# Supplementary material for: Wag31, a membrane tether, is crucial for lipid homeostasis in mycobacteria
Source: eLife journal article supplement (doi:10.7554/elife.104268), 2025-01-17

Figure 1b: Source Data

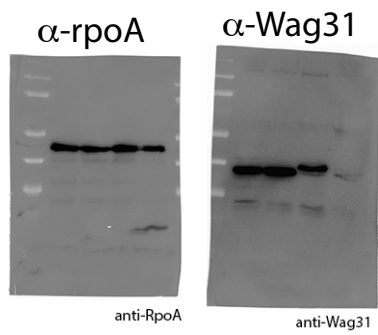

Figure 1c: Source Data

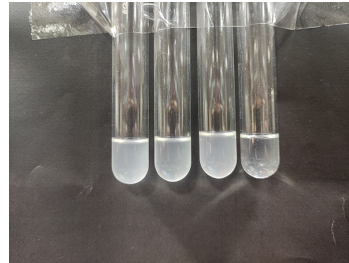

Figure 1e: Source Data

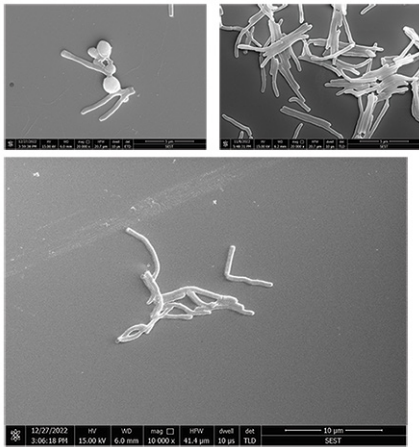

Figure 1f: Source Data

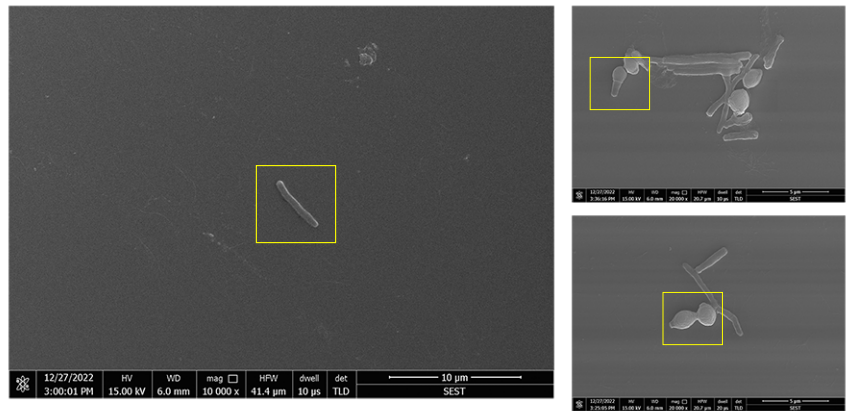

Figure 1h: Source Data

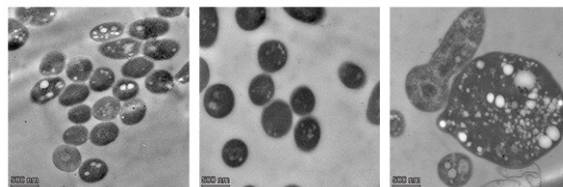

Supplement: fig1-data1 [file elife-104268-fig1-data1-v1.zip]
