# Supplementary material for: Wag31, a membrane tether, is crucial for lipid homeostasis in mycobacteria
Source: eLife journal article supplement (doi:10.7554/elife.104268), 2025-01-17
Supplement: fig1-data3 [file elife-104268-fig1-data3-v1.zip]

## Sheet: Sheet1
Figure 1D	Raw Data
	Msm+Atc				Wag31 KO				Wag31KO+Atc
00h	20000000	20000000	10000000		10000000	30000000	10000000		10000000	10000000	10000000
12h	400000000	400000000	800000000		400000000	400000000	200000000		2000000	2000000	3000000
Figure 1g	Raw Data
Msm	all rods
Wag31 KO
ROD	BULGED	ROUND	total				rod	bulged/round	total
148	73	3	224				132	68	200
66.0714	32.5893	1.33929					66	34
132	65	3	consider 200 cells
Wag31KO+Atc
ROD	BULGED	ROUND	total				rod	bulged/round	total
108	75	101	284				76	124	200
38.0282	26.4085	35.5634					38	62
76	53	71	consider 200 cells
Figure 1i	Raw Data
Msm 12h	Msm 12h	Msm 12h		wag31 ko 12h	wag31 ko 12h	wag31 ko 12h		wag31 ko + 100ATc12h	wag31 ko + 100ATc12h	wag31 ko + 100ATc12h			Msm 12h		wag31 ko 12h	wag31 ko + 100ATc12h
Lipid bodies 0-2	Lipid bodies >2-5	lipid bodies >5		Lipid bodies 0-2	Lipid bodies >2-5	lipid bodies >5		Lipid bodies 0-2	Lipid bodies >2-5	lipid bodies >5		Lipid bodies 0-2	0.768		0.716	0.12973
192	43	15		179	56	15		24	11	150		Lipid bodies >2-5	0.172		0.224	0.0594595
76.8	17.2	6		71.6	22.4	6		12.973	5.94595	81.0811		lipid bodies >5	0.06		0.06	0.810811
		total cells=250				250				185
