# Supplementary material for: Wag31, a membrane tether, is crucial for lipid homeostasis in mycobacteria
Source: eLife journal article supplement (doi:10.7554/elife.104268), 2025-01-17

Figure 2a-Source Data- Areas used for making the final figure are marked

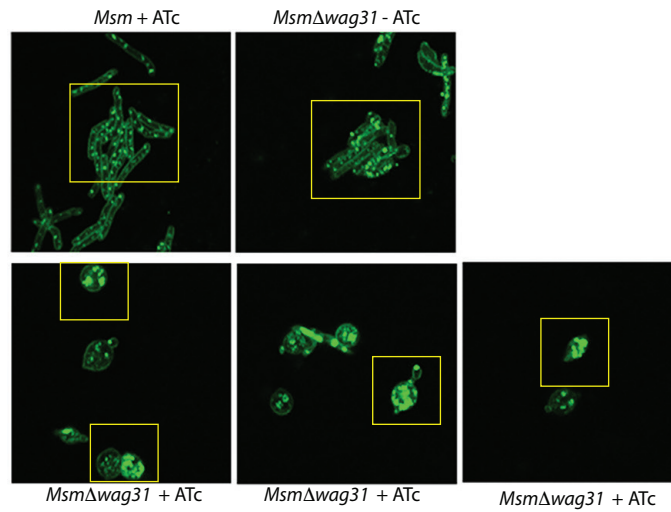

Figure 2b-Source Data: areas used for making the final figure are marked

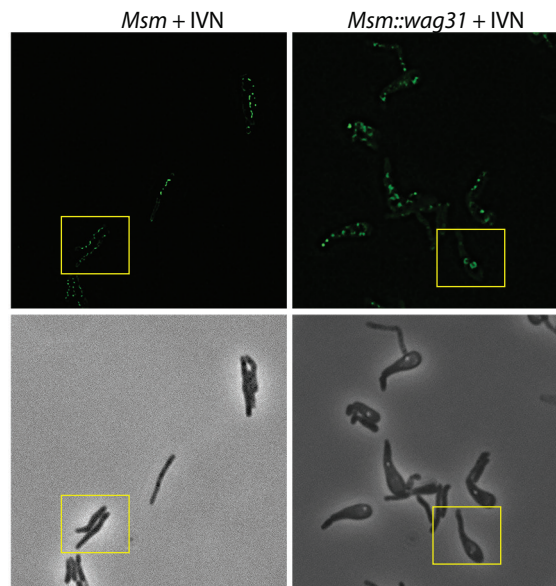

Supplement: fig2-data1 [file elife-104268-fig2-data1-v1.zip]
