# Supplementary material for: Wag31, a membrane tether, is crucial for lipid homeostasis in mycobacteria
Source: eLife journal article supplement (doi:10.7554/elife.104268), 2025-01-17
Supplement: fig2-data3 [file elife-104268-fig2-data3-v1.zip]

## Sheet: Sheet1
Figure 2c-Source Data				Figure 2d-Source Data
Msm+ATc	Wag31 KO	Wag31+ATc		Msm+IVN	Wag31+IVN
151.39	205.139	172.42		7283.37	23955.7
89.2085	230.446	202.601		23401.1	28993.5
112.914	187.574	345.834		50081.8	41421.5
121.602	91.143	300.903		9649.84	30359.5
136.514	111.668	331.17		8303.97	12942
168.262	66.688	207.419		5176.04	78988.1
152.545	198.798	564.303		2847.59	21224.4
128.411	140.736	303.906		1693.52	3682.42
125.492	238.088	864.194		2510.04	16663.4
115.623	501.986	522.474		16965.7	3240.67
138.124	210.175	369.848		6227.48	83297.1
88.64	162.853	331.277		10212.8	10180.8
108.505	180.695	673.823		3555.01	123898
95.512	147.092	424.283		1953.17	19131.8
230.833	121.844	248.221		26448	10644.6
142.997	173.825	320.899		27677.6	21417.2
211.574	80.69	262.224		23151.1	25211.9
150.369	98.054	287.843		24686.4	38147.3
159.992	217.208	397.912		27928.7	4284.63
96.777	270.69	302.926		16741.3	9673.52
224.291	260.44	121.035		42712.9	14977.4
298.91	349.252	270.409		25349.3	4601.54
216.684	152.988	576.818		14342.1	7397.52
279.433	347.537	494.477		3377.09	14731
176.519	298.826	264.849		2639.67	10465.3
329.617	263.812	351.092		1407.87	10665.3
233.557	206.604	344.859		1527.06	11266.8
231.231	191.537	228.716		727.799	15330.1
119.197	361.826	253.538		1060.44	15651.3
264.362	185.176	419.242		2096.58	25925.6
225.381	159.381	511.973		274.883	13426.9
270.255	257.943	496.923		497.019	12261.5
112.287	398.092	624.343		1913.84	152947
87.357	169.668	433.494		33610.5	56314.9
229.406	253.617	276.979		23162.7	220709
130.572	162.054	305.957		2067.55	88159.2
258.221	486.134	758.847		356.764	89918.8
104.967	416.366	306.345		86215.8	63433.9
130.865	357.606	412.382		26288.5	13709.4
203.055	299.099	208.382		28819.3	121883
273.573	234.877	284.888		63526	113923
285.899	145.83	103.913		681.86	47410.5
382.828	198.464	963.833
311.325	305.018	246.274
173.123	126.38	450.308
133.993	79.717	310.261
206.68	387.675	511.224
211.764	437.635	427.561
Figure 2f-Source Data					Figure 2g-Source Data
Lipids	Msm+ATc	ΔWag31	ΔWag31 + ATc		Lipids	Msm+ATc	ΔWag31	ΔWag31 + ATc
DAG 32:0	-0.31852	-0.32133	0.761173		CL 66:1	0.023636	-0.04595	0.176274
DAG 34:0	-0.29692	-0.65429	-0.3862		CL 66:2	0.056653	-0.04307	0.05755
DAG 36:0	-0.38334	-0.83388	-0.48249		CL 66:3	-0.07446	-0.79007	-1.03116
DAG 32:1	-0.31853	0.262788	2.49055		CL 67:1	0.208278	0.085282	0.297306
DAG 34:1	-0.40255	0.106006	1.51675		CL 67:2	0.1256	0.293636	0.457524
DAG 34:2	-0.28586	0.361989	2.44109		CL 68:0	0.135058	-0.12179	-0.4511
PE 32:0	-0.20523	-0.31637	-0.15172		CL 68:1	0.169394	0.283083	0.090551
PE 32:1	-0.44622	-0.29818	-0.5369		CL 68:2	0.134724	0.170132	0.000734
PE 34:0	-0.24727	-0.0411	-0.37927		CL 68:3	-0.03657	-0.45751	-0.79869
PE 34:1	-0.25301	-0.2161	-0.15766		CL 68:4	-0.32208	-1.30973	-1.91187
PE 35:0	-0.11338	-0.36437	-0.8796		CL 69:0	0.505317	0.401327	0.274832
PE 35:1	-0.04999	0.076812	0.730859		CL 69:1	-0.13635	-0.4619	-0.33988
PE 36:0	0	0	4		CL 69:2	0.114881	-0.31078	-0.33858
PE 36:1	0	0.22512	2.33655		CL 70:0	0.143903	-0.0896	-1.28377
PE 37:0	-1.80882	0.358458	3.27245		CL 70:1	0.12496	-0.12693	-1.35592
PE 37:1	-0.50282	1.00026	3.46175		CL 70:2	0.177579	0.113594	0.195641
PE 38:0	-1.15268	0.486475	2.2169
FFA 16:0	0.150351	0.172492	0.159706
FFA 18:0	0.274983	0.433591	0.221959
FFA 20:0	-0.19232	-0.16241	0.805666
FFA 20:1	-0.12544	-0.17323	0.57149
FFA 18:1	-0.02573	-0.13832	1.31881
FFA 18:2	-0.11455	-0.15119	1.58632
FFA 20:4	-0.33743	-0.05182	1.24579
FFA 22:0	-0.43665	-0.16362	1.08845
FFA 22:1	0.062843	-0.10788	0.832379
FFA 24:0	-0.50063	0.034768	1.55524
Figure 2h-Source Data
Lipid	Msm						Wag31 OE
C74 aMA	0.5947	0.576	0.4687	0.4518	0.483	0.5266	0.9447	1.0808	1.0962	1.0258	0.9265	0.947
C76 aMA	1.01216	0.92944	0.72187	0.74635	0.71745	0.74627	1.28305	1.48006	1.51019	1.49595	1.29862	1.2459
C78 aMA	0.47634	0.41717	0.34266	0.31854	0.32363	0.30273	0.55686	0.7262	0.67337	0.64756	0.61036	0.58094
