# Supplementary material for: Wag31, a membrane tether, is crucial for lipid homeostasis in mycobacteria
Source: eLife journal article supplement (doi:10.7554/elife.104268), 2025-01-17
Supplement: fig2-figsupp1-data3 [file elife-104268-fig2-figsupp1-data3-v1.zip]

## Sheet: Fig 2-Fig Sup 1-Source Data 1 
Figure 2-Figure supplement 1b-Source Data
Lipid	Msm						Wag31 OE
44:1 TG	3.38965	2.64651	2.41316	2.61899	3.22845	6.07621*	4.08496	4.16254	2.21021	3.20357	4.06814	2.97517
46:1 TG	10.2854	6.90634	8.15074	8.26478	9.09746	15.8272*	8.46231	9.75138	4.17452	8.02104	9.48492	5.64147
46:2 TG	25.7571	17.8071	21.2752	20.6002	21.3009	42.72588*	24.9967	25.6536	12.076	18.7888	25.2768	18.9645
47:1 TG	7.72448	5.70471	6.09119	5.89022	6.90771	13.22317*	23.7034	7.06726	11.0888	5.42415	6.93398	17.376
48:1 TG	17.8763	11.0602	14.2935	10.9968	14.1315	25.4842*	15.5304	14.2769	8.73997	10.1256	14.4573	8.22158
48:2 TG	57.1155	36.1021	51.5243	44.8822	54.829	88.68409*	47.0737	54.8176	30.9545	44.0665	57.3622	33.853
49:1 TG	27.6237	18.3198	22.9847	23.841	23.7218	43.75055*	26.5345	29.0511	13.3157	23.0824	25.9753	20.221
49:2 TG	8.94747	5.34882	7.88034	5.72048	8.47378	13.5091*	10.4664	9.85757	5.79898	7.20892	10.0086	5.61973
50:1 TG	37.7221	20.7401	29.4297	25.6272	30.3525	49.96002*	29.2323	28.8583	16.9825	19.7172	28.9277	17.9861
50:2 TG	90.1748	57.8292	92.9608	65.931	80.0875	133.2612*	78.9391	77.6831	58.8741	71.4486	85.8197	56.3423
50:3 TG	98.9482	60.0609	94.2034	71.155	92.7071	149.826*	88.0147	93.8179	60.2354	85.0773	101.835	64.8915
51:1 TG	19.6588	11.1257	13.1868	10.3252	15.6941	25.92993*	16.3689	16.1667	8.28412	10.1096	14.9844	9.54184
51:2 TG	25.4584	15.6867	21.5426	16.4234	20.6794	38.17119*	26.8804	27.0665	14.9666	16.8747	25.3385	16.4819
52:1 TG	64.8085	26.8638	31.2367	25.0207	45.4532	68.65717*	44.4442	41.9354	16.7072	25.1747	39.6125	20.5398
52:2 TG	167.769	83.9977	139.244	100.952	146.733	221.6642*	132.106	134.735	97.369	120.854	128.212	102.513
52:3 TG	163.649	101.89	151.807	105.215	128.945	224.0418*	132.363	133.282	100.089	127.073	147.784	110.811
53:1 TG	47.6803	19.408	26.6023	20.782	39.5491	61.79629*	41.0838	39.821	16.2409	26.5735	39.9412	17.33
53:2 TG	68.2841	28.6779	36.2188	25.2604	49.1421	81.10093*	56.6498	60.9952	28.5182	33.1595	53.2742	39.9123
54:3 TG	105.561	58.3539	82.1366	57.5091	90.0373	144.9001*	79.5576	82.1847	46.8389	56.7183	79.8629	52.7511
Figure 2-Figure supplement 1c-Source Data
Lipid	Msm						Wag31 OE
32:0 DG	0.1397	0.1162	0.1587	0.1247	0.1191	0.2744*	0.2185	0.2175	0.1417	0.1888	0.2101	0.1617
32:1 DG	1.51817	1.26474	1.79968	1.31497	1.16187	2.82453*	1.92074	2.12344	1.33214	2.00144	1.90791	1.64349
34:0 DG	1.16997	1.02804	1.50121	1.23886	1.0481	2.53804*	1.54747	1.60172	1.00012	1.49203	1.46851	1.22866
34:1 DG	10.4869	8.92149	13.4374	10.4986	9.73881	22.0857*	11.4713	12.3441	8.44988	12.062	11.2977	9.73384
34:2 DG	7.25063	7.05764	11.0585	7.18978	7.28825	16.2747*	10.8845	11.2238	8.83929	13.0688	10.4717	9.2996
36:0 DG	1.86984	1.34437	2.02994	1.80053	1.15901	3.81336*	2.65434	2.56557	0*	2.18609	0*	1.83967
Figure 2-Figure supplement 1d-Source Data
Lipid	Msm						Wag31 OE
31:0 PE	0.8206	0.487	0.7908	0.7745	0.5976	1.5155*	0.9236	0.9643	0.4861	0.592	0.674	0.6588
32:0 PE	2.79154	1.78305	3.78443	2.69558	1.74833	6.39199*	4.07121	4.64029	1.83219	3.59585	4.35555	3.50325
33:0 PE	0.5647	0.442	0.8059	0.5641	0.4021	1.0246*	0.8644	0.8796	0.5211	0.8958	0.9436	0.7153
34:1 PE	28.1846	17.6964	33.8697	25.3659	19.5861	45.68327*	20.9949	22.238	12.3953	22.5822	23.7504	17.4076
35:0 PE	14.277	11.6699	19.1631	14.2125	7.94016	25.77142*	17.9073	19.2614	9.1614	18.2615	19.418	14.2134
35:1 PE	7.26563	5.92993	9.43183	7.63397	3.67748	12.4844*	13.7813	15.6467	6.03428	12.5723	15.6832	10.0588
36:0 PE	0.2125	0.2576	0.3925	0.3623	0.2259	0.6822*	0.6415	0.6873	0.3094	0.4631	0.6184	0*
36:1 PE	0.5817	0.5328	0.8464	0.6424	0.4656	1.1614*	0.9086	1.1124	0.439	0.8687	0.9261	0.655
37:0 PE	0.1648	0.0828	0.3631	0.359	0.278	0.6347*	0.3948	0.4917	0.2826	0.3511	0.3181	0.2168
37:1 PE	1.84377	1.63286	2.84093	2.24051	1.54444	4.02378*	2.96905	3.39342	1.69807	3.07596	3.32512	2.44216
38:0 PE	0.3786	0.1826	0.3618	0.5054	0.2724	0.8314*	0.9603	1.1471	0.3778	0.7326	0.9141	0.7017
Figure 2-Figure supplement 1e-Source Data
Lipid	Msm						Wag31 OE
10:0 FA	0.191401	0.21338	0.170173	0.164132	0.141667	0.168012	0.134716	0.117963	0.109106	0.157237	0.120407	0.128732
12:0 FA	3.00177	2.11806	3.39419	2.59527	1.84204	2.55239	2.60427	1.84826	1.6582	3.05328	1.74263	2.29449
14:0 FA	0.553319	0.678994	0.529408	0.553467	0.546	0.581135	0.339805	0.41097	0.271306	0.361978	0.370655	0.342365
16:0 FA	7.48543	7.28083	7.15905	6.59146	6.72528	7.07941	6.06744	6.68602	5.42313	6.64044	6.26271	6.02879
18:0 FA	5.17337	4.5217	4.59383	3.97106	4.42061	4.41944	3.8838	5.03159	3.62133	4.30588	4.32473	4.03351
18:1 FA	53.0348	45.8385	41.2735	38.9302	38.157	35.9083	25.7769	33.3608	29.6331	33.1313	30.7403	29.8357
18:2 FA	1.81638	1.4894	1.30841	1.3301	1.37933	1.19246	0.945966	1.26646	1.148	1.21142	1.19558	1.09831
20:0 FA	1.36956	1.30574	1.17792	1.1735	1.27577	1.27622	1.08211	1.23924	1.25807	1.24316	1.08226	1.15474
20:1 FA	0.451418	0.384017	0.349463	0.311673	0.339043	0.332067	0.230969	0.309807	0.271403	0.285231	0.285214	0.280773
22:0 FA	1.96063	1.95718	1.73002	1.8436	1.66536	1.88529	1.59889	1.96209	1.83563	1.78475	1.52377	1.66812
22:1 FA	0.177403	0.143991	0.125479	0.128594	0.132096	0.145261	0.079312	0.110161	0.105776	0.103964	0.089327	0.09372
24:0 FA	8.88098	8.68938	7.91751	8.01299	7.63251	8.4328	6.82231	8.3853	7.89283	7.44239	6.38976	7.31681
Figure 2-Figure supplement 1f-Source Data
Lipid	Msm						Wag31 OE
66:2 CL	0.12311	0.1231	0.12119	0.11893	0.1238	0.12062	0.10996	0.10621	0.14448	0.12866	0.10233	0.11445
66:3 CL	0.13689	0.13981	0.14806	0.13825	0.1364	0.14895	0.14083	0.13009	0.14868	0.15375	0.12096	0.11904
68:1 CL	0	0.09649	0.09189	0.09776	0.10502	0.09926	0.08951	0.08977	0.09644	0	0.08939	0.08267
68:2 CL	0.4162	0.4473	0.4509	0.485	0.5069	0.4658	0.416	0.403	0.444	0.4437	0.3876	0.3905
68:3 CL	0.49498	0.49056	0.53569	0.56679	0.55884	0.51804	0.471	0.43864	0.47682	0.51427	0.44992	0.45245
68:4 CL	0.2824	0.3016	0.3015	0.3123	0.3214	0.2876	0.3103	0.3153	0.3435	0.3331	0.2866	0.3044
70:1 CL	0.121449	0.12055	0.130651	0.128898	0.144182	0.131478	0.087631	0.103695	0.098391	0.094885	0.085449	0.093224
Figure 2-Figure supplement 1g-Source Data
Lipid	Msm						Wag31 OE
32:1 PI	1.2833	1.45	1.3598	1.5898	1.4166	1.4328	0.8973	0.8592	1.0056	0.8115	0.8429	0.8323
33:0 PI	0.22247	0.21963	0.21703	0.23047	0.25049	0.19661	0.50326	0.49778	0.55662	0.48259	0.46395	0.47982
34:0 PI	0.94445	1.08877	1.05647	1.14906	1.05078	1.06986	0.65017	0.71476	0.71726	0.68962	0.66229	0.66705
34:1 PI	9.7062	10.5618	10.4695	11.1546	10.626	10.2597	5.08652	5.48827	5.87443	5.47514	5.33537	5.03685
35:0 PI	6.12644	6.33061	6.38275	7.02968	6.82021	6.00917	6.47678	6.42342	7.15929	6.8569	6.33324	6.24483
35:1 PI	3.57967	3.63369	3.79466	4.02958	3.81216	3.63274	5.09329	5.35464	5.80652	5.11308	5.14147	5.03828
36:0 PI	0.1186	0.1449	0.1564	0.1342	0.1978	0.1602	0.2448	0.1974	0.2916	0.2471	0.3004	0.2221
36:1 PI	0.14914	0.11129	0.1133	0.14701	0.10269	0.75532	0.42769	0.14027	0.14093	0	0.14732	0.26445
37:1 PI	0.1056	0.1587	0.1021	0.2754	0.1616	0.0948	0.3439	0.1825	0.2394	0.1765	0.2134	0.1832
