# Supplementary material for: Wag31, a membrane tether, is crucial for lipid homeostasis in mycobacteria
Source: eLife journal article supplement (doi:10.7554/elife.104268), 2025-01-17
Supplement: fig3-data1 [file elife-104268-fig3-data1-v1.zip]

## Sheet: Sheet1
Figure 3-Source Data 1- Data used for generating 3a, 3e and 3f
Protein FDR Confidence: Combined	Master	Accession	Description	Sequence	Exp. q-value: Combined	Sum PEP Score	Coverage [%]	# Peptides	# PSMs	# Unique Peptides	# AAs	MW [kDa]	calc. pI	Score MS Amanda 2.0: MS Amanda 2.0	Score Sequest HT: Sequest HT	# Peptides (by Search Engine): MS Amanda 2.0	# Peptides (by Search Engine): Sequest HT	Based on doi: 10.1186/1471-2180-10-121 & doi: 10.1073/pnas.1525165113 &https://doi.org/10.1016/j.celrep.2021.110154	Functional category	Pfam IDs	Entrez Gene ID	Ensembl Gene ID	Gene Symbol	Gene ID	# Protein Pathway Groups	# Razor Peptides	Found in Sample: [S5]: B1_TEST_WAG31	Found in Sample: [S6]: B2_TEST_WAG31	Found in Sample: [S7]: B3_TEST_WAG31	Found in Sample: [S8]: B4_TEST_WAG31	# Protein Groups		Functional category
High	Master Protein	A0QYB1	ATPase OS=Mycolicibacterium smegmatis (strain ATCC 700084 / mc(2)155) OX=246196 GN=MSMEG_3596 PE=4 SV=1	MQQHEREALSALRLTWAPTADDLWHSQGALHVPGLHERAMTDVLAAFDDAARETDSSPLGVVVRGPAGSGKTHLLGQVRERVQTAGGFFFLVELLDATSFWQSARAGILESLGRPGGERETQLKDLLWELASIAHISRANRRAIIGDDDLTPEILTDFVTALHKARRQTVKRAHHTLRALVLLGAADLDLQDIGEAFLVGNVGTLGATDGSEAELAAWGLPVPTLTPQESVRDISRLVALAGPAVLALDQIDTLLAQSIERTADRVSGENSEPASLDNRDLEHVAHGLMSVRQTMRRTVSVVACLPAAWEAIENRATASVHDRFRTTALLQGLPTPDIGRAILERRFSATYSAVGFSAPYPSWPILPSAFDDATQYTPRQLLKRADAHVRHCLEHDTVE…	0	230.136	44	37	185	37	1068	115.2	5.99	19069.3	137.6	34	37	Unknown	replication, recombination & repair	Pf01935	66734983	MSMEG_3596		A0QYB1; msm:MSMEG_3596	0	0	High	High	High	High	1	ATPase- DNA replication	replication, recombination & repair
High	Master Protein	A0QTE7	Propionyl-CoA carboxylase beta chain OS=Mycolicibacterium smegmatis (strain ATCC 700084 / mc(2)155) OX=246196 GN=MSMEG_1813 PE=3 SV=1	MTSVTEPSAEHQVDIHTTAGKLADLKRRTEETLHPVGEAAVDKVHAKGKLTARERILALLDEGSFVELDALAKHRSTNFGLEKNRPLGDGVITGYGTIDGRDVCIFSQDATVFGGSLGEVYGEKIVKVQELAIKTGRPLIGINDGAGARIQEGVVSLGLYSRIFHNNIKASGVIPQISLIMGAAAGGHVYSPALTDFVVMVDQTSQMFITGPDVIKTVTGEDVTMEELGGAHTHMAKSGTAHYVASGEQDAFDYVRDLLSYLPPNNYADPPLYPVAIPEGSIEETLTDEDLELDTLIPDSPNQPYDMHEVITRILDDDEFLEVQAGYAGNIVVGFGRVEGRPVGIVANQPTQFAGCLDINASEKAARFIRTCDCFNIPIVLLVDVPGFLPGTDQEYNGI…	0	155.668	38	16	104	16	542	58.4	5.16	11571.2	86.07	15	15	Pmf	lipid metabolism	Pf01039	66733251	MSMEG_1813		A0QTE7; msm:MSMEG_1813	0	0	High	High	High	High	1	propionyl-CoA carboxylase beta chain -	lipid metabolism
High	Master Protein	Q3L891	Phenyloxazoline synthase MbtB OS=Mycolicibacterium smegmatis (strain ATCC 700084 / mc(2)155) OX=246196 GN=mps2 PE=3 SV=1	MTAEPSTRTLLSFDLLDEDEHDQIEVWGNRAVLTDPGPTPVTIPALFAEQVVRAPDAVALVSGDRSWTYRELDEASNRLAHVLAEHGAKPGATVAFLIPRSGEAILSILSVLKTGAAYLPVDPAHPDARIGFMMSDAKPVAALTTADLRSRLDQYDLAVIDMADPAIDRRPSDALSGPRPDDLAYMTYTSGTTGVPKAVAVTHHNVTQLVSALHADLPSGPGQVWSQWHSLVFDVSVWEIWGALLHGGRLVVVPESVGSSPDDLHNLLITEKVSVLCQTPSAAGMLSPEGLESTTLIVAGEACPTELVDRWAPGRVMINAYGPTEATIYAAMSEPLTAGTGVAPIGAPVPGAALFVLDKWLRPAPEGVVGELYVAGHGVATGYIGRPDLTASRFVACPF…	0	71.526	8	19	58	16	2559	276.7	4.91	5346.89	20.98	19	19	PM-CW	cell wall & cell processes	Pf00501, Pf00550, Pf00668, Pf07993, Pf13193	66738588	MSMEG_0402	mps2	A0QPH7; msm:MSMEG_0402; Q3L891	0	0	High	High	High	High	1	linear gramicidin synthetase subunit D	cell wall & cell processes
High	Master Protein	A0R1Y2	glycogen phosphorylase OS=Mycolicibacterium smegmatis (strain ATCC 700084 / mc(2)155) OX=246196 GN=MSMEG_4915 PE=3 SV=1	MKALRRFTVRTHLPERLAALERLSINLRWSWHKPTQDLFATIDPEQWARNDGDPVALLGSVSPKRLDELAADHSFLDRLDELAADLDNYLTRPLWYQQQLDTGVAMPKGIAYFSMEFGVASVLPNYSGGLGILAGDHLKSASDLGLPLIAVGLYYRSGYFRQSLTADGWQHENYPSLDPQGLPLRLLTAADGDPVLIELALPEGRDLRARVWIAQVGRIPLLLLDSDIPENEHDLRGTTDRLYGGDQEHRIKQEILAGIGGVRAIRAFTEIEGLPAPEVFHMNEGHAGFLGAERIRELVAAGLDFDTALAVVRSSTVFTTHTPVPAGIDRFPVDMVKRYFGSPPGGPADSRLLPGVPLDRVIAFGAEDDPSKFNMAHMGLRLAQRANGVSLLHGRVSRS…	0	65.485	21	16	61	16	866	95.9	5.43	5351.83	34.38	16	16	PM-CW	Intermediary metabolism and respiration	Pf00343, Pf11897	66736219	MSMEG_4915		A0R1Y2; msm:MSMEG_4915	0	0	High	High	Peak Found	High	1	alpha-glucan phosphorylase family protein	Intermediary metabolism and respiration
High	Master Protein	A0R152	Ribonuclease E OS=Mycolicibacterium smegmatis (strain ATCC 700084 / mc(2)155) OX=246196 GN=rne PE=3 SV=1	MAEDAHTEDLSTQTPQQEGLPERLRVHSLARVLGTTSRRVLDALAEFDGRQRSAHSTVDKADAERVRAALTESPAAETPPEEAPAAETPVADLVVVQAEQVEVVTVSEAGPAEPAEPAEPEAPAAEAEAEAETEVADEAETPEPTFRGAVLVGDEPESRLILEHANIPPARETQTERPDYLPLFVAPQPVSFEPAVVDDEDEDDDTETGAESDFDSGADSDSDDDQADRPRRRRRGRRGRGRGRGEQNDDATSDADTDSTEDQTDGDEQESGEDSDDSGDEDSTTTEGGTRRRRRRRRRKSGSGDSDDAVSPDDPPNTVVHERAPRTERSDKSDDSEIQGISGSTRLEAKRQRRRDGRDAGRRRPPILSEAEFLARREAVERTMIVRDKVRTEPPHEGA…	0	49.607	17	13	37	13	1037	112.7	4.58	3211.6	12.8	12	13	Pmf	Translation, ribosomal structure & biogenisis	Pf10150	66735946	MSMEG_4626; MSMEI_4509	rne	A0R152; msg:MSMEI_4509; msm:MSMEG_4626	0	0	High	High	Not Found	Peak Found	1	ribonuclease, Rne/Rng family protein	Translation, ribosomal structure & biogenisis
High	Master Protein	A0QWG2	Threonine--tRNA ligase OS=Mycolicibacterium smegmatis (strain ATCC 700084 / mc(2)155) OX=246196 GN=thrS PE=3 SV=1	MTAVASSAPAAPIRVPAGTTAGAAVREADLPGRGAPDAIVVVRDAEGRLRDLSWTPDTDVEVTPVAADTEEGRSVIRHSCAHVLAQAVQELFPQAKLGIGPPITDGFYYDFDVEEPFTPEDLERLEKRMRQIIKDGQLFSRRVYESKDAAREELANEPYKLELVDDKSGDPDVMEVGGDELTAYDNLNARTKERVWGDLCRGPHIPTTRYIPAFKLTRSSAAYWRGDQNNASLQRIYGTAWESQEALDRHLELIEEAQRRDHRKLGVELDLFSFPDELGSGLPVFHPRGGVVRRELEDYSRRKHLEAGYEFVNTPHITKEQLYVTSGHLEWYADGMFPAMHIDAEYDADGQVRKPGQNYYLKPMNCPMHHLIFRSRGRSYRELPLRLFEFGSVYRYEKS…	0	41.408	21	14	44	14	684	77	5.35	3398.71	14.21	14	13	PM-CW	Translation, ribosomal structure & biogenisis	Pf00587, Pf03129, Pf07973	66734339	MSMEG_2931; MSMEI_2857	thrS	A0QWG2; I7G7V4; msg:MSMEI_2857; msm:MSMEG_2931	0	0	High	High	High	High	1	threonyl-tRNA synthetase	Translation, ribosomal structure & biogenisis
High	Master Protein	A0QPS6	Glucosidase OS=Mycolicibacterium smegmatis (strain ATCC 700084 / mc(2)155) OX=246196 GN=MSMEG_0502 PE=3 SV=1	MKLAILGGGGFRTPYVWQALIRDQGTPRVTEVALYDVDETRLATVTTICEQLALGFDDTPALRTYTELEPALEGADFVFAAIRVGGVEQRCCDEHVALDLNVLGQETTGPGGIAYALRTVPVMLDIAETVKRVAPQAYFLNFTNPAGIITEALQTVLGDRALGICDTPSGLGRRVAGVLGYDHTRIQMDYVGLNHLGWMRRVLVDGVDVLPNLLADEHRLSRMEETQIFGAEWIHSLGVIPNEYLYYYYFNRDAVRRILESPQTRGDFLLETQGKFFTEAAENPDTAAKLWGEAVDERGASYMAEAKGGVQGNPTVERERETDPAHLGYAGVALGVMAAISRDERRTMILNVRNRGTIAGLPTDAVVEVPTTVDANGVHPLTLDSQPDLHQLGLMQQVK…	0	39.228	28	10	34	10	458	49.7	5.12	3007.84	22.22	9	10	unknown	Intermediary metabolism and respiration	Pf02056, Pf11975	66738683	MSMEG_0502		A0QPS6; msm:MSMEG_0502	0	0	High	High	High	High	1	glucosidase	Intermediary metabolism and respiration
High	Master Protein	A0R684	Ferredoxin-dependent glutamate synthase 1 OS=Mycolicibacterium smegmatis (strain ATCC 700084 / mc(2)155) OX=246196 GN=MSMEG_6459 PE=3 SV=1	MGMTPSSFGGSGRSSRDNRGLYNPAYEHDACGVAMVADMHGRRSRDIVDKAITALVNLEHRGAQGAEPNTGDGAGILIQVPDAFLRAVVDFDLPEPGSYATGMAFLPQSSRDAAAACESVEKIAEAEGLEVLGWREVPTDDSSLGALARDAMPTFRQLFLGGASGMELERRAYVVRKRAEHELGTKGPGQDGPGRETVYFPSLSGQTFVYKGMLTTPQLKQFYLDLQDERLESALGIVHSRFSTNTFPSWPLAHPFRRIAHNGEINTVTGNENWMRAREALIRTDVFGSDGLDKIVPVCTPGASDTARFDEVLELLHLGGRSLPHAVLMMIPEAWERHEDMDPARRAFYEYHASLMEPWDGPASVCFTDGTVIGAVLDRNGLRPSRIWVTDDGLVVMAS…	0	35.195	8	11	29	11	1542	167	5.73	2307.87	3.35	11	10	Cytosolic	Intermediary metabolism and respiration	Pf00310, Pf01493, Pf01645, Pf04898		MSMEG_6459		A0R684; msm:MSMEG_6459	0	0	High	High	Peak Found	High	1	ferredoxin-dependent glutamate synthase 1	Intermediary metabolism and respiration
High	Master Protein	A0R582	Probable conserved transmembrane protein rich in alanine OS=Mycolicibacterium smegmatis (strain ATCC 700084 / mc(2)155) OX=246196 GN=MSMEG_6099 PE=4 SV=1	MLLVLAILASSALVFTNRVELLKLAVILALWAAVVAAFVSVIYRRQSDLDQAKARDLKLVYDLQLDREISARREYELTVETQLRRELASELRAQAADEVAALRAELAALRANLEILFDADLAHRPALETDRAAARPAGRVHASRLDVPDVETTDIRDYRSERTEESPIIDVPAEPHPPEDEWSFDRRPADGGFDRRPADGGFDRRPADGGFDRRPADGGAHRFPSQPTPQPGPQFTPQPSDEPRRRRRRRLDEEQAPAPQAERQPTPPAPPQTPPPAAPPQAPPRQAEPERAPEPQPAPQPAPQPAPQPAPEPVSAWAPPPPPPSMPPLQPSPTIEGGGWQPAPAEGQWIPAGAPGSNWAAPVQPQNGASTESAPETSTEYVGRRRAPEPAENPEPTPP…	0	32.485	25	10	41	10	516	55.6	5.1	3112.67	18.86	9	10	PM-CW	Cell wall and cell processes	Pf20570		MSMEG_6099		A0R582; msm:MSMEG_6099	0	0	High	High	High	High	1	probable conserved transmembrane protein rich in alanine, arg & proline	Cell wall and cell processes
High	Master Protein	A0R016	UDP-N-acetylglucosamine--N-acetylmuramyl-(pentapeptide) pyrophosphoryl-undecaprenol N-acetylglucosamine transferase OS=Mycolicibacterium smegmatis (strain ATCC 700084 / mc(2)155) OX=246196 GN=murG PE=3 SV=1	MNKGSRDNNHSDRGISVVLAGGGTAGHVEPAMAVADALRALDPDVRITALGTQRGLETRLVPQRGYDLELITPVPLPRKPSKDLLRLPMRVRTAIRQTRDVLTGVNADVVVGFGGYVALPAYLAARGGLTGRRKVPVVVHEANARAGLANRVGARSARRVLSAVPDSGLRNVEVVGVPVRESITSLDRAALRAQARAEFGFAEDARVLLVFGGSQGAQSINRAVSAAAKDLAAAGISVLHAHGPKNTLDLPPADPQAPPYVAVPYLDRMDLAYAAADLAICRSGAMTVAEVTAVGLPAIYVPLPIGNGEQRLNALPVVDAGGGLLVDDADLSGDTVARTVIPLLTDDSKLAAMTAAASLSGHPDAARRVAQVALEIARAARKKAS	0	30.777	23	9	34	9	385	39.9	9.76	2680.7	12.14	9	9	Pmf	Cell wall and cell processes	Pf03033, Pf04101		MSMEG_4227; MSMEI_4127	murG	A0R016; I7GD35; msg:MSMEI_4127; msm:MSMEG_4227	0	0	High	High	High	Peak Found	1	murG	Cell wall and cell processes
High	Master Protein	A0QQW2	Four-carbon acid sugar kinase family protein OS=Mycolicibacterium smegmatis (strain ATCC 700084 / mc(2)155) OX=246196 GN=MSMEG_0897 PE=3 SV=1	MKTVVLDDDPTGTQSASGVRVLLECSADAIEETLRDAESVYVQTNSRALAEADAVDLVRRIRADGEEAARRLGVDVRFVLRGDSTLRGHVFAETEVFLDGDAVMVFVPAFPDGGRTTRDGVHYVNVGGHDLPAHESEYAADPVFGFSTGVLVDYVAEKSGRTAVPVPLATVRGGGLATVLSTARPGTVVLPDAVDNTDIRVIAEAIATAGDAGRAIVVRTAAPVAAELAGVTSRGLLRAPLLDRPLPTLLVCGSHTTGATTQLAPVIDRWGAPIVVDTAGALDDPDSEGRHAADQLRAQLDARSFAVLMSERDRSSDHNTLSHGERIMTALTTAVRGALPHLSVVVAKGGITSAEVARTGIGATSALVLGQVCPGVSVWQLEDRNGRDILYVVVPGNVG…	0	30.411	21	7	20	7	425	44.3	5.33	2140.92	11.54	7	7	unknown	conserved hypothetical	Pf07005, Pf17042	66739066	MSMEG_0897		A0QQW2; msm:MSMEG_0897	0	0	High	High	High	High	1	conserved hypothetical protein	conserved hypothetical
High	Master Protein	A0QU64	D-aminopeptidase OS=Mycolicibacterium smegmatis (strain ATCC 700084 / mc(2)155) OX=246196 GN=MSMEG_2092 PE=3 SV=1	MGRARDYDIIIGDLQTGPLNAITDVDGVRVGHTTLVSGSGPRNPGNGPVRTGVTVVIPREEPWNRPLFAAPHRLNGNGELTGQHWVAESGQLTSYIGLTNTHSVGVVRDALIAHEKSVRGDEFFFSLPVVGETCDGILNDLNGFHVRPEHVAEAIENATDGPVEEGAVGGGTGMVAHGYKGGIGTSSRVVGDHTVGVLVQANHGARERLMIDGVPVGRLLPPPPTPVIMPGQPPEGTGSIIVLVATDAPLIPTQCARLAQRAALGIARTGGAGENGSGDIAFCFATGNGFVGDFAAEPGPDVAQINMLANRLIDGLFYATVEATEEAIINAMFAAETMEGPEGLVVHALPRDETAELVKRYRSMVVG	0	30.367	22	7	41	7	367	38.2	5.15	3782.86	25.68	7	7	unknown	Cell wall and cell processes	Pf03576	66733519	MSMEG_2092		A0QU64; msm:MSMEG_2092	0	0	High	High	High	Peak Found	1	D-aminopeptidase	Cell wall and cell processes
High	Master Protein	A0R7C9	Class II aldolase/adducin domain protein OS=Mycolicibacterium smegmatis (strain ATCC 700084 / mc(2)155) OX=246196 GN=MSMEG_6863 PE=4 SV=1	MKMEQRSPAPTEAELRRELAAVYRLVAHYRMTDLVFTHISVRLPGNDHHFLINPYGLLFEEITASSLVRVDLNGNVIGETPYCVNPAGFVIHSAIHAAREDAACVLHTHTLAGCAVAASASGLLPVNQISMEFFNRVGYHDYEGVALNLDEQKRLVEDLGTHDALILRNHGLLTVGATPARAFLRMYYLNKACEIQIAASQLGELVIPDPRIIEHAAQQLVGDAAGDDYTDDVGYDLAWAAMVRMLDRTQPDYRD	0	28.986	22	5	25	5	255	28.2	5.54	2386.1	9.68	5	5	unknown	cell wall & cell processes	Pf00596	66738118	MSMEG_6863		A0R7C9; msm:MSMEG_6863	0	0	High	High	High	High	1	class II aldolase/adducin domain protein	cell wall & cell processes
High	Master Protein	A0QX15	Thioredoxin OS=Mycolicibacterium smegmatis (strain ATCC 700084 / mc(2)155) OX=246196 GN=trx PE=4 SV=1	MSTLDITAEQFNDTVNDNEIVLVDFWASWCGPCKAFAPTFAASAEKHPDVVHAKVDTEAEQALAAAADIRSIPTLMAFKKGKLVFNQAGALPPAALEDLVQKIKEFDIDAAMREQAAQGGAEEV	0	26.407	31	4	28	4	124	13.3	4.59	2630.4	13.41	4	4	Cytosolic	Intermediary metabolism and respiration	Pf00085	66734539	MSMEG_3138	trx	A0QX15; msm:MSMEG_3138	0	0	High	High	High	High	1	thioredoxin	Intermediary metabolism and respiration
High	Master Protein	A0QPE7	Oxidoreductase, short chain dehydrogenase/reductase family protein OS=Mycolicibacterium smegmatis (strain ATCC 700084 / mc(2)155) OX=246196 GN=MSMEG_0372 PE=1 SV=1	MASDLFSQVVNSGPGSFLAKQLGVPQPETLRRYRPGDPPLAGSLLIGGSGRVAEPLRTALADDYNLVSNNIGGRWADSFGGVVFDATGITEAEGLKELYTFFTPLLRNLAPCARVVVVGTTPAEAGSVHAQVVQRALEGFTRSLGKELRRGATVSLVYLSADAKPGATGLESTMRFILSAKSAYVDGQVFRVGAADSTPPADWDKPLDGKVAVVTGAARGIGATIAEVFARDGATVVAIDVDGAAEDLKRVADKVGGTALTLDVTADDAVDKITAHVTEHHGGKVDILVNNAGITRDKLLANMDEKRWDAVIAVNLLAPQRLTEGLVGNGTIGEGGRVIGLSSMAGIAGNRGQTNYATTKAGMIGLAEALAPVLADKGITINAVAPGFIETKMTEAIPL…	0	25.09	18	6	24	6	450	46.5	5.82	2249.91	12.13	6	6	Pmf	Lipid metabolism	Pf13561	66738559	MSMEG_0372		A0QPE7; msm:MSMEG_0372	0	0	High	High	Peak Found	High	1	oxidoreductase, short chain dehydrogenase/reductase family protein	Lipid metabolism
High	Master Protein	A0QV38	RNA-binding protein KhpA OS=Mycolicibacterium smegmatis (strain ATCC 700084 / mc(2)155) OX=246196 GN=khpA PE=3 SV=1	MVDAVEHLVRGIVDNPDDVRVDMVTNRRGRTVEVHVHPDDLGKVIGRGGRTATALRTLVAGIGGRGIRVDVVDTDQ	0	23.91	54	4	21	4	76	8.2	6.8	2472.19	14.04	4	4	Pmf	unknown	Pf13083		MSMEG_2436	khpA	A0QV38; msm:MSMEG_2436	0	0	High	High	Not Found	High	1	conserved hypothetical protein	unknown
High	Master Protein	A0QUZ5	Glycerol-3-phosphate dehydrogenase [NAD(P)+] OS=Mycolicibacterium smegmatis (strain ATCC 700084 / mc(2)155) OX=246196 GN=gpsA PE=3 SV=1	MEAAVMGCGAWGTALAKVLADAGNPVTMWARRPEVADEINSEHRNSEYLGDVVLPASIRATSDPEEALRGACTVMLAVPSQKLRANLDNWKHLIEDDVTLVSLAKGIELGTLMRMSQVIVQVTGADPSRVGVVSGPNLASEIADEQPAATVIACSDSGRAVTLQRAMATGYFRPYTNPDVIGAEVGGACKNVIALACGMAVGVGLGENTVAALITRGLAEIMRLGIALGATPATLAGLAGVGDLVATCTSPHSRNRTFGERLGKGGTMESALAAAGGHVAEGVASCESVLALASSYGVEMPLTDAVHRVCHKGLSVHEAVALLLGRSTKPE	0	21.179	20	6	24	6	331	33.9	5.64	2213.24	14.33	6	6	Cytosolic	Lipid metabolism	Pf01210, Pf07479, Pf20618		MSMEG_2393	gpsA	A0QUZ5; msm:MSMEG_2393	0	0	High	High	High	High	1	NAD-dependent glycerol-3-phosphate dehydrogenase	Lipid metabolism
High	Master Protein	A0QV18	Cell division initiation protein OS=Mycolicibacterium smegmatis (strain ATCC 700084 / mc(2)155) OX=246196 GN=MSMEG_2416 PE=4 SV=1	MYRVFEALDELGAIVEEARGVPMTAGCVVPRGDVLELIDDIKDAIPGELDDAQDVLDARDSLLREAKEHSESVISGANAEADSVLSHARAEADRLLADAKAQADRMVAEARQHSERMVTEAREEAARLAAAAKREYEASTGRAKAEADRLIENGNISYEKAIQEGIKEQQRLVSQTEIVATANAEATRLIDAAHAEADRLRGECDIYVDSKLAEFEEFLNGTLRSVGRGRHQLRTTAGTHDYVTR	0	19.813	16	3	13	3	245	26.8	4.89	849.96	8.13	2	3	Cell wall	cell wall & cell processes		66733830	MSMEG_2416	sepIVA	A0QV18; msm:MSMEG_2416	0	0	High	High	Peak Found	High	1	SepIVA	cell wall & cell processes
High	Master Protein	A0QRA5	ABC-type molybdenum transport system, ATPase component OS=Mycolicibacterium smegmatis (strain ATCC 700084 / mc(2)155) OX=246196 GN=MSMEG_1046 PE=4 SV=1	MPTTGEDAADNPDLLIDFARVTLRRGGNTLVGPITWAVELDERWVVIGPNGAGKTSLLRIAAATEHPSSGTAYVLGERLGRTDMAELRSRVGLSSSALSQRIPDDEIVRDLVVSAGYAVLGRWREQYDDVDYEQAVNMLESVGAEHLAERRYGTLSEGERKRVLIARSLMTDPELLLLDEPAAGLDLGGREDLVARLTDLAADPDAPAMVLVTHHVEEIPVGFSHGLILSEGKVVASGLLTDVLTSENLSKAFGQAIALEVIDGRYFARRVRSRAAHRRRND	0	18.94	19	4	12	4	282	30.6	5.19	1234.2	2.91	4	3	Cell wall	Cell wall and cell processes	Pf00005	66733740	MSMEG_1046; MSMEG_2326		A0QRA5; msm:MSMEG_1046; msm:MSMEG_2326	0	0	High	High	High	High	1	ABC-type molybdenum transport system, ATPase component	Cell wall and cell processes
High	Master Protein	A0QUE0	Superfamily protein I DNA or RNA helicase OS=Mycolicibacterium smegmatis (strain ATCC 700084 / mc(2)155) OX=246196 GN=MSMEG_2174 PE=1 SV=1	MSGRDYEDELQSERDYVAGLYARLDAERAQSQRRYAAALREHGGTAVERDAEVRALAKDIARLNVADNGLCFGRLDTLDDARLYIGRLGIFDRDNDFEPLLLDWRAPMARPFYVATAANPENMRRRRQFHTLGRKVVDFTDEILGRPTGAEHDATNDAALLAAVNAPRGEGMRDIVATIQAEQDQVIRLDHTGVLVIEGGPGTGKTVVALHRVAYLLYTYRKQMERHGVLVVGPTPAFLDHIGRVLPSLGESDAVFMTPGDFVPGLHVTAEDTPEAAEVKGSLKILDVLKAAVADRQELPSEPIPIDLSDVTMRIDAETAKWARDEARKTGLPHNEARAEFVDVVTYVVTERAVARIGRGWLTRDDKHAWEKMRADVVGELEDHEQFNAALDALWPILT…	0	18.64	10	7	25	7	736	81.1	4.86	1592.63	2.26	6	7	Cell wall	replication, recombination & repair	Pf13245	66733596	MSMEG_2174		A0QUE0; msm:MSMEG_2174	0	0	High	High	High	High	1	superfamily protein I DNA or RNA helicase	replication, recombination & repair
