# Supplementary material for: Wag31, a membrane tether, is crucial for lipid homeostasis in mycobacteria
Source: eLife journal article supplement (doi:10.7554/elife.104268), 2025-01-17
Supplement: fig3-figsupp2-data1 [file elife-104268-fig3-figsupp2-data1-v1.zip]

## Sheet: Wag31 interactors post analysis
Figure 3-Figure Supplement 2-Source Data 1 -Final list of proteins that are interacting with Wag31. Source data for the controls and Wag31 used for generating this final list is provided in the corresponding Zip file.
Protein FDR Confidence: Combined	Master	Accession	Description	Sequence	Exp. q-value: Combined	Sum PEP Score	Coverage [%]	# Peptides	# PSMs	# Unique Peptides	# AAs	MW [kDa]	calc. pI	Score MS Amanda 2.0: MS Amanda 2.0	Score Sequest HT: Sequest HT	# Peptides (by Search Engine): MS Amanda 2.0	# Peptides (by Search Engine): Sequest HT	Exact function	Localisation	Pfam IDs	Entrez Gene ID	Ensembl Gene ID	Gene Symbol	Gene ID	# Protein Pathway Groups	# Razor Peptides	Found in Sample: [S5]: B1_TEST_WAG31	Found in Sample: [S6]: B2_TEST_WAG31	Found in Sample: [S7]: B3_TEST_WAG31	Found in Sample: [S8]: B4_TEST_WAG31	# Protein Groups
High	Master Protein	A0QYB1	ATPase OS=Mycolicibacterium smegmatis (strain ATCC 700084 / mc(2)155) OX=246196 GN=MSMEG_3596 PE=4 SV=1	MQQHEREALSALRLTWAPTADDLWHSQGALHVPGLHERAMTDVLAAFDDAARETDSSPLGVVVRGPAGSGKTHLLGQVRERVQTAGGFFFLVELLDATSFWQSARAGILESLGRPGGERETQLKDLLWELASIAHISRANRRAIIGDDDLTPEILTDFVTALHKARRQTVKRAHHTLRALVLLGAADLDLQDIGEAFLVGNVGTLGATDGSEAELAAWGLPVPTLTPQESVRDISRLVALAGPAVLALDQIDTLLAQSIERTADRVSGENSEPASLDNRDLEHVAHGLMSVRQTMRRTVSVVACLPAAWEAIENRATASVHDRFRTTALLQGLPTPDIGRAILERRFSATYSAVGFSAPYPSWPILPSAFDDATQYTPRQLLKRADAHVRHCLEHDTVE…	0	230.136	44	37	185	37	1068	115.2	5.99	19069.3	137.6	34	37	AAA ATPase		Pf01935	66734983	MSMEG_3596		A0QYB1; msm:MSMEG_3596	0	0	High	High	High	High	1
High	Master Protein	A0QTE7	Propionyl-CoA carboxylase beta chain OS=Mycolicibacterium smegmatis (strain ATCC 700084 / mc(2)155) OX=246196 GN=MSMEG_1813 PE=3 SV=1	MTSVTEPSAEHQVDIHTTAGKLADLKRRTEETLHPVGEAAVDKVHAKGKLTARERILALLDEGSFVELDALAKHRSTNFGLEKNRPLGDGVITGYGTIDGRDVCIFSQDATVFGGSLGEVYGEKIVKVQELAIKTGRPLIGINDGAGARIQEGVVSLGLYSRIFHNNIKASGVIPQISLIMGAAAGGHVYSPALTDFVVMVDQTSQMFITGPDVIKTVTGEDVTMEELGGAHTHMAKSGTAHYVASGEQDAFDYVRDLLSYLPPNNYADPPLYPVAIPEGSIEETLTDEDLELDTLIPDSPNQPYDMHEVITRILDDDEFLEVQAGYAGNIVVGFGRVEGRPVGIVANQPTQFAGCLDINASEKAARFIRTCDCFNIPIVLLVDVPGFLPGTDQEYNGI…	0	155.668	38	16	104	16	542	58.4	5.16	11571.2	86.07	15	15	Key enzyme in the catabolic pathway of odd-chain fatty acids, isoleucine, threonine, methionine, and valine	cytoplasm (PSORTb)	Pf01039	66733251	MSMEG_1813		A0QTE7; msm:MSMEG_1813	0	0	High	High	High	High	1
High	Master Protein	Q3L891	Phenyloxazoline synthase MbtB OS=Mycolicibacterium smegmatis (strain ATCC 700084 / mc(2)155) OX=246196 GN=mps2 PE=3 SV=1	MTAEPSTRTLLSFDLLDEDEHDQIEVWGNRAVLTDPGPTPVTIPALFAEQVVRAPDAVALVSGDRSWTYRELDEASNRLAHVLAEHGAKPGATVAFLIPRSGEAILSILSVLKTGAAYLPVDPAHPDARIGFMMSDAKPVAALTTADLRSRLDQYDLAVIDMADPAIDRRPSDALSGPRPDDLAYMTYTSGTTGVPKAVAVTHHNVTQLVSALHADLPSGPGQVWSQWHSLVFDVSVWEIWGALLHGGRLVVVPESVGSSPDDLHNLLITEKVSVLCQTPSAAGMLSPEGLESTTLIVAGEACPTELVDRWAPGRVMINAYGPTEATIYAAMSEPLTAGTGVAPIGAPVPGAALFVLDKWLRPAPEGVVGELYVAGHGVATGYIGRPDLTASRFVACPF…	0	71.526	8	19	58	16	2559	276.7	4.91	5346.89	20.98	19	19			Pf00501, Pf00550, Pf00668, Pf07993, Pf13193	66738588	MSMEG_0402	mps2	A0QPH7; msm:MSMEG_0402; Q3L891	0	0	High	High	High	High	1
High	Master Protein	A0R1Y2	glycogen phosphorylase OS=Mycolicibacterium smegmatis (strain ATCC 700084 / mc(2)155) OX=246196 GN=MSMEG_4915 PE=3 SV=1	MKALRRFTVRTHLPERLAALERLSINLRWSWHKPTQDLFATIDPEQWARNDGDPVALLGSVSPKRLDELAADHSFLDRLDELAADLDNYLTRPLWYQQQLDTGVAMPKGIAYFSMEFGVASVLPNYSGGLGILAGDHLKSASDLGLPLIAVGLYYRSGYFRQSLTADGWQHENYPSLDPQGLPLRLLTAADGDPVLIELALPEGRDLRARVWIAQVGRIPLLLLDSDIPENEHDLRGTTDRLYGGDQEHRIKQEILAGIGGVRAIRAFTEIEGLPAPEVFHMNEGHAGFLGAERIRELVAAGLDFDTALAVVRSSTVFTTHTPVPAGIDRFPVDMVKRYFGSPPGGPADSRLLPGVPLDRVIAFGAEDDPSKFNMAHMGLRLAQRANGVSLLHGRVSRS…	0	65.485	21	16	61	16	866	95.9	5.43	5351.83	34.38	16	16			Pf00343, Pf11897	66736219	MSMEG_4915		A0R1Y2; msm:MSMEG_4915	0	0	High	High	Peak Found	High	1
High	Master Protein	A0R152	Ribonuclease E OS=Mycolicibacterium smegmatis (strain ATCC 700084 / mc(2)155) OX=246196 GN=rne PE=3 SV=1	MAEDAHTEDLSTQTPQQEGLPERLRVHSLARVLGTTSRRVLDALAEFDGRQRSAHSTVDKADAERVRAALTESPAAETPPEEAPAAETPVADLVVVQAEQVEVVTVSEAGPAEPAEPAEPEAPAAEAEAEAETEVADEAETPEPTFRGAVLVGDEPESRLILEHANIPPARETQTERPDYLPLFVAPQPVSFEPAVVDDEDEDDDTETGAESDFDSGADSDSDDDQADRPRRRRRGRRGRGRGRGEQNDDATSDADTDSTEDQTDGDEQESGEDSDDSGDEDSTTTEGGTRRRRRRRRRKSGSGDSDDAVSPDDPPNTVVHERAPRTERSDKSDDSEIQGISGSTRLEAKRQRRRDGRDAGRRRPPILSEAEFLARREAVERTMIVRDKVRTEPPHEGA…	0	49.607	17	13	37	13	1037	112.7	4.58	3211.6	12.8	12	13	Translation, ribosomal structure and biogenesis	cytoplasm, foci near pole & septum	Pf10150	66735946	MSMEG_4626; MSMEI_4509	rne	A0R152; msg:MSMEI_4509; msm:MSMEG_4626	0	0	High	High	Not Found	Peak Found	1
High	Master Protein	A0QWG2	Threonine--tRNA ligase OS=Mycolicibacterium smegmatis (strain ATCC 700084 / mc(2)155) OX=246196 GN=thrS PE=3 SV=1	MTAVASSAPAAPIRVPAGTTAGAAVREADLPGRGAPDAIVVVRDAEGRLRDLSWTPDTDVEVTPVAADTEEGRSVIRHSCAHVLAQAVQELFPQAKLGIGPPITDGFYYDFDVEEPFTPEDLERLEKRMRQIIKDGQLFSRRVYESKDAAREELANEPYKLELVDDKSGDPDVMEVGGDELTAYDNLNARTKERVWGDLCRGPHIPTTRYIPAFKLTRSSAAYWRGDQNNASLQRIYGTAWESQEALDRHLELIEEAQRRDHRKLGVELDLFSFPDELGSGLPVFHPRGGVVRRELEDYSRRKHLEAGYEFVNTPHITKEQLYVTSGHLEWYADGMFPAMHIDAEYDADGQVRKPGQNYYLKPMNCPMHHLIFRSRGRSYRELPLRLFEFGSVYRYEKS…	0	41.408	21	14	44	14	684	77	5.35	3398.71	14.21	14	13	Translation, ribosomal structure and biogenesis	cytoplasm	Pf00587, Pf03129, Pf07973	66734339	MSMEG_2931; MSMEI_2857	thrS	A0QWG2; I7G7V4; msg:MSMEI_2857; msm:MSMEG_2931	0	0	High	High	High	High	1
High	Master Protein	A0QPS6	Glucosidase OS=Mycolicibacterium smegmatis (strain ATCC 700084 / mc(2)155) OX=246196 GN=MSMEG_0502 PE=3 SV=1	MKLAILGGGGFRTPYVWQALIRDQGTPRVTEVALYDVDETRLATVTTICEQLALGFDDTPALRTYTELEPALEGADFVFAAIRVGGVEQRCCDEHVALDLNVLGQETTGPGGIAYALRTVPVMLDIAETVKRVAPQAYFLNFTNPAGIITEALQTVLGDRALGICDTPSGLGRRVAGVLGYDHTRIQMDYVGLNHLGWMRRVLVDGVDVLPNLLADEHRLSRMEETQIFGAEWIHSLGVIPNEYLYYYYFNRDAVRRILESPQTRGDFLLETQGKFFTEAAENPDTAAKLWGEAVDERGASYMAEAKGGVQGNPTVERERETDPAHLGYAGVALGVMAAISRDERRTMILNVRNRGTIAGLPTDAVVEVPTTVDANGVHPLTLDSQPDLHQLGLMQQVK…	0	39.228	28	10	34	10	458	49.7	5.12	3007.84	22.22	9	10			Pf02056, Pf11975	66738683	MSMEG_0502		A0QPS6; msm:MSMEG_0502	0	0	High	High	High	High	1
High	Master Protein	A0R684	Ferredoxin-dependent glutamate synthase 1 OS=Mycolicibacterium smegmatis (strain ATCC 700084 / mc(2)155) OX=246196 GN=MSMEG_6459 PE=3 SV=1	MGMTPSSFGGSGRSSRDNRGLYNPAYEHDACGVAMVADMHGRRSRDIVDKAITALVNLEHRGAQGAEPNTGDGAGILIQVPDAFLRAVVDFDLPEPGSYATGMAFLPQSSRDAAAACESVEKIAEAEGLEVLGWREVPTDDSSLGALARDAMPTFRQLFLGGASGMELERRAYVVRKRAEHELGTKGPGQDGPGRETVYFPSLSGQTFVYKGMLTTPQLKQFYLDLQDERLESALGIVHSRFSTNTFPSWPLAHPFRRIAHNGEINTVTGNENWMRAREALIRTDVFGSDGLDKIVPVCTPGASDTARFDEVLELLHLGGRSLPHAVLMMIPEAWERHEDMDPARRAFYEYHASLMEPWDGPASVCFTDGTVIGAVLDRNGLRPSRIWVTDDGLVVMAS…	0	35.195	8	11	29	11	1542	167	5.73	2307.87	3.35	11	10		cytoplasmic membrane	Pf00310, Pf01493, Pf01645, Pf04898		MSMEG_6459		A0R684; msm:MSMEG_6459	0	0	High	High	Peak Found	High	1
High	Master Protein	A0R582	Probable conserved transmembrane protein rich in alanine OS=Mycolicibacterium smegmatis (strain ATCC 700084 / mc(2)155) OX=246196 GN=MSMEG_6099 PE=4 SV=1	MLLVLAILASSALVFTNRVELLKLAVILALWAAVVAAFVSVIYRRQSDLDQAKARDLKLVYDLQLDREISARREYELTVETQLRRELASELRAQAADEVAALRAELAALRANLEILFDADLAHRPALETDRAAARPAGRVHASRLDVPDVETTDIRDYRSERTEESPIIDVPAEPHPPEDEWSFDRRPADGGFDRRPADGGFDRRPADGGFDRRPADGGAHRFPSQPTPQPGPQFTPQPSDEPRRRRRRRLDEEQAPAPQAERQPTPPAPPQTPPPAAPPQAPPRQAEPERAPEPQPAPQPAPQPAPQPAPEPVSAWAPPPPPPSMPPLQPSPTIEGGGWQPAPAEGQWIPAGAPGSNWAAPVQPQNGASTESAPETSTEYVGRRRAPEPAENPEPTPP…	0	32.485	25	10	41	10	516	55.6	5.1	3112.67	18.86	9	10		membrane	Pf20570		MSMEG_6099		A0R582; msm:MSMEG_6099	0	0	High	High	High	High	1
High	Master Protein	A0R016	UDP-N-acetylglucosamine--N-acetylmuramyl-(pentapeptide) pyrophosphoryl-undecaprenol N-acetylglucosamine transferase OS=Mycolicibacterium smegmatis (strain ATCC 700084 / mc(2)155) OX=246196 GN=murG PE=3 SV=1	MNKGSRDNNHSDRGISVVLAGGGTAGHVEPAMAVADALRALDPDVRITALGTQRGLETRLVPQRGYDLELITPVPLPRKPSKDLLRLPMRVRTAIRQTRDVLTGVNADVVVGFGGYVALPAYLAARGGLTGRRKVPVVVHEANARAGLANRVGARSARRVLSAVPDSGLRNVEVVGVPVRESITSLDRAALRAQARAEFGFAEDARVLLVFGGSQGAQSINRAVSAAAKDLAAAGISVLHAHGPKNTLDLPPADPQAPPYVAVPYLDRMDLAYAAADLAICRSGAMTVAEVTAVGLPAIYVPLPIGNGEQRLNALPVVDAGGGLLVDDADLSGDTVARTVIPLLTDDSKLAAMTAAASLSGHPDAARRVAQVALEIARAARKKAS	0	30.777	23	9	34	9	385	39.9	9.76	2680.7	12.14	9	9		membrane	Pf03033, Pf04101		MSMEG_4227; MSMEI_4127	murG	A0R016; I7GD35; msg:MSMEI_4127; msm:MSMEG_4227	0	0	High	High	High	Peak Found	1
High	Master Protein	A0QQW2	Four-carbon acid sugar kinase family protein OS=Mycolicibacterium smegmatis (strain ATCC 700084 / mc(2)155) OX=246196 GN=MSMEG_0897 PE=3 SV=1	MKTVVLDDDPTGTQSASGVRVLLECSADAIEETLRDAESVYVQTNSRALAEADAVDLVRRIRADGEEAARRLGVDVRFVLRGDSTLRGHVFAETEVFLDGDAVMVFVPAFPDGGRTTRDGVHYVNVGGHDLPAHESEYAADPVFGFSTGVLVDYVAEKSGRTAVPVPLATVRGGGLATVLSTARPGTVVLPDAVDNTDIRVIAEAIATAGDAGRAIVVRTAAPVAAELAGVTSRGLLRAPLLDRPLPTLLVCGSHTTGATTQLAPVIDRWGAPIVVDTAGALDDPDSEGRHAADQLRAQLDARSFAVLMSERDRSSDHNTLSHGERIMTALTTAVRGALPHLSVVVAKGGITSAEVARTGIGATSALVLGQVCPGVSVWQLEDRNGRDILYVVVPGNVG…	0	30.411	21	7	20	7	425	44.3	5.33	2140.92	11.54	7	7		cytoplasm	Pf07005, Pf17042	66739066	MSMEG_0897		A0QQW2; msm:MSMEG_0897	0	0	High	High	High	High	1
High	Master Protein	A0QU64	D-aminopeptidase OS=Mycolicibacterium smegmatis (strain ATCC 700084 / mc(2)155) OX=246196 GN=MSMEG_2092 PE=3 SV=1	MGRARDYDIIIGDLQTGPLNAITDVDGVRVGHTTLVSGSGPRNPGNGPVRTGVTVVIPREEPWNRPLFAAPHRLNGNGELTGQHWVAESGQLTSYIGLTNTHSVGVVRDALIAHEKSVRGDEFFFSLPVVGETCDGILNDLNGFHVRPEHVAEAIENATDGPVEEGAVGGGTGMVAHGYKGGIGTSSRVVGDHTVGVLVQANHGARERLMIDGVPVGRLLPPPPTPVIMPGQPPEGTGSIIVLVATDAPLIPTQCARLAQRAALGIARTGGAGENGSGDIAFCFATGNGFVGDFAAEPGPDVAQINMLANRLIDGLFYATVEATEEAIINAMFAAETMEGPEGLVVHALPRDETAELVKRYRSMVVG	0	30.367	22	7	41	7	367	38.2	5.15	3782.86	25.68	7	7		cytoplasmic membrane	Pf03576	66733519	MSMEG_2092		A0QU64; msm:MSMEG_2092	0	0	High	High	High	Peak Found	1
High	Master Protein	A0R7C9	Class II aldolase/adducin domain protein OS=Mycolicibacterium smegmatis (strain ATCC 700084 / mc(2)155) OX=246196 GN=MSMEG_6863 PE=4 SV=1	MKMEQRSPAPTEAELRRELAAVYRLVAHYRMTDLVFTHISVRLPGNDHHFLINPYGLLFEEITASSLVRVDLNGNVIGETPYCVNPAGFVIHSAIHAAREDAACVLHTHTLAGCAVAASASGLLPVNQISMEFFNRVGYHDYEGVALNLDEQKRLVEDLGTHDALILRNHGLLTVGATPARAFLRMYYLNKACEIQIAASQLGELVIPDPRIIEHAAQQLVGDAAGDDYTDDVGYDLAWAAMVRMLDRTQPDYRD	0	28.986	22	5	25	5	255	28.2	5.54	2386.1	9.68	5	5		cytoplasmic	Pf00596	66738118	MSMEG_6863		A0R7C9; msm:MSMEG_6863	0	0	High	High	High	High	1			Figure 3-Figure Supplement 2-Source Data 1 -Final list of proteins that are interacting with Wag31. Source data for the controls and Wag31 used for generating this final list is provided in the corresponding Zip file.
High	Master Protein	A0QX15	Thioredoxin OS=Mycolicibacterium smegmatis (strain ATCC 700084 / mc(2)155) OX=246196 GN=trx PE=4 SV=1	MSTLDITAEQFNDTVNDNEIVLVDFWASWCGPCKAFAPTFAASAEKHPDVVHAKVDTEAEQALAAAADIRSIPTLMAFKKGKLVFNQAGALPPAALEDLVQKIKEFDIDAAMREQAAQGGAEEV	0	26.407	31	4	28	4	124	13.3	4.59	2630.4	13.41	4	4		cytoplasmic	Pf00085	66734539	MSMEG_3138	trx	A0QX15; msm:MSMEG_3138	0	0	High	High	High	High	1
High	Master Protein	A0QPE7	Oxidoreductase, short chain dehydrogenase/reductase family protein OS=Mycolicibacterium smegmatis (strain ATCC 700084 / mc(2)155) OX=246196 GN=MSMEG_0372 PE=1 SV=1	MASDLFSQVVNSGPGSFLAKQLGVPQPETLRRYRPGDPPLAGSLLIGGSGRVAEPLRTALADDYNLVSNNIGGRWADSFGGVVFDATGITEAEGLKELYTFFTPLLRNLAPCARVVVVGTTPAEAGSVHAQVVQRALEGFTRSLGKELRRGATVSLVYLSADAKPGATGLESTMRFILSAKSAYVDGQVFRVGAADSTPPADWDKPLDGKVAVVTGAARGIGATIAEVFARDGATVVAIDVDGAAEDLKRVADKVGGTALTLDVTADDAVDKITAHVTEHHGGKVDILVNNAGITRDKLLANMDEKRWDAVIAVNLLAPQRLTEGLVGNGTIGEGGRVIGLSSMAGIAGNRGQTNYATTKAGMIGLAEALAPVLADKGITINAVAPGFIETKMTEAIPL…	0	25.09	18	6	24	6	450	46.5	5.82	2249.91	12.13	6	6		cytoplasmic	Pf13561	66738559	MSMEG_0372		A0QPE7; msm:MSMEG_0372	0	0	High	High	Peak Found	High	1
High	Master Protein	A0QV38	RNA-binding protein KhpA OS=Mycolicibacterium smegmatis (strain ATCC 700084 / mc(2)155) OX=246196 GN=khpA PE=3 SV=1	MVDAVEHLVRGIVDNPDDVRVDMVTNRRGRTVEVHVHPDDLGKVIGRGGRTATALRTLVAGIGGRGIRVDVVDTDQ	0	23.91	54	4	21	4	76	8.2	6.8	2472.19	14.04	4	4		cytoplasm	Pf13083		MSMEG_2436	khpA	A0QV38; msm:MSMEG_2436	0	0	High	High	Not Found	High	1
High	Master Protein	A0QUZ5	Glycerol-3-phosphate dehydrogenase [NAD(P)+] OS=Mycolicibacterium smegmatis (strain ATCC 700084 / mc(2)155) OX=246196 GN=gpsA PE=3 SV=1	MEAAVMGCGAWGTALAKVLADAGNPVTMWARRPEVADEINSEHRNSEYLGDVVLPASIRATSDPEEALRGACTVMLAVPSQKLRANLDNWKHLIEDDVTLVSLAKGIELGTLMRMSQVIVQVTGADPSRVGVVSGPNLASEIADEQPAATVIACSDSGRAVTLQRAMATGYFRPYTNPDVIGAEVGGACKNVIALACGMAVGVGLGENTVAALITRGLAEIMRLGIALGATPATLAGLAGVGDLVATCTSPHSRNRTFGERLGKGGTMESALAAAGGHVAEGVASCESVLALASSYGVEMPLTDAVHRVCHKGLSVHEAVALLLGRSTKPE	0	21.179	20	6	24	6	331	33.9	5.64	2213.24	14.33	6	6		cytoplasm	Pf01210, Pf07479, Pf20618		MSMEG_2393	gpsA	A0QUZ5; msm:MSMEG_2393	0	0	High	High	High	High	1
High	Master Protein	A0QV18	Cell division initiation protein OS=Mycolicibacterium smegmatis (strain ATCC 700084 / mc(2)155) OX=246196 GN=MSMEG_2416 PE=4 SV=1	MYRVFEALDELGAIVEEARGVPMTAGCVVPRGDVLELIDDIKDAIPGELDDAQDVLDARDSLLREAKEHSESVISGANAEADSVLSHARAEADRLLADAKAQADRMVAEARQHSERMVTEAREEAARLAAAAKREYEASTGRAKAEADRLIENGNISYEKAIQEGIKEQQRLVSQTEIVATANAEATRLIDAAHAEADRLRGECDIYVDSKLAEFEEFLNGTLRSVGRGRHQLRTTAGTHDYVTR	0	19.813	16	3	13	3	245	26.8	4.89	849.96	8.13	2	3		cytoplasm		66733830	MSMEG_2416	sepIVA	A0QV18; msm:MSMEG_2416	0	0	High	High	Peak Found	High	1
High	Master Protein	A0QRA5	ABC-type molybdenum transport system, ATPase component OS=Mycolicibacterium smegmatis (strain ATCC 700084 / mc(2)155) OX=246196 GN=MSMEG_1046 PE=4 SV=1	MPTTGEDAADNPDLLIDFARVTLRRGGNTLVGPITWAVELDERWVVIGPNGAGKTSLLRIAAATEHPSSGTAYVLGERLGRTDMAELRSRVGLSSSALSQRIPDDEIVRDLVVSAGYAVLGRWREQYDDVDYEQAVNMLESVGAEHLAERRYGTLSEGERKRVLIARSLMTDPELLLLDEPAAGLDLGGREDLVARLTDLAADPDAPAMVLVTHHVEEIPVGFSHGLILSEGKVVASGLLTDVLTSENLSKAFGQAIALEVIDGRYFARRVRSRAAHRRRND	0	18.94	19	4	12	4	282	30.6	5.19	1234.2	2.91	4	3	Thought to be involved in active transport of undetermined substrate (possibly iron) across the membrane. Responsible for energy coupling to the transport system.	cytoplasmic membrane	Pf00005	66733740	MSMEG_1046; MSMEG_2326		A0QRA5; msm:MSMEG_1046; msm:MSMEG_2326	0	0	High	High	High	High	1
High	Master Protein	A0QUE0	Superfamily protein I DNA or RNA helicase OS=Mycolicibacterium smegmatis (strain ATCC 700084 / mc(2)155) OX=246196 GN=MSMEG_2174 PE=1 SV=1	MSGRDYEDELQSERDYVAGLYARLDAERAQSQRRYAAALREHGGTAVERDAEVRALAKDIARLNVADNGLCFGRLDTLDDARLYIGRLGIFDRDNDFEPLLLDWRAPMARPFYVATAANPENMRRRRQFHTLGRKVVDFTDEILGRPTGAEHDATNDAALLAAVNAPRGEGMRDIVATIQAEQDQVIRLDHTGVLVIEGGPGTGKTVVALHRVAYLLYTYRKQMERHGVLVVGPTPAFLDHIGRVLPSLGESDAVFMTPGDFVPGLHVTAEDTPEAAEVKGSLKILDVLKAAVADRQELPSEPIPIDLSDVTMRIDAETAKWARDEARKTGLPHNEARAEFVDVVTYVVTERAVARIGRGWLTRDDKHAWEKMRADVVGELEDHEQFNAALDALWPILT…	0	18.64	10	7	25	7	736	81.1	4.86	1592.63	2.26	6	7	replication, recombination & repair	cytoplasmic membrane	Pf13245	66733596	MSMEG_2174		A0QUE0; msm:MSMEG_2174	0	0	High	High	High	High	1
High	Master Protein	A0R2R8	Aminotransferase class-III OS=Mycolicibacterium smegmatis (strain ATCC 700084 / mc(2)155) OX=246196 GN=MSMEG_5211 PE=4 SV=1	MSAERSTVGFNFLAEPELPAPQVSEAQAEQILATHYGLQAKAASLGSQQDKNFLVTQGDETVGVLKIANPAFNETELEAQDLAAELIAAAEPTLRIAVPIPNVRGEKRTAVTGLLESRQATAYVRLLRFLPGDALMQRGYLRPSTVAELGALAGRVTRALAEFSHPGLDRILQWDLRYGAEVVATLASHVDDPARRDRLEATTRDAWARIEPFADSLPHQAIHMDLTDANVVVSHEPGGVVRPDGIIDFGDLTDSWTVGELAITLSSVLQHPGATPTSVLPGIRAFHAVRPLSVDEAMVLWPLLVLRTAVLNVSGAQQAAIDPDNAYVTENADGEWQMFEAATSVPLDVMTALITADLGFDCAAPELGALTPMITGLEADAVTTLDLGTVSDTLDSAFT…	0	18.363	6	6	23	6	977	104.5	4.89	1830.79	6.41	6	6	Amino acid transport and metabolism	cytoplasm (PSORTb)	Pf00202, Pf01636	66736525	MSMEG_5211		A0R2R8; msm:MSMEG_5211	0	0	High	High	High	High	1
High	Master Protein	A0R7J6	R3H domain-containing protein OS=Mycolicibacterium smegmatis (strain ATCC 700084 / mc(2)155) OX=246196 GN=MSMEG_6941 PE=4 SV=1	MTDAQTTDPGADQDDKVETTAPAVGAEDDLEERLVAEGEIAGDYLEELLDLLDFDGDIDLDVEGDRAVVSIDGGNDLSKLVGRKGEVLDALQELTRLAVHQKTGERSRLMLDIARWRRRRRDELAALGEKVARRVLETGQREELAPMTPFERKIVHDAVAAIDGVRSESEGVEPSRRVVILLG	0	18.33	26	5	18	5	183	20.1	4.63	1554.97	8.45	5	5	Conserved protein similar to jag/KhpB protein	cytoplasm (PSORTb)	Pf01424, Pf13083	66738187	MSMEG_6941		A0R7J6; msm:MSMEG_6941	0	0	High	High	Not Found	Peak Found	1
High	Master Protein	A0QU53	Putative acyl-CoA dehydrogenase OS=Mycolicibacterium smegmatis (strain ATCC 700084 / mc(2)155) OX=246196 GN=MSMEG_2080 PE=3 SV=1	MAINLELPRKLQAVVEKGHQGAAEMLRPISRKYDLAEHAYPVELDTLANLFEGISSAKTISFAGAEAFRDDANGSGKDATVNGANMSALLNALEISWGDVALLLSVPRQGLGNAAISSVATPEQLERLGKDVWAAMAITEPGFGSDSAAVSTTAVLDGDEYVINGEKIFVTAGSRATHIVVWATLDKSLGRAAIKSFIVPREHPGVTVERLERKLGIKASDTAVIRFENVRIPKDNLLGDPEIHVEKGFAGVMETFDNTRPIVAAMAVGIARAALEDLRAILTDAGVEISYDKPAHAQSAAAAEFLRMEADWEAGYLLTVRSAWQADNNIPNSKEASMGKAKAARVASDITLKAVEMAGTTGYSEQTLLEKWARDSKILDIFEGTQQIQQLVVARRLLG…	0	17.434	14	6	18	6	406	43.5	5.35	1228.94	1.91	6	6	lipid degradation		Pf00441, Pf02770	66733508	MSMEG_2080		A0QU53; msm:MSMEG_2080	0	0	High	High	High	High	1
High	Master Protein	A0QQ17	Iron-sulfur cluster binding protein OS=Mycolicibacterium smegmatis (strain ATCC 700084 / mc(2)155) OX=246196 GN=MSMEG_0594 PE=4 SV=1	MSTTFLGSPGLGNLRGDESFPHAARGALANSQLRRNIGHATQTIRGKRLRAVAECDDWEDLRAAGSALKQDVMARLPELLEQLESNVTARGGVVHWARDADEANRIVTDLIRATGSDEVVKVKSMATQEIGLNEHLEAQGIAAFETDLAELIVQLGHDKPSHILVPAIHRNRSEIREIFSREMPDAGELSDDPRVLAMAARAHLRRKFLTARVAISGANFGVAETGTLAVVESEGNGRMCLTLPETLITVMGIEKIVPTFADLEVFMQLLPRSSTAERMNPYTSMWTGVHPGDGPQEFHLVLLDNGRTRVLADEVGRAALHCIRCSACLNVCPVYERTGGHAYGSVYPGPIGAILSPQLTGTTGHDDPNASLPYASSLCGACFEACPVRIDIPSILVHL…	0	16.851	13	6	16	6	489	53	6.73	1150.92	2.08	6	6	lactate oxidation, Electron transport chain		Pf02589, Pf11870, Pf13183	66738772	MSMEG_0594		A0QQ17; msm:MSMEG_0594	0	0	High	High	High	Peak Found	1
High	Master Protein	A0R3C8	Ribose-phosphate pyrophosphokinase OS=Mycolicibacterium smegmatis (strain ATCC 700084 / mc(2)155) OX=246196 GN=prs PE=1 SV=1	MATDWTDNRKNLMLFAGRAHPELADQVAKELDVAVTAQTARDFANGEIFVRFDESVRGCDAFVLQSHPAPLNQWLMEQLIMIDALKRGSAKRITAILPFYPYARQDKKHRGREPISARLVADLLKTAGADRIVSVDLHTDQIQGFFDGPVDHMRAQKLLTGYIGEHYADEDMVVVSPDSGRVRVAEKWADSLGGVPLAFIHKTRDPLVPNQVKSNRVVGDVKGKTCILTDDMIDTGGTIAGAVNLLREDGAKDVIIAATHGVLSDPAPQRLAECGAREVIVTNTLPITEDKRFPQLTVLSIAPLLANTIRAVFENGSVTGLFDGSA	0	16.798	23	7	20	7	326	35.5	6.19	1632.34	0	7	7	Catalyzes the formation of PRPP from ATP and ribose 5-phosphate. PRPP is then used in various biosynthetic pathways, as for example in the formation of purines, pyrimidines, histidine and tryptophan. [catalytic activity: ATP + D-ribose 5-phosphate = AMP + 5-phospho-alpha-D-ribose 1-diphosphate]	cytoplasm	Pf13793, Pf14572	66736730	MSMEG_5427	prs	A0R3C8; msm:MSMEG_5427	0	0	High	High	Peak Found	High	1
High	Master Protein	A0QVL0	Pyridine nucleotide-disulphide oxidoreductase family protein OS=Mycolicibacterium smegmatis (strain ATCC 700084 / mc(2)155) OX=246196 GN=MSMEG_2611 PE=3 SV=1	MEHYDLAIIGTGSGNSIVDDRYAGKKVAICEQGTFGGTCLNVGCIPTKMFVYAAEVAHSVRTSARYGVDAHIDKVRWPDIVERVFGRIDPIAAGGEDYRRSDPNITVYSSHTRFGPKTDDGRYTLRTESGEEFTSDQVVIAAGSRTYIPPAVVDCGVKYHTSDDIMRIPELPTDLVIIGGGFVSAEFAHVFSALGVHVTIVVRGDGLLTHCDETICHRFNEIAATKWDIRTHENVIGSHQDGDRIVLELDDGKTVAADTLLVATGRVPNGDLLDAELAGVEVDEDGRVIVDQYQRTTARGVFALGDVSSDYQLKHVANHEARVVKENLLRDWDDTASLVASDHRFVPSAVFTDPQVATVGLTEAEARAAGHDIVVKVQNYGDTAYGWAMEDTTGIAKLI…	0	14.702	8	4	18	4	461	49.9	5.21	1447.02	4.41	4	4	, product: NADPH-dependent mycothiol reductase Mtr	cytoplasm	Pf02852, Pf07992	66734021	MSMEG_2611		A0QVL0; msm:MSMEG_2611	0	0	High	High	High	High	1
High	Master Protein	A0QXI0	tryptophan synthase OS=Mycolicibacterium smegmatis (strain ATCC 700084 / mc(2)155) OX=246196 GN=MSMEG_3309 PE=3 SV=1	MTLHADAAHPDLVTVEVPTHWYNLAAELDQPIPPHLHPATKEPVGPDDLAALFPSGLIAQEVSTEAYIAIPDPVREIYSMWRPSPLIRARRFEKALNTGAHIYVKYEGVSPVGSHKTNSAVAQAYYNSVDGVRKLTTETGAGQWGSALAFAGAQFGLEIEVWQVRASYESKPYRGHLIRTYGGVVHSSPSELTESGRAILAKDPNTTGSLGMAVSEAVEVAAGDPDTRYALGSVLNHVVLHQSVIGQEAVAQLAAVEPNGADLVFGCAGGGSNLAGLAFPFLREKIHGRSDPKVIAAEPAACPSITQGEYRYDHGDVAGLTPLLKMHTLGMDFVPDPIHAGGLRYHGMAPALSHTVELGLVQGVAISQHDAFSAGVQFARTQGIVPAPESTHAIAAAAA…	0	14.46	10	3	10	3	433	45.7	5.82	1133.9	5.86	3	3	unknown	cytoplasm	Pf00291	66734704	MSMEG_3309		A0QXI0; msm:MSMEG_3309	0	0	High	High	High	Peak Found	1
High	Master Protein	A0QPG1	NAD dependent epimerase/dehydratase family protein OS=Mycolicibacterium smegmatis (strain ATCC 700084 / mc(2)155) OX=246196 GN=MSMEG_0386 PE=4 SV=1	MVENQYRFFTTLQANGRRRLLSNTVLITGGAGFIGSALAQRLTHEGYEVAVMDLLHPQVHARGSKVDLPRSVRLFTGDVTHAPDWDAVLRLFQPAQVVHLAAETGTAQSLSEATRHSSVNVVGTTQLLDALSRADLVPDQIVLASSRAVYGEGEWRTATDSTFYPLPRSHAQLAAGRWDPVGPNGEHAVPLPSCASRTEPRPTNVYAATKLAQEHVLTAWTAAHDTKLSVLRLQNVYGPGQSLTNSYTGIVALFARLAREQQTLEVYEDGNILRDFVFIEDVVEALYAAIRRPADQRRCLDIGSGVGSSIHALAQKVAGICGAPTPKVVGKFRDGDVRAASCDIEPARMELDWRPKWTLDDGLPALLDWIAKSDVSH	0	14.172	12	3	7	3	377	41.1	6.8	786.21	2.32	3	3	cellular metabolism	cytoplasm	Pf01370		MSMEG_0386		A0QPG1; msm:MSMEG_0386	0	0	High	High	Not Found	Peak Found	1
High	Master Protein	A0R4S6	4-hydroxy-2-oxovalerate aldolase 2 OS=Mycolicibacterium smegmatis (strain ATCC 700084 / mc(2)155) OX=246196 GN=bphI-2 PE=3 SV=1	MSDIFFNPIWDVRMTDTSLRDGSHHKRHQFTGEEVRSIVAALDAAGVPVIEVTHGDGLGGSSFNYGFSKTPEQELIKIAAETAKESKIAFLMLPGVGTKEDIKEAQNNGGSICRIATHCTEADVSIQHFGLARELGLETVGFLMMAHTISPEKLAQQARIMADAGCQCVYVVDSAGALVLEGVRDRVQALVAELGSDAQVGFHGHENLGLGVANSVEAVRAGAKQIDGSCRRFGAGAGNAPVEALIGVFDKIGVKTGIDFFDIADAAEEVVAPAMPAECLLDRNALIMGYSGVYSSFLKHAIRQSERYGVPAHQLLHRAGQRKLIGGQEDQLIDIALEIKREQEAAASK	0	13.045	10	4	18	4	349	37.2	5.64	1365.48	4.1	4	4	lipid catablism	cytoplasm	Pf00682, Pf07836	66737224	MSMEG_5937; MSMEI_5778	bphI-2	A0R4S6; I7GF57; msg:MSMEI_5778; msm:MSMEG_5937	0	0	High	High	High	High	1
High	Master Protein	A0QV82	DUF3500 domain-containing protein OS=Mycolicibacterium smegmatis (strain ATCC 700084 / mc(2)155) OX=246196 GN=MSMEG_2481 PE=4 SV=1	MTSNFREYLFAPDHPRLAELRELDAYAYRTVARRPGTFTGDLVAGWTPLYKNEFRGVTEDGTLREDVHCLEPARAGEAAPVPEMVAAAADLLAGLDDESRERIRYRVDAPEWQTWANPEFMQFDTGIRLEFQSEDVRRKALRLMASSLSPQGYELARNMMLINGFLGEVVGLPGILNEFSYNMAIYGTPHETRPWGWQVFGHHLAVNCFVVDGRMVISPLFLGAEPNEIDEGEHAGVTSFGTRIELGLALMAELTPEQRCAATVYEQMVDPAMPPGRVHPGDERHLAGAFQDNRQIPFEGVRVADLSCRAQELVLEIVEQFVALLPDGPRAARMREVRKMLSQTWFSWIGGHRPGDVFYYRVQSPVIIAELDHHCGVFLDYDTPKPFHIHTVVRTPHGN…	0	13.009	9	4	11	4	414	46.9	5.58	813.92	0	4	4	unknown	cytoplasmic membrane	Pf12006	66733893	MSMEG_2481		A0QV82; msm:MSMEG_2481	0	0	High	High	High	Peak Found	1
High	Master Protein	A0QWS9	Guanylate kinase OS=Mycolicibacterium smegmatis (strain ATCC 700084 / mc(2)155) OX=246196 GN=gmk PE=3 SV=1	MTVGRGAGQRATDGPARARVVVLSGPSAVGKSTVVRCLRERLPDLYFSVSVTTRAPRPGEVDGVDYTFVSPERFQQLIDDGELLEWAEIHGGLHRSGTPAAPVREATRAGRPVLIEVDLAGARAVKQAMPEVVSVFLAPPSWDELVRRLSGRGTETPEVMARRLDTARAEMAAQSDFDRVVVNRQLDSACAELVSLLVDS	0	12.863	21	3	16	3	200	21.6	6.07	1522.14	11.71	3	3		cytoplasm	Pf00625	66734457	MSMEG_3051	gmk	A0QWS9; msm:MSMEG_3051	0	0	High	High	High	High	1
High	Master Protein	A0QWS2	Dihydroorotase OS=Mycolicibacterium smegmatis (strain ATCC 700084 / mc(2)155) OX=246196 GN=pyrC PE=3 SV=1	MRDHNSTAPVLIRGVKPYGEGDPVDVLVDDGQIARIGADLPVPETADVIDARGQVLLPGFVDLHTHLREPGREYAEDIETGSAAAALGGYTAVFAMANTDPVADTVVVTDHVWRRGQEVGLVDVHPVGAITMGLKGAQLTEMGLMAAGAGQVRMFSDDGVCVENPLVMRRALEYATGLGVLIAQHAEEPRLTVGAVAHEGPIAARLGLAGWPRAAEESIVARDALLARDAGARVHICHASTAGTVELLKWAKAQGISITAEVTPHHLLLDDSRLETYDGRNRVNPPLREAEDAAALRQALADGVIDCVATDHAPHAEHEKCCEFSVARPGMLGLQTALSVVVETMVRPGLLTWRGVAKVMSEAPAAIVGLPDQGRPLEVGEPANLTVVDPDATWTVAGT…	0	12.828	9	4	14	4	444	46.5	5.17	1018.65	0	4	4	Involved in pyrimidine biosynthesis (third step) [catalytic activity: (S)-dihydroorotate + H(2)O = N-carbamoyl-L-aspartate]	cytoplasm	Pf01979	66734451	MSMEG_3044	pyrC	A0QWS2; msm:MSMEG_3044	0	0	High	High	High	High	1
High	Master Protein	P0CH36	NADP-dependent alcohol dehydrogenase C 1 OS=Mycolicibacterium smegmatis (strain ATCC 700084 / mc(2)155) OX=246196 GN=adhc1 PE=1 SV=1	MSTVSAYAATSATEPLTKTTITRRAVGPHDVAFDIHFAGICHSDIHTVKAEWGVPNYPVVPGHEIAGVVTEVGSEVTKYKVGDRVGVGCFVDSCRECDNCKAGLEQYCTGTGMVGTYNAIDRDGTPTHGGYSGAIVVDENYVLRIPDSLPLDAAAPLLCAGITTYSPLRHWNAGPGKKVAVIGLGGLGHVAVKLAKAMGADVTVLSQSLKKMEDGLRLGASAYYATSDPETFDKLAGSFDLILNTVSANLDLGAYLGLLKLDGALVELGLPEHPMEVPAFPLLAQRRNLTGSMIGGIPETQEMLDFCAEHDVRPEIEIITPDYINEAYERVLASDVRYRFVIDTASLRS	0	12.787	14	4	16	4	349	37.2	5.24	1235.25	3.51	4	3	a primary alcohol + NADP+ = an aldehyde + H+ + NADPH	cytoplasm	Pf00107, Pf08240	66733732	MSMEG_1037; MSMEI_1007	adhc1	A0QR97; I7FIW6; msg:MSMEI_1007; msm:MSMEG_1037; P0CH36; Q9AE96	0	0	High	High	High	High	1
High	Master Protein	A0R083	Glutamine synthetase OS=Mycolicibacterium smegmatis (strain ATCC 700084 / mc(2)155) OX=246196 GN=glnA PE=1 SV=1	MDRQKEFVLRTLEERDIRFVRLWFTDVLGYLKSVAIAPAELEGAFEEGIGFDGSSIEGFARVFESDTVARPDPSTFQVLPWKTSDGNHYSARMFCDITMPDGSPSWADSRHVLRRQLAKASDLGFTCYVHPEIEFFLLKPGPNDGTPPEPADNGGYFDQAVHDAAPNFRRHAIEALEQMGISVEFSHHEGAPGQQEIDLRYADALSMADNVMTFRYLVKEVALADGVRASFMPKPFAEHPGSAMHTHMSLFEGDTNAFHSPDDPLQLSDVAKSFIAGILEHANEISAVTNQWVNSYKRLVHGGEAPTAASWGAANRSALVRVPMYTPHKVSSRRVEVRSPDSACNPYLTFAVLLAAGLRGVEKGYVLGPQAEDNVWSLTQEERRAMGYRELPTSLGNAL…	0	12.689	9	3	10	3	446	49.8	5.38	1019.12	5.14	3	3	Involved in glutamine biosynthesis [catalytic activity: ATP + L-glutamate + NH(3) = ADP + glutamine + orthophosphate]	cytoplasm	Pf00120, Pf03951	66735639	MSMEG_4294; MSMEI_4193	glnA	A0R083; I7FGW9; msg:MSMEI_4193; msm:MSMEG_4294	0	0	High	High	High	Peak Found	1
High	Master Protein	A0QQX7	3-hydroxybutyryl-CoA dehydrogenase OS=Mycolicibacterium smegmatis (strain ATCC 700084 / mc(2)155) OX=246196 GN=MSMEG_0912 PE=4 SV=1	MSNAIERVGVVGAGQMGSGIAEVSARAGVDVLVYDTTDAFVTAGRNRITKSLERAVSAGKVTEREKDEALGRLRFTTSLADMADRQLVIEAVIEDENIKGEIFAELDRVITDPDAVLASNTSSIPIMKIAASTENPERVLGLHFFNPVPVLPLVELVSTLVTSEAAADRVEQFAGSVLGKQVVRCSDRSGFVVNFLLVPYLLSAIRMVEGGVATIEDVDKAVVAGLSHPMGPLRLSDLVGLDTLKLIADKMFDEFKEPLYAAPPLLLRMVEAGQLGKKTGKGFYTY	0	12.606	16	4	14	4	286	30.7	5.06	1036.16	1.75	4	4	Butyrate/butanol-producing pathway [catalytic activity: (S)-3-hydroxybutanoyl-CoA + NADP+ = 3-acetoacetyl-CoA + NADPH], product; 3-hydroxybutyryl-CoA dehydrogenase FadB2 (beta-hydroxybutyryl-CoA dehydrogenase) (BHBD)	cytoplasm	Pf00725, Pf02737	66739080	MSMEG_0912		A0QQX7; msm:MSMEG_0912	0	0	High	High	High	High	1
High	Master Protein	A0QYE7	6-phosphogluconate dehydrogenase, decarboxylating OS=Mycolicibacterium smegmatis (strain ATCC 700084 / mc(2)155) OX=246196 GN=gnd PE=3 SV=1	MTASSTPSSTTGTAQIGVTGLAVMGSNIARNFARHGYTVALHNRSIAKTDALLAEHGSEGKFVRSETIAEFIDALEKPRKVLIMVKAGEATDAVIDELADAMEPGDIIIDGGNALYTDTIRREAAIRARGLHFVGAGISGGEEGALNGPSIMPGGPAESYESLGPLLEEISAHVDGVPCCTHIGPDGAGHFVKMVHNGIEYSDMQLIGEAYQLLRDGLGMSAGEIADVFEEWNRGDLDSFLVEITAKVLRQTDAKTGKPLVDVIVDEAEQKGTGRWTVKSALDLGVPVTGIAEAVFARALSGSVPQRKATVGLASGALGATPSDAADFIEAVRRALYASKIVAYAQGFNQIQAGSAEYNWNLTPGDLATIWRGGCIIRAKFLNRIKDAYDAEPDLPTLL…	0	12.134	7	3	10	3	488	51.8	5.21	909.29	1.92	3	3	Involved in hexose monophosphate shunt (pentose phosphate pathway) [catalytic activity: 6-phospho-D-gluconate + NADP+ = D-ribulose 5-phosphate + CO2 + NADPH]		Pf00393, Pf03446	66735016	MSMEG_3632	gnd	A0QYE7; msm:MSMEG_3632	0	0	High	High	Not Found	High	1
High	Master Protein	A0QYG9	Protein translocase subunit SecA 2 OS=Mycolicibacterium smegmatis (strain ATCC 700084 / mc(2)155) OX=246196 GN=secA2 PE=1 SV=1	MPKTSSAKPGRLSSKFWKLLGASTERNQARSLSEVKGAADFEKKAADLDDEQLTKAAKLLKLEDLAGASDITQFLAIAREAAERTTGLRPFDVQLLAALRMLAGDVVEMATGEGKTLAGAIAAAGYALGGRRVHVITINDYLARRDAEWMGPLLKALGLTVGWITADSTADERREAYQCDVTYASVNEIGFDVLRDQLVTDVADLVSPNPDVALIDEADSVLVDEALVPLVLAGTSHREQPRVEIIRMVGELEAGKHYDTDAESRNVHLTEAGARVMEAKLGGIDLYSEEHVGTTLTEINVALHAHVLLQRDVHYIVRDDAVHLINASRGRIASLQRWPDGLQAAVEAKEGIETTETGEVLDTITVQALINRYPRVCGMTGTALAAGEQLRQFYKLGVS…	0	12.044	6	5	13	4	784	85.4	5.26	930.13	0	5	5	Involved in protein export. May interact with the SECY/SECE subunits. SECA has a central role in coupling the hydrolysis of ATP to the transfer of PRE-secretory periplasmic and outer membrane proteins across the membrane.		Pf01043, Pf07516, Pf07517	66735036	MSMEG_3654; MSMEI_3567	secA2	A0QYG9; I7FEY4; msg:MSMEI_3567; msm:MSMEG_3654; Q9EZL3	0	0	High	High	Peak Found	Peak Found	1
High	Master Protein	A0QV36	SnoaL-like domain-containing protein OS=Mycolicibacterium smegmatis (strain ATCC 700084 / mc(2)155) OX=246196 GN=MSMEG_2434 PE=4 SV=1	MLSLAEISDRLEIQQLLVDYSTAIDRRQFDDLDAVFTPDAYIDYRAMGGIDGHYPEVKAWLAEVLPAFPAYAHMLGNFDVRITYDPDGQDTASSRTICFNPMVLDGLSPQVLFCGLWYDDQFVRTPEGWRMTRRVETKCFDKVI	0	11.729	26	3	10	3	144	16.5	4.68	844.92	1.83	3	3		cytoplasm	Pf13577	66733848	MSMEG_2434		A0QV36; msm:MSMEG_2434	0	0	High	High	Peak Found	High	1
High	Master Protein	A0QVP7	Sfp-type phosphopantetheinyl transferase OS=Mycolicibacterium smegmatis (strain ATCC 700084 / mc(2)155) OX=246196 GN=MSMEG_2648 PE=4 SV=1	MTDSLLSLVLPDRVASAEVYDDPPGLSPLPEEEPLIARSVAKRRNEFVTVRYCARQALGELGVGPVPILKGDKGEPCWPDGVVGSLTHCQGFRGAVVGRSTDVRSVGIDAEPHDVLPNGVLDAITLPIERAELRGLPGDLHWDRILFCAKEATYKAWYPLTHRWLGFEDAHITFEVDGSGTAGSFRSRILIDPVAEHGPPLTALDGRWSVRDGLAVTAIVL	0	11.608	24	4	11	4	221	23.9	5.31	766.52	0	4	3	, product: Phosphopantetheinyl transferase PptT (CoA:APO-[ACP]pantetheinephosphotransferase) (CoA:APO-[acyl-carrier protein]pantetheinephosphotransferase)	cytoplasmic	Pf01648, Pf17837	66734057	MSMEG_2648		A0QVP7; msm:MSMEG_2648	0	0	High	High	High	High	1
High	Master Protein	A0QWX7	OpcA protein OS=Mycolicibacterium smegmatis (strain ATCC 700084 / mc(2)155) OX=246196 GN=opcA PE=4 SV=1	MIVDLPDTSTNDVNKKITGLREEGGALTLSRVLTLVIAPHTEDLVEDSIEAANFASREHPCRVIVVVPGDRDAAAPRLDAQLRVGHDAGAGEVVVLRLSGELADHSASVVLPFLLPDTPVVAWWPAVAPAVPSEDPLGKLAIRRITDATNGTDPLACIKSRLKAYSPGDTDLAWSRVTYWRALLAAAVDQEPFEPVSSAVVSGLKDEPALDILAGWLASRIDGPVTRAVGELKVELNRPSETVTLSRPQDGITATLSRTGKPAALVPLARREAKECLAEDLRRLDADEIYREALQGIDKVQYV	0	11.497	13	4	14	4	303	32.5	5.06	954.87	0	4	4	May be involved in the functional assembly of glucose 6-phosphate dehydrogenase	unknown	Pf10128, Pf20171	66734503	MSMEG_3100	opcA	A0QWX7; msm:MSMEG_3100	0	0	High	High	Peak Found	Peak Found	1
High	Master Protein	Q3L887	Broad-specificity linear acyl-CoA dehydrogenase FadE5 OS=Mycolicibacterium smegmatis (strain ATCC 700084 / mc(2)155) OX=246196 GN=fadE5 PE=1 SV=1	MSHYKSNVRDQVFNLFEVFGVDKVLGADKFSDLDADTAREMLTEIARLAEGPIAESFVEGDRNPPVFDPETHTVTLPEGFKKSMRALFDGGWDKVGLAEHLGGIPMPRALQWALIEHILGANPAAYMYAMGPGMSEIFYNNGTDEQKKWATIAAERGWGATMVLTEPDAGSDVGAGRTKAVQQPDGTWHIEGVKRFITSADSDDLFENIMHLVLARPEGAGPGTKGLSLFFVPKFHFDHETGEIGERNGVFVTNVEHKMGLKVSATCELSLGQHGIPAVGWLVGEVHNGIAQMFDVIEQARMMVGTKAIATLSTGYLNALEYAKERVQGADMTQMTDKTAPRVTITHHPDVRRSLMTQKAYAEGLRAIYLYTATFQDAEVAQAVHGVDGDLAARVNDLL…	0	11.377	5	3	16	3	611	66.5	5.15	1282.54	5.36	3	3	lipid degradation	cytoplasmic	Pf00441, Pf02770, Pf12418, Pf12806	66738592	MSMEG_0406; MSMEI_0396	fadE5	A0QPI1; I7FWC0; msg:MSMEI_0396; msm:MSMEG_0406; Q3L887	0	0	High	High	Peak Found	High	1
High	Master Protein	A0QX25	DUF58 domain-containing protein OS=Mycolicibacterium smegmatis (strain ATCC 700084 / mc(2)155) OX=246196 GN=MSMEG_3148 PE=4 SV=1	MRPTAGRTVDLPSLQRGEIRDPALSAALRKLELTVRRKLDGVLHGDHLGLLPGPGSEPGESRMYEPGDDVRRMDWSVTARTTTPHVRQMIADRELETWLVVDMSASLDFGTAGCEKRDLAVAAAAAIAFLNSGGGNRLGAVIANGDTMRRVPALSGRMHERELLRAIATTPKAPTGVRGDLSAAIDALRRPERRRGMAVIISDFLGPINWMRPLRAIAGRHEVLGIEILDPRDVELPPVGDVILQDTETGVTREFTVDEQLRHDFEQAAAAHREEVARTLRRCGAPLLSLRTDRDWIADVMRFVANRRRGALAGR	0	11.105	13	4	15	4	315	34.6	9.04	982.29	1.66	4	4		cytoplasmic	Pf01882	66734549	MSMEG_3148		A0QX25; msm:MSMEG_3148	0	0	High	High	High	Peak Found	1
High	Master Protein	A0QZ46	Proteasome subunit alpha OS=Mycolicibacterium smegmatis (strain ATCC 700084 / mc(2)155) OX=246196 GN=prcA PE=1 SV=1	MSFPYFISPEQAMRERSELARKGIARGRSVVALAYSEGVLFVAENPSRSLQKVSELYDRVGFAAVGRFNEFDNLRRGGIQFADTRGYAYDRRDVTGRQLANVYAQTLGTIFTEQAKPYEVELCVAEVAHYGETKAPELYRITYDGSIADEPHFVVMGGTTEPIIAALNESYTENASLQDAVEIAVKALSASAEGAEPRSLGPSTLEVAILDAGRPRRAFRRITGAALEALLPEQPQQADSGDKPTE	0	10.736	11	3	10	3	246	26.9	5.08	748.86	5.93	3	3	Protein degradation	cytoplasm	Pf00227	66735261	MSMEG_3894; MSMEI_3804	prcA	A0QZ46; I7G3V1; msg:MSMEI_3804; msm:MSMEG_3894; O30519	0	0	High	High	Peak Found	Peak Found	1
High	Master Protein	A0QUY3	3-isopropylmalate dehydrogenase OS=Mycolicibacterium smegmatis (strain ATCC 700084 / mc(2)155) OX=246196 GN=leuB PE=3 SV=1	MSSNLKLAVIAGDGIGPEVIAEAVTVLDAVLPGVEKTEYDLGARRYHATGELLSDETIEELRGYDAILLGAIGDPSVPSGVLERGMLLKLRFALDHHVNLRPGRLYPGVTGPLVGNPPIDFVVVREGTEGPYTGNGGALRVGTPHEVATEVSVNTAFGVERVVRDAFARAQDRRKHLTLVHKTNVLAFAGSLWSRTVDRVAQEYPDVEVAYQHIDAATIHMVTDPGRFDVIVTDNLFGDIITDLAAAVCGGIGLAASGNIDATRTNPSMFEPVHGSAPDIAGQGIADPTAAVMSVGLLLSHVGQTEAAARVDKAVSEHLATRGDEKLSTSAVGERIRSLL	0	10.385	7	3	10	3	340	35.8	5.33	848.19	3.66	3	3	Involved in leucine biosynthesis (at the third step) [catalytic activity: 3-carboxy-2-hydroxy-4-methylpentanoate + NAD(+) = 3-carboxy-4-methyl-2-oxopentanoate + NADH (the product decarboxylates to 4-methyl-2-oxopentanoate)].	cytoplasm	Pf00180		MSMEG_2379	leuB	A0QUY3; msm:MSMEG_2379	0	0	High	High	Peak Found	Peak Found	1
High	Master Protein	A0QRB9	Phosphohydrolase OS=Mycolicibacterium smegmatis (strain ATCC 700084 / mc(2)155) OX=246196 GN=MSMEG_1061 PE=4 SV=1	MRQEVTSVDELRAIVGHPNKYVANKVTARLSEVQQDWLAASPLCFVATTDAEGRVDVSPKGDPPGFVRVIDDTTIAIPERPGNKRVDGYLNVLQQPHVGTVFLIPGRGDTLRINGTATILSDADYFDDMVVDGKRPILALEISIEEVFFHCAKAFLRSDTWKPETWNPTAVPSVAQLAKAFKPDMSDKELDEYYAEDNLRKILY	0	10.002	17	3	10	3	204	22.7	5.11	876.16	4.92	3	3		cytoplasm	Pf01243	66732524	MSMEG_1061		A0QRB9; msm:MSMEG_1061	0	0	High	High	Peak Found	High	1
High	Master Protein	A0R7D8	Aldehyde dehydrogenase OS=Mycolicibacterium smegmatis (strain ATCC 700084 / mc(2)155) OX=246196 GN=MSMEG_6874 PE=3 SV=1	MTTDQITVEQLLVNGRRVDGHGEVLDVINPATGQVFARCHCGDAADIDAAVENAQAAFTSGVWRDAPIHHRAKVMNKFADLLEANMEELYRLETLNNGRPITETKAQITRLPEWYRYNAALLLADRTSVVPMAGPYHSYTSRMPLGVVGILSSFNHPLMIASKSLAPALATGNSVVLKPSEQTPLTALVVGQLALEAGIPPGVLNVVPGLGPDAGARLVEHPLVKKAVFTGGTEPGRSIAVATARRFAKATLELGGKSPVVVFDDMDVDVAARGAAFGGFIGAGQTCIAGTRLIVQSTIYQQFVDALVAQAEAIRIGDPALAETQLGPVISERARQRILNYVAIGVEEGATVATGGAAAEVAGMDGFFVKPTVLSNVTNDMRVAREEIFGPVLVVIPFE…	0	9.766	7	3	13	3	500	53.5	5.44	1068.3	5.59	3	3		cytoplasm	Pf00171	66738130	MSMEG_6874		A0R7D8; msm:MSMEG_6874	0	0	High	High	High	High	1
High	Master Protein	Q9X5M1	Diaminopimelate decarboxylase OS=Mycolicibacterium smegmatis (strain ATCC 700084 / mc(2)155) OX=246196 GN=lysA PE=3 SV=1	MNAHPAGPRHAEELHHADVPDKPQSPDEIMLLAPNVWPRNLVRGADGVVTIAGVPVTDLAAKFGTPLFVIDEDDFRTRCRDIAAAFGGGQYVHYAAKAFLCSEIARWVDEEGLSLDVATGGELAVALHAGFPASRITVHGNNKSVAELTAAVQAGVGHVVLDSEIEIERLDQIAGAAGVVQDVLVRVTVGVEAHTHEFISTAHEDQKFGLSLATGAAMNAIRRVFATDNLRLVGLHSHIGSQIFDVAGFEIAAHRVIGLLRDVVAEFGVEKTSQMSIVDLGGGLGISYLPHDDPPPMKELADKLLEIVRTESAAVGLPTPKLVVEPGRAIAGPGTITLYEVGTVKDVAVSQTAHRRYVSVDGGMSDNIRTSLYAAQYDARLVSRVSDAPPALARIVGKH…	0	9.46	9	4	16	4	474	50.3	5.49	998.09	3.47	4	4		cytoplasm	Pf00278, Pf02784	66736279	MSMEG_4958; MSMEI_4831	lysA	A0R222; I7GD81; msg:MSMEI_4831; msm:MSMEG_4958; Q9X5M1	0	0	High	High	Peak Found	High	1
High	Master Protein	A0R7G3	DUF5318 domain-containing protein OS=Mycolicibacterium smegmatis (strain ATCC 700084 / mc(2)155) OX=246196 GN=MSMEG_6901 PE=4 SV=1	MSCDAVAPRCPTGRRTLVNVRLQRQVVDYALRRRSLLAEVYSGRTGVSEVCDANPYLLRAAKFHGKQSSVMCPICRKEQLTLVSWVFGEHLGPVSGSARTAEELVLLASRYDEFAVHVVEVCRTCSWNHLVKSYVLGAPRPPEARRPKRTPSTRKSARTASE	0	9.408	21	3	14	3	162	18.1	9.79	1112.39	4.6	3	3		cytoplasm	Pf17249		MSMEG_6901		A0R7G3; msm:MSMEG_6901	0	0	High	High	High	Not Found	1
High	Master Protein	A0R5K0	ATPase family protein associated with various cellular activities (AAA) OS=Mycolicibacterium smegmatis (strain ATCC 700084 / mc(2)155) OX=246196 GN=MSMEG_6219 PE=4 SV=1	MTQPATTVDADTARNALLALRNEIAKVVVGQDAVISGLVIALLCRGHVLLEGVPGVAKTLLVRTLAAALQLEFKRVQFTPDLMPGDVTGSLVYDARTAEFEFRQGPVFTNLLLADEINRTPPKTQAALLEAMEERQVSVDGQPRPLPDPFIVAATQNPIEYEGTYQLPEAQLDRFLLKLNVPLPPREQEIAILSRHAHGFDPRNLSAVQPVAGPAELAAGRDAVSRVRVADEVLGYIVDIVGATRHSPALQLGVSPRGATALLATSRSWAWLCGRNYVTPDDVKAMARSTLRHRIALRPDAELEGATPDGVLDGILAAVPVPR	0	9.167	7	2	12	1	323	34.8	5.92	1242.18	8.85	2	2	nvolved in transcriptional mechanism; regulates methanol dehydrogenase		Pf07726, Pf17863	66737502	MSMEG_6219	moxR2	A0R5K0; msm:MSMEG_6219	0	0	High	High	Not Found	High	1
High	Master Protein	A0QW11	OB-fold nucleic acid binding domain protein OS=Mycolicibacterium smegmatis (strain ATCC 700084 / mc(2)155) OX=246196 GN=MSMEG_2768 PE=4 SV=1	MATAERYLRRLTRRLTEDPEQLDVEELSEEAAITGAQKAIDCQRGQEVTMVGTLRSVECNTKACSGGVKAELFDGTDTVVLVWLGQRRIPGIEQGRTLRVHGRVGKLENGAKAIYNPHYEIQK	0	9.017	25	3	19	3	123	13.7	7.25	1241.42	0	3	3		cytoplasm (PSORTb)	Pf17191	66734170	MSMEG_2768		A0QW11; msm:MSMEG_2768	0	0	High	High	High	High	1
High	Master Protein	A0R597	Inorganic pyrophosphatase OS=Mycolicibacterium smegmatis (strain ATCC 700084 / mc(2)155) OX=246196 GN=ppa PE=3 SV=1	MEFDVVIEIPKGSRNKYEVDHETGRVKLDRYLYTPMGYPTDYGFFENTLGEDGDPLDALVLLTESVFPGCVVEARPVAMFKMTDEAGGDDKLLCVPAGDPRWDHIQDVGDISQFELDAIKHFFVHYKDLEPGKFVKTADWEGRAEAEAELQRSVERFKSSGH	0	8.986	17	3	10	3	162	18.3	4.75	851.4	5.73	3	3	Involved in the function of cellular bioenergetics [catalytic activity: pyrophosphate + H(2)O = 2 orthophosphate]	cytoplasm	Pf00719	66737398	MSMEG_6114	ppa	A0R597; msm:MSMEG_6114	0	0	High	High	Peak Found	High	1
High	Master Protein	A0QWN3	Aspartate--tRNA(Asp/Asn) ligase OS=Mycolicibacterium smegmatis (strain ATCC 700084 / mc(2)155) OX=246196 GN=aspS PE=1 SV=1	MLRTHAAGSLRPADAGQTVTLAGWVARRRDHGGVIFIDLRDASGVSQVVFREGDVLAAAHRLRAEFCVAVTGVVEVRPEGNENPEIPTGQIEVNATELTVLGESAPLPFQLDEQAGEEARLKYRYLDLRREGPGNALRLRSKVNAAARSVLAEHDFVEIETPTLTRSTPEGARDFLVPARLQPGSFYALPQSPQLFKQLLMVAGMERYYQIARCYRDEDFRADRQPEFTQLDMEMSFVEADDVIAISEQVLKAVWATIGYDLPLPLPRISYEEAMRRFGSDKPDLRFGIELVECTEYFKDTTFRVFQAPYVGAVVMPGGASQPRRTLDGWQEFAKQRGHKGLAYVLVGEDGTLGGPVAKNLSDAERDGLVAHVGANPGDCIFFAAGPAKGARALLGATR…	0	8.958	3	2	10	2	598	65.1	5.19	693.63	1.61	2	2	Involved in translation mechanism [catalytic activity: ATP + L-aspartate + tRNA(asp) = AMP + pyrophosphate + L-aspartyl-tRNA(asp)]	cytoplasm	Pf00152, Pf01336, Pf02938	66734410	MSMEG_3003; MSMEI_2928	aspS	A0QWN3; I7G141; msg:MSMEI_2928; msm:MSMEG_3003	0	0	High	High	Not Found	High	1
High	Master Protein	A0QRD2	Oxidoreductase, short-chain dehydrogenase/reductase family protein OS=Mycolicibacterium smegmatis (strain ATCC 700084 / mc(2)155) OX=246196 GN=MSMEG_1073 PE=3 SV=1	MSKHPLRRLTDNLFLASMRPPVTDQLIQLRAARDAVDLTGKRVLITGASSGIGAAAARKFAERGARVIVVARRAELLDEVAGGITASGGDAKARPCDLTDLDAIDALVAEIESDHGGLDILVNNAGHSIRRPLADSLERWHDIERTMTLNYYSPLRLIRGFAPGMRERGAGHIINVSTWGVLSEASPLFSVYQASKAALSAVSRVIETEWGDGGVHSTTLYYPLVDTPMIKPTRAFDGLPALSADEAADWMITAARHRPVQIAPRVAVGARALNAVAPGVVNAVMKRQSAQPDGVGRRPIFPAG	0	8.268	11	4	14	4	304	32.5	9.33	993.11	3.62	4	4	probably involved in cellular metabolism		Pf00106	66732537	MSMEG_1073		A0QRD2; msm:MSMEG_1073	0	0	High	High	High	Peak Found	1
High	Master Protein	A0R0N6	Alpha/beta hydrolase OS=Mycolicibacterium smegmatis (strain ATCC 700084 / mc(2)155) OX=246196 GN=MSMEG_4450 PE=4 SV=1	MAQPLSYTRDDVTFMSDGTSCAAWLYRPDGVNNPPIVVLAHGFAAFRELRLDAYAARFAQAGYAALVFDYRHWGASDGQPRRILDIPKQQTDWRAAIAYARSLDNVDTTRLVGWGSSFGGGHVLTLAARDHEFAAAIVQVPHVSGPASAFSQSPKLVARLIAAGLRDQIGAWFGGAPHRVTSIGRPGEFAMMTSPGAYELVEEMAGGEAAEHMRAQLEAENDVAARIALRVPLYSPGRHAAKITAPTLVQLATKDDVTPYAKARKIVARIPNGEVRSYDITHFEPYVDPHFEQIVTDQIDFLNRHVGAGTR	0	7.689	11	3	10	3	311	33.9	7.12	638.29	1.7	3	3			Pf12146	66735783	MSMEG_4450		A0R0N6; msm:MSMEG_4450	0	0	Peak Found	High	High	High	1
High	Master Protein	A0QTF8	dTDP-4-dehydrorhamnose reductase OS=Mycolicibacterium smegmatis (strain ATCC 700084 / mc(2)155) OX=246196 GN=rmlD PE=1 SV=1	MDLINGMGTSPGYWRTPREPGNDHRRARLDVMAQRIVITGAGGMVGRVLADQAAAKGHTVLALTSSQCDITDEDAVRRFVANGDVVINCAAYTQVDKAEDEPERAHAVNAVGPGNLAKACAAVDAGLIHISTDYVFGAVDRDTPYEVDDETGPVNIYGRTKLAGEQAVLAAKPDAYVVRTAWVYRGGDGSDFVATMRRLAAGDGAIDVVADQVGSPTYTGDLVGALLQIVDGGVEPGILHAANAGVASRFDQARATFEAVGADPERVRPCGSDRHPRPAPRPSYTVLSSQRSAQAGLTPLRDWREALQDAVAAVVGATTDGPLPSTP	0	7.589	13	4	10	4	327	34.2	5.24	570.89	0	4	4	nvolved in dTDP-L-rhamnose biosynthesis: converts dTDP-6-deoxy-L-lyxo-4-hexulose to dTDP-L-rhamnose with the concomitant oxidation of NADPH to NADP+ [catalytic activity: dTDP-6-deoxy-L-lyxo-4-hexulose + NADPH = dTDP-L-rhamnose + NADP+	cytoplasm	Pf04321		MSMEG_1825; MSMEI_1782	rmlD	A0QTF8; I7G6I9; msg:MSMEI_1782; msm:MSMEG_1825	0	0	High	High	High	High	1
High	Master Protein	A0R6C4	NTP_transf_9 domain-containing protein OS=Mycolicibacterium smegmatis (strain ATCC 700084 / mc(2)155) OX=246196 GN=MSMEG_6499 PE=4 SV=1	MAVNMGDLFAANLESLRYQPTAKRIRACLGGEPVVDTCAAVLVWEPRRVVPTYAVPRAAISAQLVPAGGDHGDDEIPGFLDPSVPFTAHTCSGTGFDVIAGGENSPAAAFTPDDPDLADYVILDFDSFEWREEDEPVVAHPHDPFHRIDIRRSARQVRIELDGHLLAESTQPMLLFETGLPTRFYLPYDDVVAPLELSQTVTYCAYKGRASYYSVPDGPADIAWTYHEPLHDAVPVRDRICFFDERVDVIIDGQRQNRPVTPWSD	0	7.324	7	2	10	2	265	29.4	4.74	834.55	3.58	2	2		cytoplasm	Pf04248	66737771	MSMEG_6499		A0R6C4; msm:MSMEG_6499	0	0	High	High	High	High	1
High	Master Protein	A0QYQ7	CTP synthase OS=Mycolicibacterium smegmatis (strain ATCC 700084 / mc(2)155) OX=246196 GN=pyrG PE=1 SV=1	MPALRKHPQTATKHLFVTGGVVSSLGKGLTASSLGQLLTARGLQVTMQKLDPYLNVDPGTMNPFQHGEVFVTEDGAETDLDVGHYERFLDRNLSGSANVTTGQVYSSVIAKERRGEYLGDTVQVIPHITDEIKSRILAMAEPDAAGVRPDVVITEVGGTVGDIESLPFLEAARQVRHEVGRENCFFLHVSLVPYLAPSGELKTKPTQHSVAALRSIGITPDALILRCDRDVPEPLKNKIALMCDVDVDGVISTPDAPSIYDIPKVLHREELDAYVVRRLNLPFRDVDWTEWDDLLRRVHEPQETVRIALVGKYIDLSDAYLSVAEALRAGGFKHRAKVEMRWVASDDCETEHGAAAALSDVHGVLIPGGFGIRGIEGKIGAISYARKRGLPVLGLCLGL…	0	7.172	5	3	12	3	590	64.2	5.64	808.18	1.7	3	3	Pyrimidine biosynthesis (last step) [catalytic activity: ATP + UTP + glutamine = ADP + orthophosphate + CTP (ammonia can replace glutamine).]	cytoplasm	Pf00117, Pf06418	66735116	MSMEG_3746; MSMEI_3656	pyrG	A0QYQ7; I7FN26; msg:MSMEI_3656; msm:MSMEG_3746	0	0	High	High	High	High	1
High	Master Protein	A0R184	GntR-family protein transcriptional regulator OS=Mycolicibacterium smegmatis (strain ATCC 700084 / mc(2)155) OX=246196 GN=MSMEG_4659 PE=4 SV=1	MTPTLSVELDRSSPVPLYFQVAQVFEKAILDGQLKPGDRFENELALASRLNLSRPTTRRAIQELVDKGLLVRKRGVGTQVVQTPVHRPVELTSLYDDLARAGQEPATEVLEYTRRPAQADIAERLSIEPGSEIAYMRRLRSSNGQPLALMTNYLPAALAPDEDELARSGLYQSLRARGVHIRLARQRIGAKAADREEARLLDEKPKAPLLVMERTAFDDSGRIVEYGSHAYRASRYYFDTTLVDR	0	6.777	11	3	12	3	245	27.5	8.85	825.01	0	3	2	Involved in transcriptional mechanism.	cytoplasm	Pf00392, Pf07702	66735977	MSMEG_4659		A0R184; msm:MSMEG_4659	0	0	High	High	High	Peak Found	1
High	Master Protein	A0R061	HesB/YadR/YfhF family protein OS=Mycolicibacterium smegmatis (strain ATCC 700084 / mc(2)155) OX=246196 GN=MSMEG_4272 PE=4 SV=1	MTVQDATATETHGVTLTDAAAAKAKALLDQEGRDDLALRIAVQPGGCAGLRYNLFFDDRTLDGDLTAEFGGVTLTVDRMSAPYVQGATIDFVDTIEKQGFTIDNPNATGSCACGDSFN	0	6.591	17	2	10	2	118	12.4	4.41	961.6	4.23	2	2		cytoplasm	Pf01521	66735617	MSMEG_4272		A0R061; msm:MSMEG_4272	0	0	High	High	High	High	1
High	Master Protein	A0QXW7	Short-chain dehydrogenase/reductase OS=Mycolicibacterium smegmatis (strain ATCC 700084 / mc(2)155) OX=246196 GN=MSMEG_3451 PE=3 SV=1	MTARSDQAVRHWFITGASGGLGHHLAECALRQGDRVTATVRRATALADLCDAYGDRLTVEVLDLAEPHDIAPVIERTLLAGPVDIVVNNAGYVVVGAAEEMTVEQIRDQIDVLLMAPMLITRAFLKPMREQGGGRIIQISSMGGQVAVPTHSAYHAAKWGLEGFTESVSREVAEFGIRLTLVEPGGTRTGFASAMQYTVESEPYRQTAVGQTRRVLENADDTAFAGDPAKIAAVIYDSTRNPDPPLRLTLGDDSYHAIRVGLTERLAALDESRELSASVAFTD	0	5.147	6	2	10	2	283	30.5	5.19	574.98	0	2	2		cytoplasm	Pf00106	66734845	MSMEG_3451		A0QXW7; msm:MSMEG_3451	0	0	High	High	Peak Found	High	1
High	Master Protein	A0QYU0	PfkB-family protein carbohydrate kinase OS=Mycolicibacterium smegmatis (strain ATCC 700084 / mc(2)155) OX=246196 GN=MSMEG_3785 PE=4 SV=1	MQQTVRARVACLGEPLVLVSEAGDPHPAGAELNVAVGLAGLGVPASLLGRLGADEYGVLIRAALQQRGIDDSAVETDPARPTGSYSKVTGTDAAGERTTTSRYARAGSAASAMGPDFLDRDEVSAALGAAAIVHCSGITAALSDTCRALMCRLLTDRPGIPGLVSFDVNWREQLWPDADPAVVLDLADRADLVLVGADEAARVAGTGDPVALRRVLPSPATLVVKDGARRAVAVDRDGVTTEVPALRVDVVEPVGAGDAFAAGYLSGLVRGDDTATCLRRGHIGAAATLTVATDWAPPPPAGTLQRLLACSPPEWAATTVTTAGFALPEGM	0	6.623	11	3	9	3	331	33.8	4.93	588.86	0	3	3	other metabolic processes		Pf00294	66735155	MSMEG_3785		A0QYU0; msm:MSMEG_3785	0	0	High	High	High	High	1
High	Master Protein	A0R2Q7	Putative acyl-CoA dehydrogenase OS=Mycolicibacterium smegmatis (strain ATCC 700084 / mc(2)155) OX=246196 GN=MSMEG_5199 PE=3 SV=1	MAEAVIVEAVRSPVGKRNGALSGIHPAELSAQVLNGLVERAGVDPALVDDVIWGCVMQAGEQALDIARTAVLSAGWPETVPGVTVDRQCGSSQQSLHFAVAGVVAGHYDVVVAGGVESMSRTPMGSSLANGGNPYGESFKARYDKTPNQGVGAEMIAEQWGFSRTQLDEFSLRSHEKAAAAQDSGAFSDQIVGIKTKDADGNDTVVLEDGGIRRGGTIEAMAGIKPAFKEDGVIHAGNSSQISDGSAALLITSAEKAKELGLKPIAKVHTAVLAGADPVIMLTAPIPATQKALKKSGLSLDQIGAFEVNEAFAPVPMAWLKDIGADEKKLNPNGGAIALGHPLGGSGARILTTLLYHMRDNNIQYGLQTMCEGGGQANATILELL	0	5.159	5	2	9	2	385	39.8	5.34	619.62	0	2	1			Pf00108, Pf02803	66736514	MSMEG_5199		A0R2Q7; msm:MSMEG_5199	0	0	Peak Found	High	Peak Found	High	1
High	Master Protein	A0R1D1	Enoyl-CoA hydratase OS=Mycolicibacterium smegmatis (strain ATCC 700084 / mc(2)155) OX=246196 GN=MSMEG_4709 PE=3 SV=1	MADSVLVETSDRIAVITVNDPDRRNAVTFEMSAALRSAVEAAEADPDVHAVVVTGAGKAFCAGADLAALGTATEDGLRKIYDGFLAVAHCTLPTIAAVNGAAVGAGLNLALAADVRIAGPHALFDPRFQKLGIHPGGGATWMLQRAAGPEVARAALLFGMRFDAEAAVRHGLALTVADDPLAAARELASGPASAPREVVLATKASMRATANPGVIDTDQHRAAVDIELGPQARSIESPEFAARLAARRK	0	8.928	13	3	8	3	249	25.6	6.06	628.62	2.1	3	3			Pf00378	66736025	MSMEG_4709		A0R1D1; msm:MSMEG_4709	0	0	High	High	High	Peak Found	1
High	Master Protein	A0QTQ8	DEAD/DEAH box helicase OS=Mycolicibacterium smegmatis (strain ATCC 700084 / mc(2)155) OX=246196 GN=MSMEG_1930 PE=3 SV=1	MTQLNHSFAELGVRDEIVRALAENGIEHPFAIQELTLPLALAGDDLIGQARTGMGKTYAFGVPLLHRVSSDENRPLTGAPRALVVVPTRELCLQVYNDLAGAAKHLPTNDGRKFTVTSIYGGRPYEPQIEALRKGVDVVVGTPGRLLDLAQQGHLQLGGLSVLVLDEADEMLDLGFLPDIERILQLTPDSRQAMLFSATMPDPIITLARTFMNQPTHIRAEAPHSAATHDTTAQYAYRAHALDKVELVSRILQARGRGATMVFTRTKRTAQKVSDELAERGFKVGAVHGDLGQGAREKALKSFRTGEIDVLVATDVAARGIDIDDVTHVINYQCPEDEQAYVHRIGRTGRAGKTGVAITLVDWDELARWEMIDKALNLGNPDPAETYSSSPHLYEDLDI…	0	8.454	5	3	8	3	502	54.7	6.79	581.07	3.51	3	3			Pf00270, Pf00271	66733364	MSMEG_1930		A0QTQ8; msm:MSMEG_1930	0	0	High	High	Not Found	Peak Found	1
High	Master Protein	A0R2Q5	Long-chain specific acyl-CoA dehydrogenase OS=Mycolicibacterium smegmatis (strain ATCC 700084 / mc(2)155) OX=246196 GN=MSMEG_5197 PE=3 SV=1	MKRLIYNEEHEAFRQTVKEYIERELVPHSEKWEAERIVDRSAYTAAGKYGLIGFNMPEEFGGGGSDDFRFNAIIDEEIAKSGVHGPALSLHNDVVGPYFKELANDEQRRRWLPGITSGELIIAIAMTEPGAGSDLAGIRTSAVRDGDDWIINGSKTFISSGINCDLCVVVARTDPEAGHKGFSLFVVERGMEGFTRGRKLDKMGLHSQDTSELHFENVRVPHANLLGKEGRGFYHLMTNLPSERLSIAISAIAGARAVFDETLQYCKDRKAFGQPIGSFQHNRFLLAEMETELEVTENYIDRCLQGVVDGELTAVEAAKAKWWATETAKKIVDNCVQLHGGYGYMMEYRVARAYVDGRIQTIFGGTTEIMKEIIGRDLGV	0	6.725	7	3	8	3	380	42.3	5.62	419.26	0	3	3			Pf00441, Pf02770, Pf02771	66736512	MSMEG_5197		A0R2Q5; msm:MSMEG_5197	0	0	High	High	Not Found	Peak Found	1
High	Master Protein	A0R3T9	Bac_luciferase domain-containing protein OS=Mycolicibacterium smegmatis (strain ATCC 700084 / mc(2)155) OX=246196 GN=MSMEG_5592 PE=4 SV=1	MMPKEFRFGVSVRNAESQAQVAATARRAEDLGYNVIVVPDHLGAPAPFPTLTAIAAATDTIRVGTCVLNACFYKPALLARDVTALRDLSDGRFEVGLGAGYVREEFEAAELPFPSARERIDHLRHTTEYLREHVSDVPIMVAGNGDRLLTVAAQTADIVGLTGGDGVPDGDHDPLAERISFLRKAADGRDLELNITFTAIPAAGSEMPDLRLTRRFLGHLTDEQLLRHPGVLAGSASDMADRLRQLRDTYGVSYFIVQIPHIETFAKVIAELR	0	8.403	10	2	8	2	273	29.7	5.66	758.43	2.16	2	2			Pf00296		MSMEG_5592		A0R3T9; msm:MSMEG_5592	0	0	High	High	Not Found	High	1
High	Master Protein	A0R6D9	Maltokinase OS=Mycolicibacterium smegmatis (strain ATCC 700084 / mc(2)155) OX=246196 GN=mak PE=1 SV=1	MSVEFEDWLTQQRWYAGRNRELVSATTAMAVRLRDGLELVLLQANYADGPDERYQVIVATGSGPIDEYSVVATIGIADGQTAYDALYDPDATRYLLSLIDESATVQNVRFVREPDVELPLDAPPRVFGAEQSNTSVVFGEDAIFKLFRRITPGVHPDIELNRVLARAGNPHVARLLGSFETEWEGEPYALGMVTEFAANSAEGWDMATTSTRDLFAEGDLYAEEVGGDFAGEAYRLGEAVASVHACLAHELGTEEVPFPADVMAQRLAAAVDAVPELREHVPQIEERYHKLADTTMTVQRVHGDLHLGQVLRTPKGWLLIDFEGEPGQPLDERRRPDTPVRDVAGILRSFEYAAHQRLVDQAGDDDDRARQLAARAREWVTRNCASFCDGYAAEAGTDP…	0	8.202	4	2	8	2	441	48.8	4.7	760.93	2.68	2	2	other metabolic processes		Pf01636, Pf18085	66737786	MSMEG_6514; MSMEI_6342	mak	A0R6D9; I7FV18; msg:MSMEI_6342; msm:MSMEG_6514	0	0	High	High	Peak Found	Peak Found	1
High	Master Protein	A0QNZ7	Monoacylglycerol lipase OS=Mycolicibacterium smegmatis (strain ATCC 700084 / mc(2)155) OX=246196 GN=MSMEG_0220 PE=1 SV=1	MVSSTRSEHSFAGVGGVRIVYDVWTPDTDPRGVVVLAHGYAEHAGRYHHVAQRFGAAGLLVYALDHRGHGRSGGKRVHLRDLSEFVEDFRTLVGIAANDHPTLPRIVLGHSMGGGIVFAYGARYPGEYSAMVLSGPAVNAHDGVSPVLVAVAKVLGKLAPGIPVENLDADAVSRDPEVVAAYKADPMVHHGKLPAGIARALIGLGQSMPQRAAALTAPLLVVHGDKDRLIPVAGSRLLVDRVASEDVHLKVYPGLYHEVFNEPEQKLVLDDVTSWIVSHL	0	7.916	7	2	8	2	280	29.9	7.15	604.79	0	2	2	other metabolic processes	non-structural extracellular;plasma membrane;other membranes	Pf12146	66738408	MSMEG_0220; MSMEI_0213		A0QNZ7; msg:MSMEI_0213; msm:MSMEG_0220	0	0	High	High	High	Not Found	1
High	Master Protein	A0QZ33	Nitrilase/cyanide hydratase and apolipoprotein N-acyltransferase OS=Mycolicibacterium smegmatis (strain ATCC 700084 / mc(2)155) OX=246196 GN=MSMEG_3880 PE=4 SV=1	MAASRGKATTRLTTDALAFLTERHLAMLTTLRSDGSPHVVAVGFTFDPKTHIARVITTGGSQKAVNAQERGVAVLSQVDGARWLSLEGKSTVSSDPDAVRDAELRYAQRYRTPRVNPRRVVIEVRIERVLGSSELLDRS	0	7.846	17	2	8	2	139	15.2	10.48	738.81	5.87	2	2			Pf01243	66735247	MSMEG_3880		A0QZ33; msm:MSMEG_3880	0	0	High	High	Peak Found	Peak Found	1
High	Master Protein	A0R4P1	Oxidoreductase, short chain dehydrogenase/reductase family protein OS=Mycolicibacterium smegmatis (strain ATCC 700084 / mc(2)155) OX=246196 GN=MSMEG_5903 PE=1 SV=1	MTNDSHPSDTGPDRGADLDLSGKVAVVTGAAAGLGRAEAIGLAKAGATVVVNDIAGALEGSDVLDEIAAAGSKGVAVAGDISQRSTADELVETAEGLGGLDIVVNNAGITRDRILFNMSDEEWDAVIAVHLRGHFLLTRNAAAYWRSKAKAGDGTVYGRVINTSSEAGLSGPVGQPNYGAAKAGITALTLSAARALERFGVRANAIAPRARTAMTAGVFGDAPELAEGQMDPLSTDHVVTLVQFLAAPASEGVNGQLFIVYGPSVTLVAAPTAEKQFVADEDAWEPADLSVTLRDYFADRDPERGFSATALMESRD	0	7.846	8	2	8	2	316	32.5	4.72	577.81	2.28	2	2			Pf00106	66737191	MSMEG_5903		A0R4P1; msm:MSMEG_5903	0	0	High	High	Not Found	High	1
High	Master Protein	A0QS40	UPF0336 protein MSMEG_1340 OS=Mycolicibacterium smegmatis (strain ATCC 700084 / mc(2)155) OX=246196 GN=MSMEG_1340 PE=1 SV=1	MALSSKIVGMHYRYPDFYEVGREKIREHALAIKNDETYFYDEDAAAELGHDALPAPLTFICIFGYQAQSAFFDHADIGVREAKIVQVDQELKFFKPIKAGDRLYCDVYVHAVRRAHGTDIIVTKNIITNDAGEIVQEAYTTLAGRAGDGEEGFSDGSA	0	6.904	11	2	8	2	158	17.6	5.11	727.94	2.08	2	2			Pf13452	66732800	MSMEG_1340		A0QS40; msm:MSMEG_1340	0	0	High	High	High	Peak Found	1
High	Master Protein	A0QQH7	Adenylosuccinate synthetase OS=Mycolicibacterium smegmatis (strain ATCC 700084 / mc(2)155) OX=246196 GN=purA PE=1 SV=1	MPAIVLIGAQWGDEGKGKATDLLGGRVQWVVRYQGGNNAGHTVVLPTGENFALHLIPSGILTPGVTNVIGNGVVVDPGVLLTELKGLEDRGVDTSNLLISADAHLLMPYHVAIDKVVERWAGSKKIGTTGRGIGPCYQDKIARIGIRVADVLDEQVLAEKIEAALEFKNQVLVKIYNRKALEPAEVLENLLEQAEGFKHRIADARLLLNQALENDEAVLLEGSQGTLLDVDHGTYPFVTSSNPTAGGAAVGSGIGPTRITTVLGILKAYTTRVGSGPFPTELFDEHGAYLAKTGGEVGVTTGRARRCGWFDAVIARYATRVNGITDYFLTKLDVLSSLETVPVCVGYTVDGKRVDEMPMTQSDIARAEPVYEELPGWWEDISGAREFEDLPAKARDYVL…	0	6.736	6	2	8	2	431	46.3	5.29	636.55	0	2	2	other metabolic processes	other cell component	Pf00709	66738934	MSMEG_0759; MSMEI_0743	purA	A0QQH7; I7FE94; msg:MSMEI_0743; msm:MSMEG_0759	0	0	High	High	High	High	1
High	Master Protein	A0QSK8	Bac_luciferase domain-containing protein OS=Mycolicibacterium smegmatis (strain ATCC 700084 / mc(2)155) OX=246196 GN=MSMEG_1514 PE=4 SV=1	MTGIPREGGGVEADMTDTTPAAGPKPDLGRYGSFGRGVTPAQAKEIEALGYGAVWVGGSPPAELEWVEPILEATTTLQVATGIVNIWTAAPGPVAESFHRIEAACPGRFLLGIGVGHREAHVEYRKPLDALTDYLDKLDSYGVPKHRRVVAALGPKVLQLSAEHSAGAHPYLTTPEHTRSAREIIGPDAFLAPEHKVVLTTDAEQARAVGRKALDLYLGLANYLNNFKRLGFTDDELAKPGADRFIDAVVAYGTVDAIAARLSEHLAAGADHVPVQVLTSPDKLVPALAELAGPLGLA	0	6.298	6	2	8	2	298	31.4	5.76	622.04	4.07	2	2			Pf00296		MSMEG_1514		A0QSK8; msm:MSMEG_1514	0	0	High	High	Peak Found	High	1
High	Master Protein	A0R6M2	6,7-dimethyl-8-ribityllumazine synthase OS=Mycolicibacterium smegmatis (strain ATCC 700084 / mc(2)155) OX=246196 GN=ribH PE=3 SV=1	MSDVATQIAFVQATWHRNIVDQARAGFTDRINGLGFSSDTLEFFEVPGAFEIPLTAKRLAKTGRYRAIVAAGLVVDGGIYRHEFVATAVIDGLMRVQLDTDVPVFSVVLTPHHFHEHDEHVRYFAEHFVKKGAEAANAVAATLELHASLG	0	3.916	10	2	8	2	150	16.4	6.43	441.5	0	2	2	other metabolic processes	other cell component	Pf00885	66737864	MSMEG_6598	ribH	A0R6M2; msm:MSMEG_6598	0	0	High	High	Not Found	Peak Found	1
High	Master Protein	A0R436	DUF3027 domain-containing protein OS=Mycolicibacterium smegmatis (strain ATCC 700084 / mc(2)155) OX=246196 GN=MSMEG_5691 PE=4 SV=1	MTEPADRAEGSDLGSAAAADAPGLESVLRGAVDVARAALTEFSGADTVGEYLGVTLEDPSSATHRFLANMPGYRGWQWAVVVAAYPGADRATISELVLVPGPTALLAPKWVPWQERIRPGDLGPGDLLAPPPDDPRLVPGYSATGDPLIDETALELGFGRRQVLSEWGRAAAAQRWHDGEFGPNSPMARSTKRVCRDCGFYLPLGGALGRMFGVCANELSADGHVVDSEYGCGAHSDTPAPPGTGSPLYEPFDDGVLDLAD	0	10.083	15	3	7	3	261	27.3	4.61	440.47	1.83	2	3			Pf11228		MSMEG_5691		A0R436; msm:MSMEG_5691	0	0	High	High	Peak Found	Peak Found	1
High	Master Protein	A0R5X8	Putative phenylalanine aminotransferase OS=Mycolicibacterium smegmatis (strain ATCC 700084 / mc(2)155) OX=246196 GN=pat PE=1 SV=1	MSIRLRAEMADLPAYAPGKTVPGAIKIASNETVHGPLPSVREAILKATDLINRYPDNGYLDLRERLAKHVNFAPENISVGCGSVSLCQQLIQITSSVGDEVLFAWRSFEIYPLQVRTAGATPVAVALRDHTHDLDAMLAAITDRTRLIFVCNPNNPTSTVVDPGELARFVAAVPPHILVVLDEAYVEYIRDGLLPDSLGLVREHRNVVVLRTFSKAYGLAGLRVGYAVADPEIVTALGKVYVPFSATSVSQAAAIACLDAADELLARTDAVVAERTRVSDALRAAGYTLPPSQANFVWLPLAERTLDFVARAADNRIIVRPYGEDGVRVTIGAPHENDAFLDFAQRWIAPGGAGPRTGDSA	0	5.878	7	3	7	3	361	38.8	5.87	475.07	0	3	2	other metabolic processes		Pf00155	66737631	MSMEG_6351; MSMEI_6185	pat	A0R5X8; I7GAM4; msg:MSMEI_6185; msm:MSMEG_6351	0	0	High	High	Not Found	High	1
High	Master Protein	A0QT17	Peptidase M20 domain-containing protein 2 OS=Mycolicibacterium smegmatis (strain ATCC 700084 / mc(2)155) OX=246196 GN=MSMEG_1679 PE=3 SV=1	MSTSDTAVAETVTRHHPHLVALSRDLYDHPEIAWEEVRSARRVASTLAEGGFDVTERYCELDTAFAAQIGSGDLHVALCAEYDALPGLGHACGHNLISAITAGTALALAPMVDDLGLTLSVIGTPAEEGGGGKIELLERGGFDGQHFAAMVHPGPVDVARAQPFAVSHSHIEYRGKSAHAAAYPERGVNAADAFTIAQVAIGLLRQQLPVSVRVHGMMTRGGEAPNAIAEHTEGRWYVRAETLGQLAEIERKVMRCFEAGALASGAELIVTPESKPYAEFRTDDDLLACYERRATAVGRQFVSGPDTAMARASTDMGNVSQVLPAIHPYIGIDSLPAVNHQPEFAAATVTSAAETAIAHGAIALAGTVIDAASDPHLRQRLLDKR	0	9.885	6	2	7	2	385	40.7	5.68	964.37	1.81	2	1			Pf01546	66733127	MSMEG_1679		A0QT17; msm:MSMEG_1679	0	0	High	High	High	Peak Found	1
High	Master Protein	A0QXN2	Regulatory protein, TetR OS=Mycolicibacterium smegmatis (strain ATCC 700084 / mc(2)155) OX=246196 GN=MSMEG_3363 PE=4 SV=1	MAGSQKPALPHKEALLRSGTKLFYDNGFHGTTVDAVLADAGVPKGSFYHHFGSKDVFGQAVLDRYMEFQRSLLDKWSSKKNLSTPDRLAGYAKDMAHMFVKSGYQRGCLAGKFSTEVAASSEVFREQLSFHIEAWTTQVAALLASGQEQGDVRSDRSAQEIAEAVLSLIQGTFVLALSTRDKHTLATLVTTLRLLVEPPE	0	8.777	17	2	7	2	200	21.9	7.64	444.84	2.35	1	2			Pf00440, Pf16925	66734759	MSMEG_3363		A0QXN2; msm:MSMEG_3363	0	0	Not Found	High	High	High	1
High	Master Protein	A0R0W2	Adenosine 5'-phosphosulfate reductase OS=Mycolicibacterium smegmatis (strain ATCC 700084 / mc(2)155) OX=246196 GN=cysH PE=1 SV=1	MTDVTTSTENELRELAERGAAELADASAEELLRWTDEHFGGNYVVASNMQDAVLVEMAAKVRPGVDVLFLDTGYHFAETIGTRDAVEAVYDVHVVNVTPERTVAEQDELLGKNLFARDPGECCRLRKVVPLTNALKGYSAWVTGIRRVEAPTRANAPLISWDNAFGLVKINPIAAWTDEDMQNYIDANGILVNPLVYEGYPSIGCAPCTSKPIPGADPRSGRWAGLSKTECGLHVS	0	5.201	10	2	7	2	236	25.7	4.84	659.12	1.92	2	1	other metabolic processes	other cell component	Pf01507	66735855	MSMEG_4528; MSMEI_4415	cysH	A0R0W2; I7GDN9; msg:MSMEI_4415; msm:MSMEG_4528	0	0	High	High	Peak Found	High	1
High	Master Protein	A0R066	Branched-chain-amino-acid aminotransferase OS=Mycolicibacterium smegmatis (strain ATCC 700084 / mc(2)155) OX=246196 GN=ilvE PE=1 SV=1	MNSGPLEFTVSANTNPATDAVRESILANPGFGKYYTDHMVSIDYTVDEGWHNAQVIPYGPIQLDPSAIVLHYGQEIFEGLKAYRWADGSIVSFRPEANAARLQSSARRLAIPELPEEVFIESLRQLIAVDEKWVPPAGGEESLYLRPFVIATEPGLGVRPSNEYRYLLIASPAGAYFKGGIKPVSVWLSHEYVRASPGGTGAAKFGGNYAASLLAQAQAAEMGCDQVVWLDAIERRYVEEMGGMNLFFVFGSGGSARLVTPELSGSLLPGITRDSLLQLATDAGFAVEERKIDVDEWQKKAGAGEITEVFACGTAAVITPVSHVKHHDGEFTIADGQPGEITMALRDTLTGIQRGTFADTHGWMARLN	0	3.677	5	2	7	2	368	39.8	5.05	455.07	1.62	2	2	protein metabolism;other metabolic processes		Pf01063	66735622	MSMEG_4276; MSMEI_4176	ilvE	A0R066; I7FPI5; msg:MSMEI_4176; msm:MSMEG_4276	0	0	High	High	Not Found	High	1
High	Master Protein	A0QT08	Succinate dehydrogenase flavoprotein subunit OS=Mycolicibacterium smegmatis (strain ATCC 700084 / mc(2)155) OX=246196 GN=sdhA PE=1 SV=1	MIQEHRYDVVIVGAGGAGMRAAVEAGPRARTAVLTKLYPTRSHTGAAQGGMCAALANVEEDNWEWHTFDTVKGGDYLADQDAVEIMCKEAIDAVLDLEKMGMPFNRTPEGRIDQRRFGGHTRDHGKAPVRRACYAADRTGHMILQTLYQNCVKHDVEFFNEFYALDIALTETPAGPVATGVIAYELATGDIHVFHAKAIVFATGGSGRMYKTTSNAHTLTGDGLGIVFRKGLPLEDMEFHQFHPTGLAGLGILISEAVRGEGGRLLNGEGERFMERYAPTIVDLAPRDIVARSMVLEVLEGRGAGPNKDYVYIDVRHLGEDVLEAKLPDITEFARTYLGVDPVKELVPVYPTCHYVMGGIPTTVNGQVLRDNTNVIPGLYAAGECACVSVHGANRLGTN…	0	7.656	6	3	6	3	584	64.4	5.92	410.12	0	3	3	other metabolic processes	other membranes	Pf00890, Pf02910	66733119	MSMEG_1670	sdhA	A0QT08; msm:MSMEG_1670	0	0	High	High	Peak Found	Peak Found	1
High	Master Protein	A0QPW2	Transcriptional regulator, Crp/Fnr family protein OS=Mycolicibacterium smegmatis (strain ATCC 700084 / mc(2)155) OX=246196 GN=MSMEG_0539 PE=4 SV=1	MDEVLARAGIFQGVQPSAVAALAQQLEPVSFSRGQVVFTEGEPGETLYIITSGKVKIGRKSVDGRESLLTLMGPSDMFGELAIFDPGPRTSTVTALSDVQAVMMHRKVLRNWIADRPEIAEQLLRVLARRLRRTNDNLSDLIFTDVPGRVAKQLLHLAQRFGTREGNSLRVDHELTQEEIAQLVGSSRETVNKALSDFAQRGWIRVQGKSILIDNTERLARRAN	0	7.616	14	3	6	3	224	24.8	9.51	431.78	2.25	3	3	other biological processes		Pf00027, Pf13545	66738718	MSMEG_0539		A0QPW2; msm:MSMEG_0539	0	0	High	High	Not Found	High	1
High	Master Protein	Q3I5Q7	HBHA-like protein OS=Mycolicibacterium smegmatis (strain ATCC 700084 / mc(2)155) OX=246196 GN=MSMEG_0919 PE=4 SV=1	MADKTQPTVEELKAPLLAAVGAADLALATVNEIIATLLERAGEARSDAEARVEESRARLTKLQEELPSQFGELREKLNSDELRKKLNSEELRKAAESYADQATATYNKLVERGEAALERLRNQPALEEAATRVETYTDQAVELTQEALGTVASQTRAVGERAAKLVGVELPKRAEAAAETASEAAAETAEPVKKAAAPAAKKAAPAKKAAPAKKATPAKSAAKAPAKKVTQK	0	7.586	12	3	6	3	232	24.5	8.19	496.25	0	3	3				66739087	MSMEG_0919		A0QQY4; msm:MSMEG_0919; Q3I5Q7	0	0	High	Peak Found	Peak Found	Peak Found	1
High	Master Protein	A0QZ93	AAA family ATPase OS=Mycolicibacterium smegmatis (strain ATCC 700084 / mc(2)155) OX=246196 GN=MSMEG_3942 PE=4 SV=1	MEDKPETAVAQRDRVFAFGNLDAQIRETHTGLVALIGDLAYKAKKPVRTDFLDFTTAQQREAACLREVELNSRLAPNSYLGVAHLVGPGDRPDEPVVVMRRYRDADRLSTLVTRGAEVNDQLDVIAEILARFHRDAGRGAVIDDQARATSVWARWDENLTELARMSLVPPEQLSEVRRLASQYLSGRAELFAERIADGRIVDGHADLLADDIFCTPEGPAILDCLEFDDTLRYVDGVDDAAFLAMDLEFLGSPELSAFFVDRYRHHAHDTAPQSLMDFYVAYRAVVRAKVECIRVGQGRPEAATDACRHIDIALDRLRAATVQLVIVGGGPGTGKTTVSRALAEELGAVVISTDDVRRYLQESGVIGGAAGELDTGLYAPKNVAAVYDEVLARARHALT…	0	7.556	5	3	6	3	498	54.2	5.34	414.25	0	3	3			Pf13671	66735307	MSMEG_3942		A0QZ93; msm:MSMEG_3942	0	0	Peak Found	High	Not Found	Peak Found	1
High	Master Protein	A0R6D7	Acyl-CoA dehydrogenase domain protein OS=Mycolicibacterium smegmatis (strain ATCC 700084 / mc(2)155) OX=246196 GN=MSMEG_6512 PE=3 SV=1	MDFQLTEEQTLLADTTRDLLSSYDTETRNKVIASDPGHKPEVWNQLAEIGILGLGFDEDSGGQLEIMVVLNEIGRRLAPEPVLHGALAPGAIIAERGTDAQRALLDEVASGQRILAFAHLEPGVRDAAATPTVTATRDGDAWTLNGTKNPVLAGDAANTLVVSAALPDGGAGLFLVDAGASGVSRKPFRTFDGARGAQIELSAAPAEPLGDATDASETISRALVRISAGLAAEALGAMEEALRLTTDYLKSRKQFGVTLSKFQTLTQRAADMYVSLELARSMAFYASMSIADGEFDPVKAARAKLQIGRSGRHIAQESIQLHGGIGITAEYPVGHYAARLTAIEHTLGSAQDQLRTLAGQLDSYEIVSL	0	10.214	8	2	6	2	369	38.9	5.02	472.07	0	2	2			Pf00441, Pf02770, Pf02771	66737784	MSMEG_6512		A0R6D7; msm:MSMEG_6512	0	0	High	High	Not Found	Peak Found	1
High	Master Protein	A0R071	Oxidoreductase OS=Mycolicibacterium smegmatis (strain ATCC 700084 / mc(2)155) OX=246196 GN=MSMEG_4282 PE=4 SV=1	MGWFDRFRRGGSVRAGDPAADLQYMQRWVAEHTGVEAYVEPRTTVTDVTVVLVAADGEWTRRRAGGERGARRLADRLKIPVYDVQKTGYPQRMRDHDARRRIERKRAMRRELEES	0	8.218	18	2	6	2	115	13.4	10.51	691.11	3.06	2	2				66735627	MSMEG_4282		A0R071; msm:MSMEG_4282	0	0	High	High	High	Peak Found	1
High	Master Protein	A0R048	Anthranilate phosphoribosyltransferase OS=Mycolicibacterium smegmatis (strain ATCC 700084 / mc(2)155) OX=246196 GN=trpD PE=1 SV=1	MTSGPSQPFPSASGPDDGPSWPRILGRLTTGQNLPNGHAAWAMDQIMTGAATPAQISGFAVSMKMKRPTASEVRELADIMLTHARRVPTDEIGTDTVDIVGTGGDGANTVNLSTMASIVVAACGVPVVKHGNRAASSLSGGADTLEALGVRIDLGPDDVARSVREVGIGFAFAPQFHPSYKHASIVRREIGVPTVFNLLGPLTNPAGPRAGLIGCAWADLAEVMAGVFAARGSSVLVVHGDDGLDELTTTTTSTIWRVQGGTMERLTFDPAAFGFKRAEISELVGGDASENAAEARAVLGGAKGPVRDAVVLNAAGAMVAHAGLASDAQWLPAWEAGLARAVEAIDSGAAEQLLARWVRFGQQL	0	7.553	8	2	6	2	364	37.5	5.52	524.12	2.03	2	2	other metabolic processes		Pf00591, Pf02885	66735605	MSMEG_4258; MSMEI_4159	trpD	A0R048; I7GBQ0; msg:MSMEI_4159; msm:MSMEG_4258	0	0	Not Found	High	High	High	1
High	Master Protein	A0R753	Integral membrane protein OS=Mycolicibacterium smegmatis (strain ATCC 700084 / mc(2)155) OX=246196 GN=MSMEG_6783 PE=4 SV=1	MTRTAPVRIVRDSLLLGPVRVTFQRTLRIPETGLHPLPPGLGRFPLRRVEDYPDTAPAEWLARGGIMLPIYQREAMWLSFDSDQPTALQVGVGKVCAVSGLPWIERLIGDPQNYVALPRQPWLDGINAGEGFIRQFVAVPLGSGATVEGQVTGEETHGGVQLRAVGLTAEALEKWRAEQAAAEESTDVEDCYDGPLMCAPPAADGAMGLGAGGRMRQEVYADSRPLTDYDETGALRVFVHLCSAAQWTAITGEVPPPTPVDRDAYVEAGLPWFDYYDADARDLAASEVLSRVKSVGEKLDIDDDPFVPVKPGTVIPIGGASADTVSDGTW	0	7.36	6	2	6	2	330	35.5	4.69	538.42	3.87	2	2				66738040	MSMEG_6783		A0R753; msm:MSMEG_6783	0	0	High	High	Peak Found	Peak Found	1
High	Master Protein	A0QRA8	Methyltransferase, UbiE/COQ5 family protein OS=Mycolicibacterium smegmatis (strain ATCC 700084 / mc(2)155) OX=246196 GN=MSMEG_1049 PE=4 SV=1	MTEIRDAADPAPNPHATAEEVEAAMHDSKLAQVLYHDWEAETYDEKWSISYDQRCIDYARGRFDAIVPEDEQRKLPYDRALELGCGTGFFLLNLIQSGVARRGSVTDLSPGMVKVATRNGQSLGLDIDGRVADAEGIPYEDDTFDLVVGHAVLHHIPDVELSLREVVRILKPGGRFVFAGEPTTVGNRYARELSTLTWHATTNLTKLPFLSGWRRPQEELDESSRAAALEAVVDLHTFDPADLERMATNAGAVEVRTASEEFTAAMLGWPVRTFEAAVPPGRLGWGWAKFAFNSWTTLSWVDANVWRKVVPKGWFYNVMVTGVKPS	0	6.399	7	2	6	2	326	36.3	5.15	433.19	0	2	2	other metabolic processes		Pf08241	66733743	MSMEG_1049; MSMEG_2329		A0QRA8; msm:MSMEG_1049; msm:MSMEG_2329	0	0	Peak Found	High	Peak Found	High	1
High	Master Protein	Q9X5M0	Arginine--tRNA ligase OS=Mycolicibacterium smegmatis (strain ATCC 700084 / mc(2)155) OX=246196 GN=argS PE=3 SV=2	MTPADLAELLKATAAAVLTEHDLDVAALPATVTVERPRNPEHGDYATNLALQLGKKVGVNPRELAGWLATALTAADGIAVAEVAGPGFVNLRIEASAQGVIITNVLAAEGSYGSSDQYAGRNVNLEFVSANPTGPIHIGGTRWAAVGDALGRLLATQGAAVTREYYFNDHGAQIDRFVNSLIASAKGEPTPEDGYAGDYIVDIAQQVIAKAPDVLGLPEDQQRETFRAIGVDLMFTHIKQSLHDFGTDFDVYTHEDSMHTSGRVDQAITQLREAGSIYEKDGAVWLRTTDFGDDKDRVVIKSDGNAAYIAGDLAYYLDKRKRGFDLCIYMLGADHHGYIARLKAAAAALGDDPDTVEVLIGQMVNLVRDGQPVRMSKRAGTVITLDDLVEAIGVDAARY…	0	5.825	4	2	6	2	550	59.4	5.19	452.52	0	2	2	protein metabolism;RNA metabolism OR transcription;other metabolic processes	other cell component	Pf00750, Pf03485, Pf05746	66736280	MSMEG_4959; MSMEI_4832	argS	A0R223; I7G6F4; msg:MSMEI_4832; msm:MSMEG_4959; Q9X5M0	0	0	High	High	Peak Found	Peak Found	1
High	Master Protein	A0QUW2	cysteine desulfurase OS=Mycolicibacterium smegmatis (strain ATCC 700084 / mc(2)155) OX=246196 GN=MSMEG_2357 PE=3 SV=1	MTSTAGRQVYLDHAATTPMHPAAIEAMTAVLAGVGNASSLHGSGRAARRRMEEAREALARLLGARPSEIIFTTGGTESDNLAVKGIYWARHDADPARRRIITTAVEHHAVLDAVEWLVAHEGAEVTWLPVDRDGAVSPAALREALQAGAHDVALVSVMWANNEVGTIMPIAELAAVAAEFGVPMHSDAVQAVGQIPVNFGASGLAAMSVTAHKFGGPTGVGALLLRRDTACVPLLHGGGQERDVRSGTPDVAGVVAMATAAGVAIENLADNSARVRALRDRLIDGVLSAIEDAQLNGARGDARLPGNAHFTFHGCEGDSLLMLLDAKGVECSTGSACTAGVAQASHVLIAMGADAVKARGSLRLSLGHTSTEADVDTALEVLPAAVERARQAALASAGT…	0	5.343	5	2	6	2	402	41.3	6.16	508.37	1.63	2	2			Pf00266	66733771	MSMEG_2357		A0QUW2; msm:MSMEG_2357	0	0	High	High	Peak Found	Peak Found	1
High	Master Protein	A0QNG7	FHA domain protein OS=Mycolicibacterium smegmatis (strain ATCC 700084 / mc(2)155) OX=246196 GN=MSMEG_0035 PE=4 SV=1	MKAGDVMGLVDRIERKLESTVGDAFARVFGGSIVPQEVEVALRREAETRARTVAGGQVLAPNDYVITLSGTDYQKVRADTDLTSTTFAKHLKGYIHDQGWQTYGEVVVRFEQSPNLHTGQFRARGAVNPDSTAGESARAPRDHAFTAESGEPPMTDNPNYRGGQGPARPGDEYYDERYGRQDDPRGGQYPPEQGGYPPQDQGGYPPRGGGYPDQGGYPDQGGYPDQGGYPDQGGYPPQSYEQRPPAGYGPPPQGGGYDRGYGQPAGGYPPAGPPAGPPPGGQPGYGGADYDYGRQAPRHDDYGRPDPRQGYPEQGGYPEQGGYGGQAYGRPDYGQPDYGQQPGRGYPEQGGYPEQGGYGEPAGRDYEYGGDYGAPAGQGGYGGGYGADYPAGGTTVTLQ…	0	5.252	3	2	6	2	487	52	4.94	460.85	0	2	2			Pf00498, Pf12401		MSMEG_0035		A0QNG7; msm:MSMEG_0035	0	0	High	High	Peak Found	Peak Found	1
High	Master Protein	A0QX83	Imidazoleglycerol-phosphate dehydratase OS=Mycolicibacterium smegmatis (strain ATCC 700084 / mc(2)155) OX=246196 GN=hisB PE=1 SV=1	MSALANRRARVERKTKESEIVVDLDLDGTGVVDIDTGVPFFDHMLTSLGSHASFDLTVHAKGDIEIEGHHTVEDTAIVLGQALGQALGDKKGIRRFGDAFIPMDESLAHAAVDVSGRPYFVHTGEPESMVSFTIAGTGAPYHTVINRHVFESLAFNARIALHVRTLYGRDPHHITEAQYKAVARALRQAVEYDARVTGVPSTKGTL	0	4.558	9	2	6	2	206	22.4	6.52	373.41	0	2	2	other metabolic processes	other cell component	Pf00475	66734607	MSMEG_3207; MSMEI_3125	hisB	A0QX83; I7GAQ5; msg:MSMEI_3125; msm:MSMEG_3207	0	0	High	Peak Found	High	Peak Found	1
High	Master Protein	A0QVL6	Hydrogenobyrinate a,c-diamide synthase OS=Mycolicibacterium smegmatis (strain ATCC 700084 / mc(2)155) OX=246196 GN=cobB PE=3 SV=1	MVGTTPAVVIAAPASGSGKTTVSTGLIGALRAAGHTVAPFKVGPDFIDPGYHAVAAGRPGRNLDPVLVGEDLIGPLYAHGSAGADIAVVEGVMGLFDGRICDQMTGTPQGSAAQVASLLGAPVILVVDARGQSQSIAALLHGFTTFDSAVHVAGVILNRVGSPRHEAVLRQACEHAGVAVLGAIPRADELSVPSRHLGLITAVEHGRQARDAVAAMTELVGRHVDLAAVMACASARVSAQPWSPCVETSFPVADVAGVTVALASGKAFSFGYAEHAELLRGTGATVAEFDPLVDPLPDGADALVLPGGFPEQFTAELSANDLVRQQISELARRGAPIHAECAGLTYLVDDLDGAPMCGVLRGSAKFTERLTLGYRDAVAVVDSSMHAAGERVVGHEFHR…	0	4.554	5	2	6	2	458	46.9	6.14	465.33	0	2	2	other metabolic processes		Pf01656, Pf07685	66734027	MSMEG_2617	cobB	A0QVL6; msm:MSMEG_2617	0	0	High	High	High	Peak Found	1
High	Master Protein	A0R170	Alpha oxoglutarate ferredoxin oxidoreductase, beta subunit OS=Mycolicibacterium smegmatis (strain ATCC 700084 / mc(2)155) OX=246196 GN=orB PE=4 SV=1	MSLVPTADQPQKAKDFTSDQEVRWCPGCGDYVILNTIRNFLPELGLRRENIAFVSGIGCSSRFPYYLETYGFHSIHGRAPTIATGLALARPDLSVWVVTGDGDSLSIGGNHLIHALRRNINITILLFNNRIYGLTKGQYSPTSEVGKITKSTPMGSLDYPFNPVSLALGAEATFVGRALDSDRKGLSEVLRGAAEHRGAALVEIMQDCPIFNDGSFDALRKEGAEERLINLTHGEPITFGADGEYAVVKSGYGLEIAKTAEVSADDIVVHDAQIDDPAYAFALSRLSEQNLDHMVMGIFRKVSRPTYDDAARQQVATAIESRPHDTAALQSLLRGKDTWTVD	0	4.517	6	2	6	2	342	37.3	5.67	316.01	0	2	2			Pf02775		MSMEG_4645	orB	A0R170; msm:MSMEG_4645	0	0	High	High	Not Found	Peak Found	1
High	Master Protein	A0QYD4	Short chain dehydrogenase OS=Mycolicibacterium smegmatis (strain ATCC 700084 / mc(2)155) OX=246196 GN=MSMEG_3619 PE=4 SV=1	MAEVLVTGGDTELGRAIAQGFRDAGHNVVIAGARRDDLEVAAKELDIESIVFDNTDAASLEAVRGQFPHHLDTLVNVPAPRWEAKDPRTYTLADLASAWRNNLDATVVSAALTVQIVGDHLRSGGSIVNVLPESAKEGSVEAAIKAALSDWTAGQADFFGTRGITINAVAAGRSAEQAYDGLTRTPPSVADEFTRLALFLSTPAARHITGQTLHVSRGALATV	0	4.314	10	2	6	2	223	23.5	5.27	399.54	0	2	2			Pf13561	66735003	MSMEG_3619		A0QYD4; msm:MSMEG_3619	0	0	High	High	Not Found	Peak Found	1
High	Master Protein	A0R2U7	Fructose-1,6-bisphosphatase OS=Mycolicibacterium smegmatis (strain ATCC 700084 / mc(2)155) OX=246196 GN=glpX PE=3 SV=1	MTPSRGEAPDRNLALELVRVTEAGAMAAGRWVGRGDKEGGDGAAVDAMRELVNSVSMRGVVVIGEGEKDNAPMLYNGEEVGNGDGPECDFAVDPIDGTTLMSKGMPNAISVLAVAERGAMFDPSAVFYMNKIAAGPDVADFIDITSPIAANIQRIAKMRKASVSDITVCILDRPRHAKLIADVRAAGARIRLISDGDVAGAISACRPDSGTDLLAGIGGTPEGIITAAAIRCMGGEIQATLAPTDDEERQKAIDRGHDLDRVLTTKDLVSGENVFFCATGVTDGDLLKGVRFFGGGCTTQSIVMRSKSGTVRMIEAYHRLSKLNEYSAINFTGDSSAAYPLP	0	4.292	6	2	6	2	342	35.8	5.08	368.96	0	2	2	other metabolic processes	other cell component	Pf03320	66736553	MSMEG_5239	glpX	A0R2U7; msm:MSMEG_5239	0	0	High	High	Peak Found	High	1
High	Master Protein	A0R6D6	Acyl-CoA dehydrogenase domain protein OS=Mycolicibacterium smegmatis (strain ATCC 700084 / mc(2)155) OX=246196 GN=MSMEG_6511 PE=3 SV=1	MQLALTPEEAAFRDELRTFYRTEIPEDIRARHAKGGELLKDDIVTTHKILHKHGLAVPNWPVEWGGKDWTPTQHQIWLDEMQLACVPEPLTFNAKMIGPVIAEFASQEMKERFLPATAALDIFWCQGFSEPEAGSDLASLRTTAVRDGDTYVVNGQKTWTTLGQYADWIFCLVRTDPQAPKRQAGISMLLIDLDTPGITMRPIKLVDGSVEVNEVFFEDVRVPADQLVGEENQGWTYAKFLLGNERTGITGVARTKVRLAQAKERAAANGLLNDPLFAARLAEAENDVLALELTQMRVTSDSSDGKPNPASSVLKLRGTQLQQLATELLVEVAGADALPCEAEGIASPEWAQLTAPQYLNYRKTSIYGGSNEVQRTIISSTILGL	0	3.995	6	2	6	2	385	42.5	5.02	347.98	0	2	2			Pf00441, Pf02770, Pf02771	66737783	MSMEG_6511		A0R6D6; msm:MSMEG_6511	0	0	Peak Found	High	High	Peak Found	1
High	Master Protein	A0QWQ3	YjbQ family protein OS=Mycolicibacterium smegmatis (strain ATCC 700084 / mc(2)155) OX=246196 GN=MSMEG_3024 PE=3 SV=1	MIDVDTSRRRLVDLTDEVRGFCGSRRDGLCNVFVPHATAGLAIIETGAGSDDDLVDTLERLLPRDDRYRHAHGSFGHGADHVLPALVSPSVTIPVQDGCPLLGTWQSIVLVDLNRDNPRRSVRLSFLGA	0	5.752	8	2	5	2	129	14.1	6.07	562.85	0	2	1			Pf01894		MSMEG_3024		A0QWQ3; msm:MSMEG_3024	0	0	Peak Found	High	High	High	1
High	Master Protein	A0R177	D-oliose 4-ketoreductase OS=Mycolicibacterium smegmatis (strain ATCC 700084 / mc(2)155) OX=246196 GN=MSMEG_4652 PE=4 SV=1	MTGLRIGILGASRIAEKAIVGPAEDLGHRLVAVAARDRRRAEAFAEKYGVQRVLDSYRDVVEDPDVDMVYNPLANGLHAPWNLAAIAAGKPVLSEKPFARNESEAATVAQAARDAGVPVLEGFHYHFHPVTQRAFAVAAGGELGEITRVEVRMAMPSPADDDPRWSLDLAGGAVMDLGCYGIHVMRALGAMRVDGLGGEPKVLGARAEERTPGVDAWCEVDFVFPEGGTGVSTNSMVADDYSFTITITGSDGEAVVHDFIRPNLDDRLTVMTGSGVRVEHLGTRPSYTYQLEAFAAHVRDGAPLPFGVDDAVTNMAFVDKAYRAAGLAPR	0	5.392	6	2	5	2	330	35.2	5.27	365.54	0	1	2			Pf01408	66735970	MSMEG_4652		A0R177; msm:MSMEG_4652	0	0	High	High	Peak Found	Not Found	1
High	Master Protein	A0QXB8	TonB_C domain-containing protein OS=Mycolicibacterium smegmatis (strain ATCC 700084 / mc(2)155) OX=246196 GN=MSMEG_3244 PE=4 SV=1	MEITNPTLKVQCGPRPRSSGDPEERRDGRRDPRRDGEHALSAGNPVGVVPRAGGHAVVERQFGHADRARTVAEDHSRSLCPRCVPRSSISQHRRWRDVRPALRLRCASKPRRADHVAQWRLQVSVAGWRHRDPGGILSDERSWMRTTAISCAIACSAMVVGPGMAGTAVASADLFGVGGILDIFDHHKDQKKKKHSERGANVRGQQNGGSASQAGDRGSRRAPGFGPGPRHAGPDRSGRPGAHRAPDRPGPAGNRQGQPSSADDRDDQQTGTARRSAQSVDVPESAITGARITPPAVVAGGGGNGVSRVPTGGTTGRAPNLAPVPTAPSNRSIVIRAQPPVASAPSVPAAPVAPVPVAVPPVPPVPVVVAPPGAPAGGGGAPGPSPATPSVPALTPPAV…	0	4.59	5	2	5	2	474	48.6	11.4	311.06	0	2	2		other membranes			MSMEG_3244		A0QXB8; msm:MSMEG_3244	0	0	High	High	Not Found	Peak Found	1
High	Master Protein	A0QTT2	ABC1 family protein OS=Mycolicibacterium smegmatis (strain ATCC 700084 / mc(2)155) OX=246196 GN=MSMEG_1954 PE=1 SV=1	MSDIKRGSVARNAKLAGLAGGMAGRAALGFGKRLTGKSKDEVTAELMDKAAQQLFTVLGELKGGAMKVGQALSVMEAAIPEQYGKPYREALTKLQKDAPPLPAAKVHRVLDAQLGTKWRDRFSSFDDKPVASASIGQVHKGIWSDGREVAVKIQYPGADEALRADLKTIQRLVGVFKQLAPGADIQGVVDELTERTEMELDYRLEADNQRAFAKAYRNDPHFAVPAIIASAPKVVISEWMEGIPMSVIIREGTPEQRDLMGTRLTELTFGAPARLEMMHGDAHPGNFMLLPDGRMGVIDFGAVAPLPGGFPTSLGETIRLARDKNYDELLPTMERAGFLQKGQEVSIEEVEDMLRQYVDPIKVDVFHYNRKWLQKMAASQMDNSVAQIKMARSLDLPAN…	0	8.916	5	2	4	2	439	47.8	6.68	405.07	1.66	2	2			Pf03109		MSMEG_1954		A0QTT2; msm:MSMEG_1954	0	0	High	Not Found	Peak Found	Peak Found	1
High	Master Protein	A0QP17	XRE family transcriptional regulator OS=Mycolicibacterium smegmatis (strain ATCC 700084 / mc(2)155) OX=246196 GN=MSMEG_0240 PE=4 SV=1	MAPDVRDMRDARRKDMSPIQPPSNRSPGQRNQGPRPAAVRPRDPQAPARGAARGPQRQFDDRPVEYWPTAAIRAALETDDLTVWQRIVAAIKRDPYGRTARQVEEVLETARPYGVSKALSEVLVRTRDHLEASERAEVAKQIQAMLRRSKLAPPEFASRVGVSNEEFATYLEGSVSPRASLLLRMQRLSDRFAKIAAQRSGK	0	7.784	10	2	4	2	202	22.7	10.76	426.22	1.75	2	2					MSMEG_0240		A0QP17; msm:MSMEG_0240	0	0	High	Peak Found	Not Found	Peak Found	1
High	Master Protein	A0QYT3	Phenylalanine--tRNA ligase beta subunit OS=Mycolicibacterium smegmatis (strain ATCC 700084 / mc(2)155) OX=246196 GN=pheT PE=3 SV=1	MRIPYSWLREAVRAGAPDWDVTPEELEQTFIRIGHEVEEIITAGPVSGPLTVGRVIEIEELTEFKKPIRACKVDVGDQNVDGAPRDIVCGARNFAVGDLVVVALPGTTLPGDFTISSRKTYGRLSDGMICSAAELNFGTDHSGIIVLPPGTAEPGAPAADVLGLDDVVFHLAVTPDRGYCLSVRGLAREIACAFDLDYVDLADVEPLPVEGEAWPLTVQPGTGVQRFGLRPVTGIDPAAVSPWWMQRRLLLSGIRAISPAVDVTNYVMLEFGHPMHAHDSSLITGAFDVRFARDGEKVVTLDDVERTLNSGDVLIVDDVATAAIGGVMGAGTTEVRETTTDVLLEAAVWDPAAVSRTQRRLHLASEAGRRYERSVDPAISVAALDRCASLLAEIAGGTV…	0	7.438	3	2	4	2	832	88.6	4.93	385.49	1.86	2	2	protein metabolism;RNA metabolism OR transcription;other metabolic processes	other cell component	Pf01588, Pf03147, Pf03483, Pf03484, Pf17759	66735147	MSMEG_3777	pheT	A0QYT3; msm:MSMEG_3777	0	0	Peak Found	High	Not Found	Peak Found	1
High	Master Protein	A0R2L4	Base excision DNA repair protein, HhH-GPD family protein OS=Mycolicibacterium smegmatis (strain ATCC 700084 / mc(2)155) OX=246196 GN=MSMEG_5156 PE=4 SV=1	MPTLQLVQDPDADALLESNPFALLVGMLLDQQIPMETAFAGPKKLADRIGKVDAVHIAEYNPDKFAEKFSETPAVHRFPGSMAKRVQALAQAVVDDYDGDVTAIWTGGDPDGPEVLRRLKRLPGFGDQKARIFLALLGKQYGVTPEGWREAAGDYGKAGTYMSVADVVDAGSLQKVRAYKKDMKAAAKAAKNK	0	6.589	14	2	4	2	193	20.9	7.39	315.14	0	2	2	DNA metabolism;other metabolic processes;stress response		Pf00730	66736471	MSMEG_5156		A0R2L4; msm:MSMEG_5156	0	0	High	Peak Found	Peak Found	Peak Found	1
High	Master Protein	A0R5I9	Palmitoyl-CoA hydrolase OS=Mycolicibacterium smegmatis (strain ATCC 700084 / mc(2)155) OX=246196 GN=MSMEG_6208 PE=3 SV=1	MSAPSWIKGLLAFERDGDVFCIREPEPNTIERLFGGLIAAQSLGAAGATVDDDKVPQSLHAYFVRGGRYDTDVEFRVTRIRDGRAFATRQVSASQDGKVILEMIASFHAPEPGVDWQPRTEPRLEFDAAVPKDPEIDFSDAFEVRTRTSDDSEFAVPPFWIRTREPVEDDPLVRACALTYMSDLGPVPTALPPTVPLRPDLGFATSLDHSIWFHRPFRPDIWHRYELRAANHNDSRGLTTGSLIDESGTLIASVCQEALWRLDIS	0	5.789	6	2	4	2	265	29.6	5.02	270.99	1.61	2	2	other metabolic processes		Pf13622	66737491	MSMEG_6208		A0R5I9; msm:MSMEG_6208	0	0	Peak Found	High	High	Peak Found	1
High	Master Protein	A0QWU9	Riboflavin synthase, alpha subunit OS=Mycolicibacterium smegmatis (strain ATCC 700084 / mc(2)155) OX=246196 GN=ribE PE=4 SV=1	MFTGIVEELGVLVDKAELDDSARLTIRGPVVTADAGHGDSIAVNGVCLTVVDVLPDGAFTADVMGETLNRSSLAGVAVGDRVNLERAAAVNSRLGGHIVQGHVDGTGSVISRTPHEHWEVVRIALPPALSRYVVEKGSITVDGVSLTVSAIGDDWFEISLIPTTRELTTLGTAPVGTTVNLEVDVIAKYVERLMSGTGR	0	5.777	10	2	4	2	199	20.8	4.92	332.34	1.66	2	2			Pf00677	66734476	MSMEG_3071	ribE	A0QWU9; msm:MSMEG_3071	0	0	High	Peak Found	Peak Found	High	1
High	Master Protein	A0QQL0	Thiazole synthase OS=Mycolicibacterium smegmatis (strain ATCC 700084 / mc(2)155) OX=246196 GN=thiG PE=1 SV=1	MADSVLRIGGREFGSRLIMGTGGAPNLSVLEEALIASGTELTTVAMRRVDAETGTGVLDLLNRLGIAALPNTAGCRGAAEAVLTAQLAREALGTDMVKLEVIADERTLLPDAVELVKAAEQLVDDGFTVLPYTNDDPVLARRLEDIGCAAVMPLGSPIGTGLGISNPHNIEMIVAAAGVPVVLDAGIGTASDAALAMELGCDAVLLATAVTRASDPPTMAAAMASAVTAGHLARQAGRIPKRFWAQASSPAL	0	5.461	8	2	4	2	252	25.6	4.75	305.7	1.63	2	2	other metabolic processes	other cell component	Pf05690	66738968	MSMEG_0793; MSMEI_0777	thiG	A0QQL0; I7FX04; msg:MSMEI_0777; msm:MSMEG_0793	0	0	Peak Found	Peak Found	Peak Found	High	1
High	Master Protein	A0QR20	Delta-aminolevulinic acid dehydratase OS=Mycolicibacterium smegmatis (strain ATCC 700084 / mc(2)155) OX=246196 GN=hemB PE=3 SV=1	MAFPRHRPRRLRTTPAMRRLVAQTSLEPRHLILPMFVADGIDEPRPINSMPGVVQHTRDSLRRAAADAVAAGVGGLMLFGVPLDEDKDATGSVGVDPDGILNVALRDLAKDLGDSTVLMADTCLDEFTDHGHCGVLDAHGRVDNDATNLRYVELAVAQADSGAHVVGPSGMMDGQVAAIRDGLDAAGHTDVAILAYSAKFASAFYGPFREAVSSSLTGDRRTYQQDAGNIREAVREIELDIDEGADMVMVKPAMSYLDVVRAAAEISPVPVAAYQISGEYSMISAAAANGWIDLQTAALESLVGIRRAGADLILTYWAADVAGWLA	0	5.404	6	2	4	2	326	34.6	5	284.53	1.63	2	2	other metabolic processes		Pf00490	66739121	MSMEG_0956	hemB	A0QR20; msm:MSMEG_0956	0	0	High	High	Peak Found	Not Found	1
High	Master Protein	A0QVT2	Ribonuclease J OS=Mycolicibacterium smegmatis (strain ATCC 700084 / mc(2)155) OX=246196 GN=rnj PE=1 SV=1	MSAELAPPPPLAPGGLRVTALGGISEIGRNMTVFEHLGRLLIVDCGVLFPGHDEPGVDLILPDLRHIEDRLDEIEALVVTHAHEDHIGAIPFLLKLRPDIPVVGSKFTIALVREKCREHRLKPKFVEVAERQSSQHGVFECEYFAVNHSIPGCLAVAIHTGAGTVLHTGDIKLDQLPLDGRPTDLPGMSRLGDAGVDLFLCDSTNSEHPGVSPSESEVGPTLHRLIRGAEGRVIVACFASNVDRVQQIIDAAVALGRRVSFVGRSMVRNMGIARELGYLKVDDSDILDIAAAEMMPPDRVVLITTGTQGEPMAALSRMSRGEHRSITLTSGDLIILSSSLIPGNEEAVYGVIDSLSKIGARVVTNAQARVHVSGHAYAGELLFLYNGVRPRNVMPVHGT…	0	5.228	3	2	4	2	558	59.6	6.38	272.87	0	2	2	RNA metabolism OR transcription;other metabolic processes	other cell component	Pf07521, Pf12706, Pf17770	66734093	MSMEG_2685; MSMEI_2620	rnj	A0QVT2; msg:MSMEI_2620; msm:MSMEG_2685	0	0	Peak Found	High	Not Found	Peak Found	1
High	Master Protein	A0R2Q6	Carnitinyl-CoA dehydratase OS=Mycolicibacterium smegmatis (strain ATCC 700084 / mc(2)155) OX=246196 GN=MSMEG_5198 PE=3 SV=1	MTETAPGALTERRGNVLLITINRPEARNAINSSVSQAVGDALAEAQNDPEVRAVVLTGAGDKSFCAGADLKAISRGENLFHPEHPEYGFAGYVSHFIDKPTIAAVNGTALGGGTELALASDLVVAEERAMFGLPEVKRGLIAGAGGVFRIIEQLPRKVALELVYTGDPISAADALKWGLINQVVPDGTVVDAALALAERITCNAPLAVQASKRVAYGAEEGTVPAEQPSWKRTNREFVTLLKTEDAMEGPLAFAQKRQPVWKAK	0	4.539	8	2	4	2	264	27.9	5.52	354.87	0	2	1			Pf00378	66736513	MSMEG_5198		A0R2Q6; msm:MSMEG_5198	0	0	High	High	Not Found	High	1
High	Master Protein	A0QX95	Indole-3-glycerol phosphate synthase OS=Mycolicibacterium smegmatis (strain ATCC 700084 / mc(2)155) OX=246196 GN=trpC PE=1 SV=1	MSSATVLDSIIEGVRADVAAREAVISLDEIKERAKAAPPPLNVMAALREPGIGVIAEVKRASPSRGALASIGDPAELAQAYQDGGARVISVLTEQRRFNGSLDDLDAVRAAVSIPVLRKDFIVRPYQIHEARAHGADMLLLIVAALDQPVLESLLERTESLGMTALVEVHTEEEADRALKAGASVIGVNARDLKTLEVDRTVFSRIAPGLPSNVIRVAESGVRGTADLLAYAGAGADAVLVGEGLVTSGDPRSAVADLVTAGTHPSCPKPAR	0	4.402	7	2	4	2	272	28.4	5.29	206.74	0	2	2	other metabolic processes		Pf00218	66734619	MSMEG_3219; MSMEI_3137	trpC	A0QX95; I7G8S9; msg:MSMEI_3137; msm:MSMEG_3219	0	0	Peak Found	High	Not Found	Peak Found	1
High	Master Protein	A0QP16	O-acetylhomoserine/O-acetylserine sulfhydrylase OS=Mycolicibacterium smegmatis (strain ATCC 700084 / mc(2)155) OX=246196 GN=MSMEG_0239 PE=3 SV=1	MTDRTFGLATRAIHAGQRPDAATGARVTPIYANASFVFNDTDDAANLFALQKYGNIYSRIGNPTVAAFEECIASLENGLGAVAMASGLSAQFAVFAALAGAGDHIVSAASLYGGTVTQLDVSLRRFGIDTTFVGGTDPADYAAAVTDRTRLIYAEVISNPSGEIADLAGLAEVARDAGVPLIVDSTVATPALCRPIEHGADIVVHSATKFIGGHGTTLGGVAVDAGRFDWGAGKFPQMTEPVASYGGLSWWGNFGEFGFLTKLRSEQLRDLGATLAPQSAFQLLQGVQTLPQRMAAHIANARAVAEWLEADPRVTYVRWAGLPSHPHHDRARHYLPDGPGAVFAFGVKGGRAAGEKFINSVQLASHLANIGDVRTLVVHPASTTHRQLTDEQLTAGGVG…	0	3.861	4	2	4	2	431	45.4	5.43	222.65	0	2	2	other metabolic processes		Pf01053	66738427	MSMEG_0239		A0QP16; msm:MSMEG_0239	0	0	Peak Found	High	Not Found	High	1
High	Master Protein	A0QZY4	Phosphoglycerate mutase family protein OS=Mycolicibacterium smegmatis (strain ATCC 700084 / mc(2)155) OX=246196 GN=MSMEG_4193 PE=4 SV=1	MTVILLRHGRSTSNTAHTLAGRSDGVDLDDRGREQAEGVVSRIGDLPVRAIVRSPMLRCERTIDPLATALGLQPIVDERLTEVDYGSWTGRKISDLLKEPLWSVVQAQPSAAVFPEGEGLAQVQARAVAAVRERDRALAAEHGADVLWVACTHGDVIKAVLADALGVHLDGFQRITADPASMSVVRYTELRPFVMHINHTGPQLSAGLAAEPKTDAVVGGSTD	0	3.595	9	2	4	2	223	23.8	6	245.24	0	2	2			Pf00300	66735540	MSMEG_4193		A0QZY4; msm:MSMEG_4193	0	0	Peak Found	High	High	Peak Found	1
High	Master Protein	A0R3L4	Bifunctional purine biosynthesis protein PurH OS=Mycolicibacterium smegmatis (strain ATCC 700084 / mc(2)155) OX=246196 GN=purH PE=3 SV=1	MSDKKPVRRALISVYDKTGLADLARGLHQAGVAIVSTGSTAKTIAAAGVPVTPVEQVTGFPEVLDGRVKTLHPRVHAGLLADTRKPEHLAALKELDVEAFELVVVNLYPFSETVASGASVDECVEQIDIGGPSMVRAAAKNHPSVAVVVDPLGYDGVLAAVRAGGFTLAERKKLASVAFRHTAEYDVAVASWMGSTLSPEEGSAEGGAVEPSLPQWFAGTWHRAAVLRYGENPHQKAAVYRDNAAWPGLAQAEQLHGKEMSYNNYTDADAAWRAAFDHEQTCVAIIKHANPCGIAISSTSVADAHRKAHECDPLSAFGGVIAANTEVSVEMAETISEIFTEVIIAPAYEPGAVEVLARKKNIRILVASQPPIGGTEVRQISGGLLLQQRDALDADGDDP…	0.002	3.441	4	2	4	2	527	55.4	5.68	214.66	0	2	2	other metabolic processes		Pf01808, Pf02142	66736815	MSMEG_5515	purH	A0R3L4; msm:MSMEG_5515	0	0	Peak Found	High	Not Found	High	1
High	Master Protein	A0R5N7	Aspartate-semialdehyde dehydrogenase OS=Mycolicibacterium smegmatis (strain ATCC 700084 / mc(2)155) OX=246196 GN=asd PE=3 SV=1	MVNIGVVGATGQVGQVMRNLLEQRNFPATSVRFFASPRSEGKKLTFRGQEIEVENAETADPSGLDIALFSAGATMSRVQAPRFAEAGVIVVDNSSAFRKDPDVPLVVSEVNFDRDVRGKKLAKGIIANPNCTTMAAMPVLKPLHEEAGLQRLIVSSYQAVSGSGIAGVEELAGQARAVIDGVEQLVHDGSALQYPAPNKYVAPIAFNIVPLAGNYVDDGSGETDEDQKLRNESRKILGIPELLVSGTCVRVPVFSGHSLSINAEFSQPISVERTKELLSAAAGVKLVDVPTPLAAAGIDDCLVGRIRQDPGVPDGRGLALFVSGDNLRKGAALNTIQIAELLAADL	0	6.179	8	2	3	2	346	36.5	5.25	310.5	0	2	1	other metabolic processes		Pf01118, Pf02774	66737539	MSMEG_6256	asd	A0R5N7; msm:MSMEG_6256	0	0	Peak Found	Peak Found	Not Found	High	1
