# Supplementary material for: Wag31, a membrane tether, is crucial for lipid homeostasis in mycobacteria
Source: eLife journal article supplement (doi:10.7554/elife.104268), 2025-01-17
Supplement: fig4-data1 [file elife-104268-fig4-data1-v1.zip]

Figure 4-Source Data 1

Figure 4b: Source Data

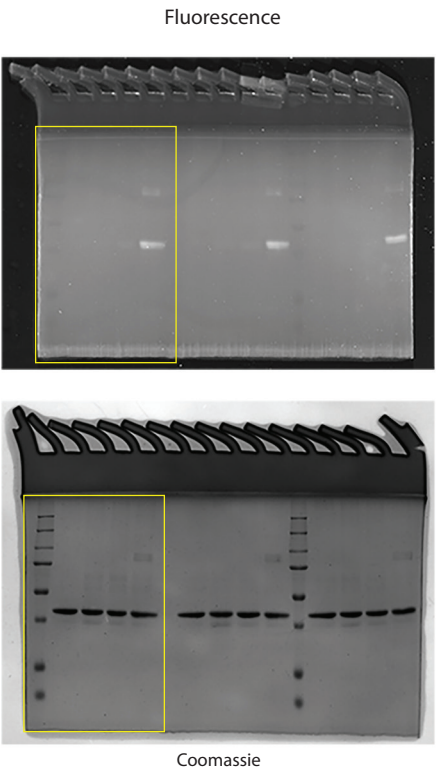

Figure 4c: Source Data  
Fluorescence

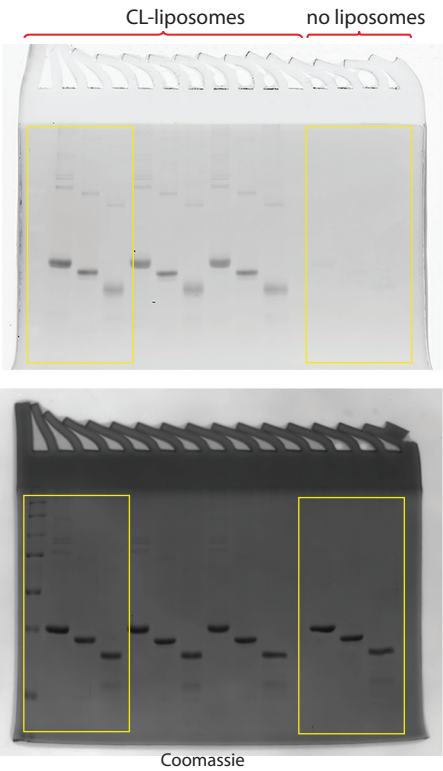

Regions marked were used for making the Figure
