# Supplementary material for: Wag31, a membrane tether, is crucial for lipid homeostasis in mycobacteria
Source: eLife journal article supplement (doi:10.7554/elife.104268), 2025-01-17
Supplement: fig4-data3 [file elife-104268-fig4-data3-v1.zip]

## Sheet: Figure 4d & g
Figure 4d-Source data - Source data for Figure 4 d																									Figure 4g-Source Data
Wag31			Wag31 K20A			Wag31 delN																			only lip	+FL	only lip	+FL	+K20A	+delN
23814	18185	17447	19506	18639	17363	10066	9922	9951																	811	341	520	9640	4958	1004
																									686	167	330	12535	5118	909
Raw Data used for arriving at the values give above																									1796	253	319	6385	1755	613
no-liposomes_wildtype Wag31		no-liposomes_Wag31K20A		no-liposomes_Wag31deltaN		wildtype Wag31 rep 1		wildtype Wag31 rep 2		wildtype Wag31 rep 3		Wag31K20A rep 1		Wag31K20A rep 2		Wag31K20A rep 3		Wag31 DeltaN rep1		Wag31 DeltaN rep2		Wag31 DeltaN rep3			752	260	662	6148	2084	574
Distance_(cm)	effective intensity	Distance_(cm)	effective intensity	Distance_(cm)	effective intensity	Distance_(cm)	effective intensity	Distance_(cm)	effective intensity	Distance_(cm)	effective intensity	Distance_(cm)	effective intensity	Distance_(cm)	effective intensity	Distance_(cm)	effective intensity	Distance_(cm)	effective intensity	Distance_(cm)	effective intensity	Distance_(cm)	effective intensity		810	234	370	3948	2610	2445
0	-267.861	0	-138.111	0	-20.5	0	-270.306	0	115.24	0	217.223	0	-61.0283	0	0.555664	0	48.1387	0	20.2773	0	238.139	0	305.723		989	625	414	4927	1851	2227
0.01	-266.056	0.01	-162.278	0.01	-40.7227	0.01	-268.111	0.01	86.6865	0.01	140.917	0.01	-67.8613	0.01	-76.4443	0.01	45.75	0.01	-13.833	0.01	265.806	0.01	264.417		899	229	376	7183	1513	609
0.02	-228.194	0.02	-182.139	0.02	-85.8057	0.02	-100.333	0.02	76.7598	0.02	174.472	0.02	-49.9717	0.02	-97.6397	0.02	129.473	0.02	-83.417	0.02	301.972	0.02	287.277		677	169	312	9296	1751	1295
0.03	-232.972	0.03	-189.306	0.03	-164.473	0.03	-111.473	0.03	150.481	0.03	234.611	0.03	-76.8603	0.03	-48.583	0.03	132.278	0.03	-90.8613	0.03	282.139	0.03	307.889		726	362	618	12432	1720	807
0.04	-214.14	0.04	-185.389	0.04	-264.25	0.04	-154	0.04	208.307	0.04	289.139	0.04	-63.4443	0.04	-21.7773	0.04	120.083	0.04	-57.417	0.04	227.167	0.04	285.64		1311	247	485	6233	1466	1399
0.05	-156.611	0.05	-162.25	0.05	-246.527	0.05	-185.306	0.05	189.66	0.05	219.722	0.05	-33.8897	0.05	34.9443	0.05	95.083	0.05	-51.0273	0.05	231.39	0.05	247.277		2156	273	482	11041	1956	851
0.06	-155.333	0.06	-163.5	0.06	-227.222	0.06	-191.25	0.06	168.36	0.06	90.7217	0.06	71	0.06	85.5283	0.06	118.083	0.06	-56.1397	0.06	272	0.06	259.028		984	213	671	5112	2214	597
0.07	-73.3897	0.07	-89.0273	0.07	-260.667	0.07	-163.444	0.07	160.533	0.07	85.916	0.07	60.6103	0.07	98.9727	0.07	198.167	0.07	-121.916	0.07	232.806	0.07	303.39		1241	218	1050	3973	2155	592
0.08	-42.9727	0.08	-36.75	0.08	-273.223	0.08	-144.334	0.08	178.28	0.08	190.444	0.08	22.3896	0.08	131.056	0.08	203.139	0.08	-193.167	0.08	187.833	0.08	337.139		834	164	312	17454	1625	700
0.09	-18.1113	0.09	-71.4727	0.09	-250.667	0.09	-128.444	0.09	170.573	0.09	248.944	0.09	-28.75	0.09	69.833	0.09	178.75	0.09	-187.833	0.09	255.972	0.09	326.083		661	233	308	8062	1795	1498
0.1	48.3613	0.1	-37.5557	0.1	-235.944	0.1	-46.0273	0.1	275.04	0.1	238.639	0.1	-40.167	0.1	142.5	0.1	147.639	0.1	-156.694	0.1	249.083	0.1	310.277		1446	389	296	17712	3117	2312
0.11	35	0.11	-49.084	0.11	-232.083	0.11	-4.58301	0.11	333.76	0.11	184.834	0.11	7.61133	0.11	120.222	0.11	168.916	0.11	-100.36	0.11	247.806	0.11	332.194		687	295	377	5502	1771	1483
0.12	29.5	0.12	-78.8613	0.12	-250.361	0.12	6.22266	0.12	376.073	0.12	227.083	0.12	-8.75	0.12	174.528	0.12	217.417	0.12	-108.556	0.12	258.333	0.12	335.667		743	180	518	6041	1791	1956
0.13	46.9727	0.13	-76.083	0.13	-171.5	0.13	-78.917	0.13	302.987	0.13	294.389	0.13	-51.1943	0.13	111.194	0.13	203.11	0.13	-162.111	0.13	226.25	0.13	345.694		681	216	359	4515	4083	990
0.14	106.583	0.14	-3.91602	0.14	-98.25	0.14	-24.417	0.14	250.18	0.14	333.333	0.14	-61.3613	0.14	-49.8897	0.14	205.194	0.14	-112.473	0.14	284.14	0.14	320.944		695	280	516	4056	5058	653
0.15	52.75	0.15	-39.334	0.15	-35.584	0.15	-14.1387	0.15	277.78	0.15	348.917	0.15	-170.583	0.15	-34.166	0.15	213.278	0.15	-138.777	0.15	246.527	0.15	322.666		790	186	4557	9448	1347	1065
0.16	31.5273	0.16	-59.5273	0.16	-28.1387	0.16	-85.7227	0.16	296.533	0.16	272.027	0.16	-134.917	0.16	6.55566	0.16	229.833	0.16	-202.194	0.16	189.806	0.16	327.944		1912	314	615	13677	3720	577
0.17	7.41699	0.17	-67	0.17	-53.333	0.17	-58	0.17	280.58	0.17	300.75	0.17	-67.25	0.17	-13.2773	0.17	236.916	0.17	-264.056	0.17	165.889	0.17	283.973		845	246	438	11367	1314	613
0.18	-34.4443	0.18	-34.833	0.18	-8.52734	0.18	-54.583	0.18	262.033	0.18	321.5	0.18	-115	0.18	56.3887	0.18	267.306	0.18	-214.277	0.18	150	0.18	351.277		1020	269	366	7354	3669	565
0.19	-31.6387	0.19	-3.25	0.19	87.1113	0.19	-85.9443	0.19	272.96	0.19	330.444	0.19	-107.694	0.19	17.5273	0.19	222.61	0.19	-158.584	0.19	242.89	0.19	450.306		863	209	544	7674	2097	1750
0.2	47.3613	0.2	-49.6113	0.2	24.2773	0.2	6.44434	0.2	322.32	0.2	354.056	0.2	-119.556	0.2	70.6103	0.2	238.194	0.2	-207.056	0.2	247.167	0.2	404.111		890	305	346	11081	1828	681
0.21	161.777	0.21	-43.667	0.21	-2.5	0.21	-17.1113	0.21	293.967	0.21	324.027	0.21	-122.723	0.21	55.7773	0.21	186.723	0.21	-73.3887	0.21	260.61	0.21	321.694		732	896	512	9247	1720	2253
0.22	60.7773	0.22	-15.8896	0.22	-57.1387	0.22	-7	0.22	279.019	0.22	314.444	0.22	-55.4727	0.22	-4.52832	0.22	205.722	0.22	-58.084	0.22	231.833	0.22	296.39		1280	210	766	6905	1573	1167
0.23	77.6113	0.23	-34.7227	0.23	-50.9727	0.23	0.52832	0.23	269.567	0.23	348.361	0.23	7.41699	0.23	0.861328	0.23	185.556	0.23	-86.0273	0.23	214	0.23	293.361		2301	240	832	11163	2202	697
0.24	66.3057	0.24	34.917	0.24	-42.7217	0.24	-26.6396	0.24	332.62	0.24	383.306	0.24	-8.22266	0.24	99.4443	0.24	231.723	0.24	-122.723	0.24	201.667	0.24	232.5		1065	166	625	7332	6010	680
0.25	21.75	0.25	68.8057	0.25	-14.25	0.25	-99.2783	0.25	265.44	0.25	436.527	0.25	-22.5	0.25	53.8613	0.25	286.361	0.25	-179.611	0.25	191.833	0.25	211.25		769	200	414	10837	4544	917
0.26	-2.55566	0.26	33.3613	0.26	-8.86133	0.26	-2.11035	0.26	256.44	0.26	440.472	0.26	17.2783	0.26	25.5	0.26	288.667	0.26	-139.972	0.26	215.306	0.26	227.861		972	190	515	33549	2461	814
0.27	11.9443	0.27	-2.30566	0.27	30.584	0.27	103.917	0.27	226.227	0.27	404.111	0.27	-30.25	0.27	10.5	0.27	245.083	0.27	-91.2227	0.27	259.361	0.27	273.306		1945	340	616	7109	1285	846
0.28	71.5557	0.28	68.7773	0.28	77.8057	0.28	79.584	0.28	291.32	0.28	352.389	0.28	-107.639	0.28	49.4727	0.28	213.25	0.28	-145.723	0.28	273.056	0.28	298.611		2054	215	871	9631	1686	966
0.29	146.056	0.29	98.1387	0.29	32.8603	0.29	74.2783	0.29	339.707	0.29	357.139	0.29	-82.7773	0.29	85.6943	0.29	193.444	0.29	-105.556	0.29	243.139	0.29	352.222		790	213	320	9411	5516	1041
0.3	57.8613	0.3	71.9443	0.3	-74.8057	0.3	-13.3057	0.3	253.407	0.3	276.833	0.3	-54.5557	0.3	72.4717	0.3	209.36	0.3	-85.8897	0.3	271.306	0.3	374.583		915	191	703	17826	1556	3044
0.31	-35.0557	0.31	14.2227	0.31	-57.2217	0.31	17.3057	0.31	229.693	0.31	257.056	0.31	-35.3613	0.31	51.9727	0.31	226.527	0.31	-92.1943	0.31	295.528	0.31	335.973		1280	287	522	8230	1780	3957
0.32	62.3613	0.32	-42.0283	0.32	-28.333	0.32	107.639	0.32	270.653	0.32	207.75	0.32	-90.1397	0.32	84.25	0.32	189.639	0.32	-88.1387	0.32	322.917	0.32	300.583		748	160	473	13491	4063	661
0.33	18.8604	0.33	-53.916	0.33	0.805664	0.33	168.306	0.33	248.34	0.33	246.167	0.33	-4.30566	0.33	49.6103	0.33	186.223	0.33	-68.6113	0.33	316.389	0.33	279.25		884	234	408	4394	4394	1831
0.34	26.167	0.34	26.7227	0.34	-73.6397	0.34	132.5	0.34	243.727	0.34	286.75	0.34	-91.417	0.34	48.9443	0.34	167.666	0.34	-84.333	0.34	297.666	0.34	270.056		834	557	344	11113	1339	995
0.35	50.6943	0.35	36.1103	0.35	-144.417	0.35	73.0557	0.35	295.113	0.35	201.167	0.35	-176.5	0.35	72.4443	0.35	160.25	0.35	-98.7217	0.35	286.527	0.35	265.889		1504	1303	381	8425	1816	567
0.36	11.9717	0.36	-15.3613	0.36	-174.167	0.36	50.5273	0.36	349.667	0.36	166.111	0.36	-154.306	0.36	18.3613	0.36	202.806	0.36	-39.583	0.36	305.473	0.36	222.833		685	162	496	7026	2210	762
0.37	-3.66699	0.37	-69.3613	0.37	-145.028	0.37	26.3057	0.37	258.46	0.37	205.667	0.37	-88.333	0.37	-16.417	0.37	136.75	0.37	-36.5557	0.37	330.056	0.37	246.361		2119	202	516	12422	1835	879
0.38	-18.417	0.38	-61.417	0.38	-133.111	0.38	11.5557	0.38	205.967	0.38	248.666	0.38	-116.194	0.38	9.80566	0.38	138.777	0.38	-61.5	0.38	349.75	0.38	272.611		1433	162	308	4881	2066	590
0.39	35.6387	0.39	11.417	0.39	-171.444	0.39	39.8887	0.39	188.987	0.39	193.777	0.39	-57.5	0.39	55.1387	0.39	189.723	0.39	-47.2227	0.39	361.777	0.39	319.25		976	176	1123	15024	3982	735
0.4	41.2773	0.4	0.27832	0.4	-177.028	0.4	2.86133	0.4	206.007	0.4	131.223	0.4	-114.527	0.4	110.473	0.4	205.417	0.4	-70.3897	0.4	419.777	0.4	314.361		1127	229	792	19091	1562	1129
0.41	11.7783	0.41	1.58398	0.41	-90.167	0.41	28.4443	0.41	97.8867	0.41	106.416	0.41	-138	0.41	87.1943	0.41	165.527	0.41	-60.583	0.41	429.917	0.41	286.583		660	173	324	14007	1781	705
0.42	95.9717	0.42	-31.916	0.42	-46.3613	0.42	102.834	0.42	63.7266	0.42	67.166	0.42	-149.027	0.42	59.7227	0.42	207.694	0.42	-22.0557	0.42	456.361	0.42	272.444		1311	188	346	8009	1938	573
0.43	49.3887	0.43	-75.1943	0.43	-15.1943	0.43	13.0557	0.43	48.7666	0.43	49.5557	0.43	-132.222	0.43	46.583	0.43	277.777	0.43	-24.417	0.43	425.667	0.43	277.556		1084	338	476	4298	1290	2402
0.44	105.917	0.44	-65.6943	0.44	-44.3887	0.44	50.2217	0.44	94.9404	0.44	24.9443	0.44	-277.111	0.44	38.2773	0.44	241.944	0.44	-25.0557	0.44	315.75	0.44	282.473		800	247	456	5798	3151	984
0.45	103.277	0.45	-9.19434	0.45	-115.889	0.45	-4.41602	0.45	69.4932	0.45	96.7773	0.45	-190.861	0.45	19.333	0.45	168.833	0.45	10.1113	0.45	321.083	0.45	334.25		1275	234	358	8906	3752	1099
0.46	116.389	0.46	-4.80566	0.46	-112.11	0.46	-59.7227	0.46	17.3867	0.46	138	0.46	-155.14	0.46	95.3057	0.46	274.083	0.46	53.7773	0.46	332.473	0.46	343.389		1420	355	391	5317	2087	967
0.47	165.278	0.47	-28.3057	0.47	-8.72266	0.47	-111	0.47	-12.4404	0.47	175.694	0.47	-152.111	0.47	126.389	0.47	259.361	0.47	-8.75	0.47	356.667	0.47	322.111		678	222	387	10257	1303	1343
0.48	121.139	0.48	-49.0273	0.48	79.5	0.48	4.80566	0.48	86.3467	0.48	144.584	0.48	-192.417	0.48	132.694	0.48	250.973	0.48	-41.3057	0.48	414.194	0.48	387.694		2115	175	307	4659	1554	973
0.49	51.333	0.49	-77.1103	0.49	122.64	0.49	12.833	0.49	167.633	0.49	138.778	0.49	-51.9717	0.49	203.056	0.49	165.973	0.49	-69.9727	0.49	394.583	0.49	436.611		1771	167	893	7992	2192	960
0.5	95.6387	0.5	-55.0273	0.5	108.139	0.5	88.7217	0.5	140.413	0.5	129.722	0.5	-59.5557	0.5	285.806	0.5	159.222	0.5	-92.75	0.5	393.194	0.5	461		1350	231	333	3990	1467	838
0.51	86	0.51	-34.833	0.51	98.167	0.51	95.7773	0.51	69.3135	0.51	99.2783	0.51	-110.556	0.51	337.694	0.51	242.11	0.51	-45.9727	0.51	372.5	0.51	435.917		778	255	559	6726	2120	1813
0.52	116.556	0.52	-66.3613	0.52	146.36	0.52	-70.1943	0.52	34.7402	0.52	73.6113	0.52	-130.639	0.52	344.028	0.52	315.75	0.52	45.9443	0.52	297.723	0.52	424.056		1172	423	380	8025	6701	712
0.53	126.916	0.53	-122.417	0.53	185.223	0.53	-127.027	0.53	2.04688	0.53	151.917	0.53	-106.972	0.53	314.556	0.53	318.361	0.53	2.36133	0.53	223.806	0.53	408.277		1082	238	584	4240	6009	927
0.54	52.417	0.54	-96.6103	0.54	181.584	0.54	-40.7783	0.54	26.8926	0.54	154.889	0.54	-16.083	0.54	325.723	0.54	370.611	0.54	-30.4727	0.54	257.556	0.54	393.86		1503	261	634	10656	5556	2075
0.55	117.833	0.55	-94.1387	0.55	178.667	0.55	106.583	0.55	-40.2666	0.55	54.3603	0.55	-42.8057	0.55	196.86	0.55	451.277	0.55	-80.4717	0.55	308.36	0.55	377.944		2281	214	459	7906	2384	1780
0.56	81.916	0.56	-125.916	0.56	155.083	0.56	76.25	0.56	-29.1729	0.56	17.9443	0.56	-84.5557	0.56	209.694	0.56	348	0.56	-62.3057	0.56	232.028	0.56	379.917		884	538	437	4603	2563	1875
0.57	22.4717	0.57	-108.111	0.57	155.777	0.57	29.9443	0.57	79.0469	0.57	112.222	0.57	-127.972	0.57	263.278	0.57	359.056	0.57	-93.2773	0.57	175.389	0.57	342.416		1353	189	296	13531	2419	1929
0.58	64.8057	0.58	-106.973	0.58	165.39	0.58	37.167	0.58	114.253	0.58	138.473	0.58	-220.527	0.58	225.889	0.58	388.61	0.58	-120.639	0.58	175.083	0.58	357.889		1354	279	427	8332	1547	991
0.59	143.75	0.59	-111.223	0.59	175.333	0.59	61.25	0.59	15.8066	0.59	168.833	0.59	-130.89	0.59	189.472	0.59	349.889	0.59	-141.056	0.59	235.083	0.59	355.527		1440	559	754	13261	2265	2247
0.6	140.306	0.6	-81.1103	0.6	164.667	0.6	193.027	0.6	-29.7471	0.6	158.194	0.6	-146.36	0.6	145.083	0.6	318.778	0.6	-163.973	0.6	294.833	0.6	391.056		982	161	629	4789	4866	2557
0.61	172.973	0.61	-92.3603	0.61	192.806	0.61	139.278	0.61	25.4326	0.61	183.083	0.61	-127.973	0.61	197.889	0.61	266.056	0.61	-149.444	0.61	348.083	0.61	410.861		1249	186	323	11444	1818	716
0.62	239.667	0.62	-120.639	0.62	184.306	0.62	109.36	0.62	44.3926	0.62	104.472	0.62	-134.777	0.62	212.194	0.62	351.75	0.62	-50.1397	0.62	416.083	0.62	412.417		787	222	591	4455	1522	1932
0.63	179.611	0.63	-80.4727	0.63	130.527	0.63	76.6387	0.63	49.9268	0.63	21.084	0.63	-100.694	0.63	137.194	0.63	391.75	0.63	-71.6943	0.63	408.777	0.63	408.444		1613	233	337	4182	3725	623
0.64	173.139	0.64	-99.583	0.64	79.833	0.64	91.3057	0.64	60.7529	0.64	-55.8613	0.64	-182.806	0.64	287.917	0.64	336.417	0.64	-88.6943	0.64	372	0.64	420.444		1294	295	632	14578	1547	1527
0.65	213.61	0.65	-181.111	0.65	97.5	0.65	89.417	0.65	19.2734	0.65	145.944	0.65	-229.167	0.65	337.833	0.65	250.64	0.65	-6.44434	0.65	419.86	0.65	390.528		1541	185	407	14831	1921	808
0.66	216.556	0.66	-179.167	0.66	117.528	0.66	164.361	0.66	-95.3203	0.66	208.166	0.66	-235.083	0.66	349.5	0.66	290.639	0.66	69.7773	0.66	442.444	0.66	338.306		840	192	931	5189	1415	831
0.67	213.473	0.67	-147.583	0.67	79.5	0.67	267.306	0.67	-408.84	0.67	134.222	0.67	-260.917	0.67	349.889	0.67	282.361	0.67	80.8887	0.67	371.306	0.67	291.083		1635	326	385	5321	2882	1814
0.68	249.056	0.68	-82.3057	0.68	21.2227	0.68	258.806	0.68	-293.4	0.68	142.222	0.68	-155.167	0.68	342.223	0.68	246.973	0.68	115.223	0.68	334.167	0.68	297.056		2072	336	553	16175	1577	588
0.69	189.944	0.69	-107.667	0.69	48.7227	0.69	226.417	0.69	-126.287	0.69	200	0.69	-144.777	0.69	410.25	0.69	225.166	0.69	145.722	0.69	387.084	0.69	359.861		805	184	1022	13785	3308	2195
0.7	187.389	0.7	-140.473	0.7	36.3897	0.7	316.027	0.7	-59.627	0.7	196.444	0.7	-57.2773	0.7	399.167	0.7	258.89	0.7	92.2783	0.7	506.027	0.7	331.583		1449	170	872	5665	4679	935
0.71	174.39	0.71	-103.14	0.71	61.2217	0.71	416.334	0.71	-4.85254	0.71	137.39	0.71	51.416	0.71	529.223	0.71	249.417	0.71	186.056	0.71	527.222	0.71	322		1293	342	615	6382	3019	915
0.72	182.194	0.72	-67.8897	0.72	56.5557	0.72	416.556	0.72	24.7666	0.72	156.25	0.72	29.2217	0.72	540.583	0.72	306.056	0.72	204.778	0.72	552.027	0.72	375.084		2054	190	299	15323	3466	1391
0.73	153.694	0.73	-43.2227	0.73	-21.2783	0.73	400.223	0.73	61.2529	0.73	76.9727	0.73	138.639	0.73	514.194	0.73	368.722	0.73	234.89	0.73	617.278	0.73	503.223		722	257	711	9532	1951	651
0.74	90.6397	0.74	-9.63867	0.74	-67.1943	0.74	393.333	0.74	72.9072	0.74	98.4443	0.74	143.584	0.74	526.139	0.74	421.64	0.74	284.583	0.74	650.889	0.74	543.194		661	171	536	8371	3712	893
0.75	70.5273	0.75	26.4443	0.75	-23.25	0.75	422.89	0.75	-0.980469	0.75	188.86	0.75	186.916	0.75	492.86	0.75	481	0.75	283.333	0.75	599.778	0.75	501.556		719	1414	443	8569	2405	736
0.76	79.167	0.76	9.97168	0.76	-6.97266	0.76	387.694	0.76	44.2998	0.76	232.277	0.76	242.666	0.76	498.194	0.76	467.027	0.76	264.777	0.76	659.861	0.76	443.223		920	168	388	3794	1515	621
0.77	149.584	0.77	17.6113	0.77	41.6387	0.77	302.973	0.77	79.9326	0.77	211.611	0.77	278.777	0.77	524.083	0.77	493.361	0.77	233.5	0.77	690.86	0.77	446.028		1082	196	486	8838	2489	724
0.78	183.5	0.78	57.333	0.78	82.3057	0.78	339.806	0.78	80.0928	0.78	231.61	0.78	298.417	0.78	522.723	0.78	606.027	0.78	206.694	0.78	604.916	0.78	512.5		952	209	316	5510	2158	1717
0.79	185.39	0.79	97.4727	0.79	-100.527	0.79	305.556	0.79	72.3525	0.79	259.472	0.79	247.75	0.79	405.611	0.79	577.89	0.79	277.944	0.79	616.944	0.79	573.389		803	539	648	5259	2808	581
0.8	83.417	0.8	135.444	0.8	-106.527	0.8	324.139	0.8	104.667	0.8	312.194	0.8	282.806	0.8	421.361	0.8	570.139	0.8	222.056	0.8	626.5	0.8	599.584		1716	318	348	4927	3141	609
0.81	1.91602	0.81	141.5	0.81	151.25	0.81	324.472	0.81	151.04	0.81	117.584	0.81	334.777	0.81	430.167	0.81	536.277	0.81	219.833	0.81	596.223	0.81	606.389		845	475	632	8948	2155	775
0.82	-61.2773	0.82	177.861	0.82	180.5	0.82	231.473	0.82	189.92	0.82	158.611	0.82	292.944	0.82	386.389	0.82	543.36	0.82	233.444	0.82	600.639	0.82	740.806		817	185	1094	6832	1652	984
0.83	18.1113	0.83	238.472	0.83	155.056	0.83	191.75	0.83	204	0.83	219	0.83	316.444	0.83	367.417	0.83	597.833	0.83	233.223	0.83	580.167	0.83	752.027		751	431	440	5883	3062	632
0.84	67.666	0.84	268.25	0.84	158	0.84	299.528	0.84	285.4	0.84	319.806	0.84	212.223	0.84	328.5	0.84	548.917	0.84	226.75	0.84	549.417	0.84	677.666		1005	166	382	11091	5432	1176
0.85	29.4443	0.85	207.806	0.85	284.139	0.85	284.36	0.85	254.347	0.85	341.5	0.85	193.14	0.85	184.86	0.85	525.527	0.85	298.361	0.85	542.944	0.85	615.917		1652	434	437	5609	5486	1100
0.86	21.2773	0.86	200.194	0.86	328.723	0.86	311.639	0.86	248.493	0.86	329.111	0.86	148.944	0.86	207.667	0.86	540.639	0.86	319.14	0.86	524.777	0.86	650.861		663	230	510	5343	2580	1868
0.87	118.556	0.87	256.889	0.87	316.389	0.87	322.083	0.87	231.547	0.87	217.639	0.87	188.834	0.87	273.916	0.87	473.973	0.87	315.916	0.87	570	0.87	649.25		946	246	346	6923	1404	587
0.88	136.889	0.88	235.723	0.88	264.194	0.88	323.583	0.88	289.407	0.88	227.167	0.88	223.694	0.88	318.473	0.88	456.083	0.88	426.527	0.88	607.639	0.88	601.277		1607	259	430	8183	6995	967
0.89	-23.167	0.89	233.777	0.89	321.777	0.89	272.25	0.89	237.481	0.89	351.083	0.89	244.639	0.89	287.723	0.89	406.917	0.89	522.361	0.89	605.861	0.89	570.723		670	436	365	6229	1354	1083
0.9	7.94434	0.9	232.444	0.9	338.473	0.9	353.833	0.9	243.06	0.9	428.278	0.9	253.777	0.9	255.639	0.9	366.556	0.9	523.973	0.9	673.11	0.9	530.278		1231	213	652	7487	4450	2882
0.91	64.834	0.91	289.389	0.91	317.5	0.91	388.417	0.91	229.76	0.91	393.639	0.91	198.722	0.91	290.75	0.91	368.361	0.91	524.916	0.91	768.056	0.91	528.75		768	171	335	7190	5579	2193
0.92	44.417	0.92	299.5	0.92	302.611	0.92	351.277	0.92	152.78	0.92	338.5	0.92	219.861	0.92	270.277	0.92	313.861	0.92	636.556	0.92	826.222	0.92	631.5		726	170	360	9835	2129	1331
0.93	0.0556641	0.93	296.222	0.93	311.723	0.93	264.667	0.93	56.2998	0.93	412.694	0.93	203.556	0.93	215.556	0.93	292.361	0.93	694.389	0.93	857.944	0.93	730.139		765	168	942	8181	6411	897
0.94	-41.0273	0.94	288.083	0.94	325.166	0.94	290.723	0.94	-560.153	0.94	452.111	0.94	62.917	0.94	103.333	0.94	365.389	0.94	677.667	0.94	940.528	0.94	740.306		1726	333	423	8555	5646	633
0.95	-43.6397	0.95	252.167	0.95	376.361	0.95	275.639	0.95	-961.94	0.95	403.722	0.95	74.1387	0.95	82.834	0.95	315.416	0.95	845.223	0.95	1056.42	0.95	706.584		1208	170	411	7398	1336	607
0.96	-99.1387	0.96	220.417	0.96	383	0.96	235.556	0.96	-979.727	0.96	433.5	0.96	86.25	0.96	129.667	0.96	194.36	0.96	880.223	0.96	1151.56	0.96	789.556		798	403	503	4235	1614	800
0.97	16.8057	0.97	76.6943	0.97	364.306	0.97	331.167	0.97	-325.24	0.97	454.556	0.97	160.084	0.97	101.11	0.97	178.056	0.97	963	0.97	1199.19	0.97	810.084		1587	199	298	7501	4432	1462
0.98	79.25	0.98	13.334	0.98	328.444	0.98	506.083	0.98	218.733	0.98	441.584	0.98	115.889	0.98	88.9727	0.98	184.61	0.98	1056.08	0.98	1245.56	0.98	915.889		785	175	400	3796	2537	679
0.99	-43.334	0.99	276.416	0.99	346.056	0.99	478.833	0.99	377.927	0.99	606.056	0.99	72.8613	0.99	67.1387	0.99	161.306	0.99	1203.28	0.99	1310.53	0.99	1006.69		775	169	346	9159	2810	1771
1	-34.7783	1	323.694	1	366.834	1	278.86	1	481.773	1	575.417	1	-28.5557	1	-10.9443	1	161.861	1	1275.97	1	1408	1	1030.06		1339	183	547	10057	2176	1268
1.01	-48.3057	1.01	294.139	1.01	313.223	1.01	493.806	1.01	487.82	1.01	607.723	1.01	-5.11035	1.01	75.5	1.01	259.277	1.01	1413.22	1.01	1537.03	1.01	1055.83		1164	207	796	17573	2541	804
1.02	-78.5557	1.02	285.527	1.02	253.667	1.02	515.833	1.02	559.12	1.02	610.972	1.02	39.1943	1.02	146.861	1.02	307.89	1.02	1445.17	1.02	1595.61	1.02	1175.47		670	345	362	3693	1424	1333
1.03	-62.667	1.03	301.473	1.03	312.806	1.03	628.139	1.03	576.92	1.03	676.056	1.03	11.667	1.03	115.528	1.03	199.056	1.03	1312.44	1.03	1625.14	1.03	1290.58		1627	246	304	4187	7026	1309
1.04	11.833	1.04	268.611	1.04	283.028	1.04	676.834	1.04	728.907	1.04	700.917	1.04	-18.2773	1.04	122.473	1.04	124.194	1.04	1340.33	1.04	1687.86	1.04	1392.11		1032	338	426	7945	1788	653
1.05	74.6113	1.05	205.584	1.05	265.111	1.05	689.972	1.05	789.873	1.05	710.278	1.05	-37.7227	1.05	164.639	1.05	89.3057	1.05	1287.58	1.05	1713.03	1.05	1455.81		1330	263	366	10152	8909	961
1.06	33.5273	1.06	271.194	1.06	331.5	1.06	742.806	1.06	818.653	1.06	716.416	1.06	-64	1.06	167.194	1.06	42.8057	1.06	1181.81	1.06	1682.75	1.06	1566.42		919	303	530	4841	1330	619
1.07	-49.0557	1.07	282.556	1.07	290.194	1.07	781.723	1.07	739.787	1.07	817.806	1.07	-92.1113	1.07	154.472	1.07	101.834	1.07	1078.69	1.07	1521.14	1.07	1589.81		2062	366	415	5803	1962	565
1.08	-60.8613	1.08	233.694	1.08	275.723	1.08	891.917	1.08	757.787	1.08	800.472	1.08	-17.917	1.08	205.416	1.08	96.5273	1.08	1036.44	1.08	1421.75	1.08	1579.53		1090	452	360	10537	2785	725
1.09	42.6943	1.09	266.806	1.09	261.834	1.09	933.389	1.09	696.94	1.09	806.556	1.09	-18.3896	1.09	193.723	1.09	53.167	1.09	1107.97	1.09	1270.36	1.09	1563.03		818	198	455	7090	3047	1762
1.1	19.7217	1.1	304.473	1.1	269.694	1.1	911.473	1.1	649.953	1.1	776.584	1.1	-13.6387	1.1	190.139	1.1	53.25	1.1	1028.31	1.1	1189.89	1.1	1527.5		921	550	938	13734	1815	1861
1.11	64.6943	1.11	290.583	1.11	297.223	1.11	903.194	1.11	592.047	1.11	830.056	1.11	60.75	1.11	108.722	1.11	95.583	1.11	879.167	1.11	1115.67	1.11	1527.61		735	303	341	6336	1319	1655
1.12	-11.75	1.12	252.223	1.12	305.027	1.12	957.417	1.12	473.693	1.12	969.111	1.12	-5.52832	1.12	65.0273	1.12	102.611	1.12	666.889	1.12	1041.03	1.12	1496.67		1231	244	370	6947	3949	2616
1.13	-509.39	1.13	203.584	1.13	265.861	1.13	797.61	1.13	381.547	1.13	712.111	1.13	10.0273	1.13	-21.4443	1.13	169.75	1.13	534.306	1.13	976.889	1.13	1447.56		898	953	561	4291	1382	1207
1.14	-1032.72	1.14	208.389	1.14	199.944	1.14	765.25	1.14	394.753	1.14	603.139	1.14	-6.11133	1.14	-4.33398	1.14	96.666	1.14	468.334	1.14	919.417	1.14	1368.61		1252	1349	565	5777	1379	575
1.15	-227.5	1.15	162.611	1.15	228.25	1.15	723.111	1.15	354.867	1.15	600.5	1.15	-33.1113	1.15	43.5557	1.15	120.084	1.15	484.444	1.15	738.333	1.15	1201.14		764	173	414	4171	1837	935
1.16	105.166	1.16	91.2227	1.16	214.056	1.16	579	1.16	353.847	1.16	591.556	1.16	-24.1387	1.16	83.2773	1.16	56.417	1.16	434.334	1.16	623.722	1.16	1112.08		889	266	392	4032	1695	5194
1.17	127.556	1.17	83.7227	1.17	207.028	1.17	423.277	1.17	364.84	1.17	550.028	1.17	-33.9727	1.17	99.9727	1.17	66	1.17	368.723	1.17	635.056	1.17	1015.81		821	172	427	5424	3360	968
1.18	98.2783	1.18	135.556	1.18	164.861	1.18	408.306	1.18	336.981	1.18	555.556	1.18	28.8057	1.18	109.667	1.18	71.834	1.18	389.027	1.18	682.833	1.18	951.973		838	198	490	5593	1379	908
1.19	83.167	1.19	197.444	1.19	215.5	1.19	410.89	1.19	236	1.19	542.083	1.19	36.6387	1.19	122.194	1.19	57.2773	1.19	347.917	1.19	652.333	1.19	864.333		1979	296	383	5397	1965	809
1.2	38.0557	1.2	176.806	1.2	265.444	1.2	317.834	1.2	252.593	1.2	486.333	1.2	26.166	1.2	134.639	1.2	33.0557	1.2	332.89	1.2	618.806	1.2	789.11		707	190	351	15170	1758	1145
1.21	-55.5283	1.21	113.86	1.21	200.277	1.21	229.916	1.21	274.78	1.21	275.361	1.21	25.083	1.21	88.2217	1.21	45.3057	1.21	328.972	1.21	603.278	1.21	742.973		1053	340	625	7082	3390	1189
1.22	9.22266	1.22	65.833	1.22	151.473	1.22	253.723	1.22	202.62	1.22	446.556	1.22	-17.4443	1.22	80.8057	1.22	76.416	1.22	347.028	1.22	539.944	1.22	698.556		820	317	638	5757	2925	1268
1.23	7.58301	1.23	100.306	1.23	179.277	1.23	218.056	1.23	140.2	1.23	454.806	1.23	-13.667	1.23	121.417	1.23	96.3057	1.23	353.027	1.23	540.806	1.23	647		1081	202	547	11009	4817	1103
1.24	-3.13965	1.24	146.417	1.24	133.583	1.24	312.056	1.24	27.8799	1.24	421.277	1.24	-31	1.24	114.223	1.24	49.7217	1.24	371.889	1.24	608.584	1.24	639.083		936	197	371	8527	1649	917
1.25	19.5557	1.25	157.944	1.25	110.056	1.25	359.277	1.25	68.3926	1.25	418.306	1.25	-63.5283	1.25	196.944	1.25	125.25	1.25	405.361	1.25	668.723	1.25	705.194		1842	254	805	17026	1834	784
1.26	87.417	1.26	92.8613	1.26	103.167	1.26	393.777	1.26	181.38	1.26	369.194	1.26	-58.6943	1.26	229.39	1.26	60.6113	1.26	422.417	1.26	702.583	1.26	784.667		1599	411	408	6120	4299	3333
1.27	135	1.27	43.6103	1.27	105.583	1.27	316.556	1.27	260.107	1.27	330.416	1.27	-114.556	1.27	240.861	1.27	8.55566	1.27	462.333	1.27	714.556	1.27	737.917		1013	172	682	12895	2390	781
1.28	185.306	1.28	89	1.28	36.6943	1.28	328.277	1.28	270.019	1.28	212.889	1.28	-78.9727	1.28	197.75	1.28	4.72266	1.28	465.028	1.28	745.917	1.28	723.361		1101	172	356	7737	2262	826
1.29	98.25	1.29	129.64	1.29	4.47266	1.29	280.056	1.29	186.753	1.29	249.361	1.29	-36.5	1.29	184.389	1.29	4.13867	1.29	446.861	1.29	730.417	1.29	706.334		699	235	871	11799	1809	692
1.3	94.3887	1.3	77.8057	1.3	27.5283	1.3	360.389	1.3	186.314	1.3	255.556	1.3	1.86035	1.3	271.75	1.3	36.8887	1.3	327.083	1.3	685.056	1.3	718.889		1661	587	405	9028	2077	891
1.31	201.972	1.31	36.7217	1.31	82.8057	1.31	375.5	1.31	172.648	1.31	290.25	1.31	-34.5557	1.31	237.611	1.31	121.444	1.31	297.389	1.31	703.167	1.31	684.639		897	233	646	12944	3786	1455
1.32	312.167	1.32	30	1.32	66.0273	1.32	366.86	1.32	149.827	1.32	336.056	1.32	-38.917	1.32	165.861	1.32	131.86	1.32	710.111	1.32	796.14	1.32	648.806		1269	210	322	4488	1444	817
1.33	265.583	1.33	42.1943	1.33	-38.1387	1.33	279.39	1.33	120.407	1.33	335.889	1.33	-14.9717	1.33	158.889	1.33	127.64	1.33	735.139	1.33	850.111	1.33	640.473		904	203	692	6295	3610	930
1.34	171.778	1.34	70.6387	1.34	-98.1103	1.34	273.583	1.34	156.46	1.34	380.833	1.34	15.6387	1.34	208.861	1.34	115.944	1.34	756.667	1.34	838.694	1.34	636.806		1297	224	632	12522	3064	802
1.35	190.583	1.35	107.333	1.35	-102.916	1.35	222.583	1.35	171.773	1.35	428.777	1.35	19.75	1.35	239.583	1.35	100.556	1.35	752.056	1.35	857.389	1.35	673.167		1271	232	378	7710	3240	693
1.36	270.056	1.36	166.833	1.36	-76.0557	1.36	241.611	1.36	239.04	1.36	417	1.36	3.22266	1.36	241.611	1.36	134.667	1.36	725.277	1.36	924.083	1.36	780.834		904	1111	460	11423	1957	1146
1.37	367.25	1.37	179.861	1.37	-63.1103	1.37	267.167	1.37	234.893	1.37	407.167	1.37	28.2227	1.37	258.861	1.37	164.416	1.37	875.917	1.37	949.14	1.37	869.222		1398	172	610	12753	2701	632
1.38	316.583	1.38	150.5	1.38	-14.3887	1.38	232.028	1.38	100.46	1.38	450.389	1.38	12.6387	1.38	215	1.38	201.444	1.38	953.527	1.38	982.64	1.38	942.64		681	170	457	12722	6842	1509
1.39	243.222	1.39	115.361	1.39	-17.2227	1.39	170.64	1.39	26.2871	1.39	418.944	1.39	-43.9717	1.39	191.027	1.39	186.444	1.39	1005.42	1.39	1051.36	1.39	937.667		670	252	491	6235	4835	583
1.4	291.417	1.4	149	1.4	6.5	1.4	324.666	1.4	127.34	1.4	409.139	1.4	25.417	1.4	141.028	1.4	150.806	1.4	1072.14	1.4	1101.64	1.4	997.027		744	173	636	5675	2307	1064
1.41	261.277	1.41	189.861	1.41	-44.417	1.41	417.666	1.41	131.981	1.41	471.139	1.41	11.6104	1.41	146.167	1.41	124.223	1.41	1236.81	1.41	1192.56	1.41	1095.78		693	263	392	8548	2148	640
1.42	267.944	1.42	181.584	1.42	-92.25	1.42	410.916	1.42	83.3672	1.42	404.75	1.42	-5.61133	1.42	124.334	1.42	178.472	1.42	1363.64	1.42	1277.92	1.42	1204.86		1046	558	395	6912	1278	1304
1.43	243.861	1.43	142.444	1.43	-80.333	1.43	349.611	1.43	41.4268	1.43	396.584	1.43	23.333	1.43	104.75	1.43	212.611	1.43	1586.92	1.43	1416.33	1.43	1222.5		1736	324	580	14483	2714	1618
1.44	210.5	1.44	172.139	1.44	-20.3887	1.44	366.333	1.44	118.814	1.44	375.889	1.44	12.1387	1.44	122.834	1.44	232.278	1.44	1867.83	1.44	1584.44	1.44	1282.75		811	291	364	7523	2645	792
1.45	170.361	1.45	156.778	1.45	21.25	1.45	237.083	1.45	195.64	1.45	358.722	1.45	-9.58301	1.45	161.889	1.45	192.639	1.45	2151.97	1.45	1722.53	1.45	1382.61		743	354	530	5336	1668	937
1.46	255.334	1.46	91.3057	1.46	40.9443	1.46	316.416	1.46	181.24	1.46	334.75	1.46	60.7217	1.46	137.277	1.46	179.25	1.46	2357.28	1.46	1884.11	1.46	1488.61		1100	291	486	7968	2128	1604
1.47	223.694	1.47	39.8057	1.47	23.4717	1.47	262.167	1.47	95.5127	1.47	350.833	1.47	27.0557	1.47	135.25	1.47	156.306	1.47	2759.42	1.47	2112.89	1.47	1556.36		1016	236	311	11734	2087	660
1.48	170	1.48	48.1113	1.48	39.6943	1.48	241.667	1.48	58.4326	1.48	373.833	1.48	0.75	1.48	143.639	1.48	140.917	1.48	3229.28	1.48	2432.11	1.48	1710.83		1507	278	592	3937	4884	672
1.49	192.028	1.49	4.05566	1.49	84.0273	1.49	279.973	1.49	16.9268	1.49	326.334	1.49	47.667	1.49	136.473	1.49	173.694	1.49	3875.61	1.49	2782.06	1.49	1837.75		746	198	354	6174	1777	1219
1.5	87.8057	1.5	-5.63867	1.5	82	1.5	384.278	1.5	63.1074	1.5	273.722	1.5	11.9717	1.5	156.833	1.5	111.416	1.5	4478.64	1.5	3268	1.5	2077.53		1740	182	389	6972	1738	1060
1.51	-37.6943	1.51	41.5	1.51	127.25	1.51	364.972	1.51	-15.6602	1.51	259.056	1.51	-6.13867	1.51	137.194	1.51	87.3603	1.51	5193.83	1.51	3808.75	1.51	2358.61		1911	176	501	22022	2808	816
1.52	-24.333	1.52	84.083	1.52	112.444	1.52	387.888	1.52	18.627	1.52	196.223	1.52	27.3057	1.52	112.889	1.52	163.473	1.52	5700.81	1.52	4774.5	1.52	2799.17		709	174	419	5689	3888	1317
1.53	-0.610352	1.53	75.5283	1.53	1.08398	1.53	449.806	1.53	64.0195	1.53	225.556	1.53	6.94434	1.53	63.1113	1.53	170.473	1.53	6304.06	1.53	5227.31	1.53	3299.45		894	281	375	5300	3614	607
1.54	51.3603	1.54	96.8613	1.54	-33.5	1.54	438.861	1.54	37.3672	1.54	240.834	1.54	19.8896	1.54	80.8057	1.54	134.639	1.54	6888.36	1.54	5516.08	1.54	3778.36		664	215	381	10558	1350	999
1.55	68.8887	1.55	109.416	1.55	26.084	1.55	433.916	1.55	63.1934	1.55	221.389	1.55	41.7773	1.55	-140.25	1.55	106.778	1.55	7425.61	1.55	5997.47	1.55	4392.14		890	223	313	15201	1374	1955
1.56	-25.6387	1.56	134.64	1.56	66.1943	1.56	467	1.56	71.4805	1.56	145.723	1.56	99.4727	1.56	-1106.25	1.56	135.722	1.56	7964.25	1.56	6566.72	1.56	4942.78		904	340	649	5620	2760	563
1.57	48.6387	1.57	90.3887	1.57	138.361	1.57	466.501	1.57	-31.0068	1.57	112.5	1.57	53.2227	1.57	107.972	1.57	194.973	1.57	8562.86	1.57	7149.81	1.57	5489.89		896	164	494	6133	1599	567
1.58	81.833	1.58	111.444	1.58	177.417	1.58	512.972	1.58	-82.1533	1.58	122.527	1.58	-112.416	1.58	96.8057	1.58	157.39	1.58	9021.83	1.58	7669.42	1.58	6141.75		1115	234	710	4378	2637	1340
1.59	80.1103	1.59	132.916	1.59	204.806	1.59	444.444	1.59	-109.22	1.59	210.5	1.59	-84.8887	1.59	68.75	1.59	255.306	1.59	9564.58	1.59	8187.33	1.59	6709.86		805	178	381	4522	2297	978
1.6	-3.97168	1.6	58.4717	1.6	185.556	1.6	437.417	1.6	-40.0674	1.6	228.583	1.6	-28.0293	1.6	-11.3604	1.6	307.75	1.6	9985.69	1.6	8647.11	1.6	7306.08		1819	235	458	16774	3397	2055
1.61	-178.889	1.61	66.1113	1.61	205.306	1.61	368.862	1.61	-17.3604	1.61	210.556	1.61	-19.4727	1.61	-71.75	1.61	281.389	1.61	10401.1	1.61	9061.5	1.61	7986.86		933	350	366	5678	5209	621
1.62	-13.5557	1.62	230.917	1.62	100.166	1.62	372	1.62	-32.793	1.62	255.25	1.62	68.8887	1.62	-144.084	1.62	297.806	1.62	10579.9	1.62	9580.56	1.62	8335.03		947	476	796	7262	2084	929
1.63	100.25	1.63	340.167	1.63	-166.306	1.63	334.084	1.63	-62.0732	1.63	258.944	1.63	73.1387	1.63	-177.833	1.63	289.139	1.63	10525.4	1.63	10069.6	1.63	8736.69		720	203	550	6450	2422	773
1.64	35.1387	1.64	224.333	1.64	-272.111	1.64	466.473	1.64	-11.7598	1.64	202.417	1.64	65.6387	1.64	-211.694	1.64	244.444	1.64	10364.6	1.64	10396.9	1.64	9369.39		778	169	297	4307	2773	786
1.65	-37.917	1.65	63.25	1.65	-5.11035	1.65	554.777	1.65	42.0996	1.65	207.027	1.65	-74.1387	1.65	-228.889	1.65	206.778	1.65	10075.7	1.65	10604	1.65	9806.53		681	171	414	4213	1915	713
1.66	-84.416	1.66	32.25	1.66	245.334	1.66	643.5	1.66	39.4131	1.66	217.11	1.66	-96.8047	1.66	-198.361	1.66	227.444	1.66	9587.86	1.66	10624.3	1.66	10209.8		912	256	693	10445	3763	923
1.67	28.75	1.67	37.583	1.67	398.667	1.67	583.084	1.67	42.2529	1.67	198.389	1.67	-142.473	1.67	-171.777	1.67	234.083	1.67	8938.83	1.67	10363	1.67	10548.6		828	295	305	9472	1998	954
1.68	66.8603	1.68	34.9443	1.68	601.916	1.68	583.972	1.68	64.5596	1.68	150.334	1.68	-130	1.68	-176.39	1.68	246.277	1.68	8385.08	1.68	9980.28	1.68	10757.8		871	275	404	10648	2116	627
1.69	-22.7217	1.69	62.6943	1.69	909.223	1.69	456.75	1.69	8.59961	1.69	108.723	1.69	-92.3613	1.69	-164.556	1.69	247.194	1.69	7868.97	1.69	9586.86	1.69	10558.5		1524	260	301	4826	3489	768
1.7	-49.4727	1.7	60.6103	1.7	1086.75	1.7	449.416	1.7	-34.0928	1.7	66.9717	1.7	-69.0566	1.7	-100.111	1.7	259.194	1.7	7277.22	1.7	9111.69	1.7	10214.2		858	211	385	9671	1964	897
1.71	52.333	1.71	13.3613	1.71	1161.42	1.71	487.861	1.71	-90.6201	1.71	86.3057	1.71	51.7773	1.71	-105.194	1.71	303.277	1.71	6803.42	1.71	8621.39	1.71	9760.28		804	219	682	9678	1775	1986
1.72	65.2217	1.72	35.833	1.72	1011.47	1.72	624.945	1.72	-52.8272	1.72	76.167	1.72	7.88867	1.72	-92.334	1.72	339.444	1.72	6274.72	1.72	8190.08	1.72	9267.92		1282	1035	309	8062	3293	1606
1.73	19.3057	1.73	10.917	1.73	1069.03	1.73	582.945	1.73	-13.7529	1.73	57.166	1.73	-32.2773	1.73	-91.1387	1.73	375.028	1.73	5719.31	1.73	7758.86	1.73	8764.78		1120	254	396	5501	4195	785
1.74	-16.7227	1.74	-43.5	1.74	1359.11	1.74	555.084	1.74	-20.6865	1.74	40.667	1.74	-137.084	1.74	-68.4717	1.74	380.944	1.74	5187.92	1.74	7359.33	1.74	8238.86		734	309	541	4436	3751	757
1.75	123.417	1.75	9.66699	1.75	1517.69	1.75	540.666	1.75	-67.9473	1.75	17.583	1.75	-169.195	1.75	64.0557	1.75	420.944	1.75	4690.28	1.75	6934	1.75	7794.56		821	189	427	6375	3511	574
1.76	167.806	1.76	50.1113	1.76	1620.5	1.76	545.416	1.76	8.24023	1.76	83.333	1.76	-60.668	1.76	127.556	1.76	395.306	1.76	4257.75	1.76	6517.42	1.76	7162.06		855	254	317	4811	3584	699
1.77	121.444	1.77	86.75	1.77	1763.44	1.77	538.529	1.77	67.0928	1.77	59.9727	1.77	51.25	1.77	140.917	1.77	292.556	1.77	3771.72	1.77	5976.39	1.77	6387.42		824	182	439	7154	1997	574
1.78	81.417	1.78	206.416	1.78	1755.03	1.78	621.307	1.78	58.4668	1.78	74.8603	1.78	93.3887	1.78	229.277	1.78	372.223	1.78	3331.78	1.78	5496.22	1.78	5662.25		836	228	777	4618	1474	2818
1.79	36.1397	1.79	325.916	1.79	1505.31	1.79	642.973	1.79	-67.0273	1.79	21.1104	1.79	286.305	1.79	365.75	1.79	459.14	1.79	2999.19	1.79	5050.33	1.79	5401.36		993	192	659	8956	2304	1649
1.8	-8.55566	1.8	370.166	1.8	1288.03	1.8	655.25	1.8	-95.0068	1.8	48.5	1.8	369.084	1.8	652.723	1.8	549.64	1.8	2585.08	1.8	4585.97	1.8	4910.14		870	221	388	17308	1514	960
1.81	14.0557	1.81	322.139	1.81	1184.61	1.81	415.723	1.81	-47.0801	1.81	108.334	1.81	609.666	1.81	1192.83	1.81	641.777	1.81	2223.25	1.81	4079.42	1.81	4412.36		1508	299	718	4077	2414	1329
1.82	-39.5	1.82	316.611	1.82	1021.33	1.82	338.805	1.82	34.9873	1.82	62.0283	1.82	1018.67	1.82	1819.69	1.82	647.89	1.82	1895.61	1.82	3671.22	1.82	4108.28		663	189	311	4160	3008	663
1.83	-20.3896	1.83	320.25	1.83	885.194	1.83	368.723	1.83	84.1074	1.83	8.38867	1.83	1650.31	1.83	2339.94	1.83	395.5	1.83	1636.03	1.83	3259.11	1.83	3712.92		954	165	348	9972	1755	1786
1.84	-54.8057	1.84	294.583	1.84	820.11	1.84	393.084	1.84	190.66	1.84	87.4443	1.84	2204.39	1.84	2982.14	1.84	634.472	1.84	1404.53	1.84	2960.36	1.84	3241.31		781	173	461	8775	1467	892
1.85	31.5	1.85	365.777	1.85	760.722	1.85	486.861	1.85	225.553	1.85	235.028	1.85	2493.7	1.85	3352.7	1.85	1099.03	1.85	1158.89	1.85	2582.42	1.85	2642.08		804	210	363	3704	5054	613
1.86	203.39	1.86	451.5	1.86	681.444	1.86	596.221	1.86	279.974	1.86	264.416	1.86	2670.33	1.86	3553.95	1.86	1776.61	1.86	894.389	1.86	2334.44	1.86	2393.17		808	312	577	5293	2574	934
1.87	313.333	1.87	383.167	1.87	489.584	1.87	645.527	1.87	312.968	1.87	280.194	1.87	3096.61	1.87	3772.56	1.87	2446.5	1.87	718.168	1.87	1993.42	1.87	2313.19		853	209	386	8910	4604	711
1.88	141.834	1.88	398.528	1.88	390.861	1.88	732.027	1.88	258.56	1.88	352.333	1.88	3536.06	1.88	4129.61	1.88	2919.64	1.88	644.111	1.88	1770.5	1.88	2059.83		1027	180	491	3757	1741	1289
1.89	-280.222	1.89	254.556	1.89	403.278	1.89	747.334	1.89	222.413	1.89	269	1.89	4036.05	1.89	4606.28	1.89	3160.7	1.89	541.307	1.89	1579.86	1.89	1918.92		901	252	463	12365	2439	848
1.9	-464.722	1.9	178.527	1.9	459.806	1.9	725.555	1.9	261.221	1.9	223.583	1.9	4877.53	1.9	5710.08	1.9	3194.11	1.9	464.777	1.9	1439.19	1.9	1671.25		676	447	455	4697	6932	632
1.91	-431.111	1.91	109.027	1.91	324.11	1.91	595.639	1.91	140.4	1.91	316.278	1.91	6124.42	1.91	6952.5	1.91	3562.5	1.91	351.305	1.91	1336.44	1.91	1378.25		849	216	657	8572	1524	2255
1.92	-236.084	1.92	130.277	1.92	375.278	1.92	675.445	1.92	113.032	1.92	445.11	1.92	7651.78	1.92	8629.39	1.92	3846.39	1.92	189.361	1.92	1254.94	1.92	1034.03		2035	428	325	12245	4468	1369
1.93	-41.2773	1.93	190.167	1.93	544.083	1.93	748.279	1.93	144.221	1.93	394	1.93	9599.33	1.93	10571.7	1.93	4568.64	1.93	89.9434	1.93	1105.61	1.93	890.722		1051	169	453	4627	4305	567
1.94	-30.3887	1.94	246.723	1.94	748.583	1.94	818.527	1.94	248.214	1.94	372	1.94	11607.6	1.94	12797.1	1.94	5448.06	1.94	69.9727	1.94	1041.25	1.94	1269.86		915	228	489	12998	1327	2300
1.95	-135.223	1.95	228.361	1.95	771.861	1.95	858.361	1.95	274.685	1.95	388.889	1.95	13802.4	1.95	14858	1.95	6636.28	1.95	-80.7773	1.95	941.444	1.95	1089.58		1358	349	335	5875	1910	2434
1.96	-176.389	1.96	181.5	1.96	729.14	1.96	1049.08	1.96	386.215	1.96	428.027	1.96	16032	1.96	16767.7	1.96	8212.03	1.96	-203.611	1.96	830.306	1.96	965.722		735	384	357	9859	2943	678
1.97	-118.89	1.97	49.7773	1.97	585.167	1.97	1144	1.97	447.246	1.97	449.86	1.97	18125.2	1.97	18332.3	1.97	10192	1.97	-355.193	1.97	734.473	1.97	915.472		688	289	338	6739	1450	617
1.98	-100.444	1.98	-13.334	1.98	467.25	1.98	1304.28	1.98	582.014	1.98	497.278	1.98	19566	1.98	19239.4	1.98	12117.3	1.98	-469.805	1.98	636.36	1.98	891.528		714	511	832	6310	4190	2025
1.99	-107.056	1.99	204.223	1.99	410.417	1.99	1446.33	1.99	783.381	1.99	517.056	1.99	20215	1.99	19389.1	1.99	14078.1	1.99	-558.555	1.99	602.194	1.99	804.361		775	171	641	14584	1920	700
2	-96.6943	2	368.972	2	173.833	2	1571.67	2	946.594	2	606.084	2	19936.8	2	18672.1	2	15798.6	2	-571.916	2	574.527	2	742.694		743	163	610	6279	1501	1504
2.01	94.8057	2.01	461.528	2.01	7.02734	2.01	1717.42	2.01	955.135	2.01	686.417	2.01	19073.8	2.01	17201.3	2.01	16991.3	2.01	-616.666	2.01	525.556	2.01	659.667		727	169	402	13629	3038	992
2.02	137.083	2.02	440.806	2.02	-50.7783	2.02	1864.86	2.02	920.354	2.02	791.973	2.02	17406.4	2.02	15008	2.02	17773.8	2.02	-565.916	2.02	439.944	2.02	470.361		768	556	513	5050	4368	586
2.03	77.2773	2.03	364.222	2.03	-56.3887	2.03	2169.86	2.03	987.381	2.03	925.61	2.03	15459.4	2.03	12601	2.03	17990.4	2.03	-493.639	2.03	423.611	2.03	336.861		1816	264	609	5543	1822	1003
2.04	77.917	2.04	300.972	2.04	51.75	2.04	2651.25	2.04	1146.17	2.04	942.056	2.04	13079.3	2.04	10262.5	2.04	17337.6	2.04	-509.223	2.04	424.694	2.04	312.61		730	248	956	5092	3440	611
2.05	99.8057	2.05	305.138	2.05	105.89	2.05	3446.53	2.05	1425.98	2.05	1001.72	2.05	10801.7	2.05	8008.22	2.05	16072.1	2.05	-442.082	2.05	391.806	2.05	93.5273		672	232	717	7151	1459	746
2.06	-98.7773	2.06	353.416	2.06	149.083	2.06	5134.89	2.06	2113.11	2.06	1119.67	2.06	8670.53	2.06	6061.89	2.06	14290.6	2.06	-361.057	2.06	408.75	2.06	-8.44434		672	355	566	4151	1474	663
2.07	-314.5	2.07	296.334	2.07	187.86	2.07	7712.08	2.07	3277.61	2.07	1184.69	2.07	6888.97	2.07	4389.64	2.07	12342.8	2.07	-310.832	2.07	429.611	2.07	275.611		1667	325	332	5147	3048	723
2.08	-290.027	2.08	-32.9453	2.08	221.667	2.08	10462.3	2.08	5254.25	2.08	1403.47	2.08	5489.19	2.08	3213.78	2.08	10046.5	2.08	-264.611	2.08	349.5	2.08	466.973		1016	180	332	4432	1309	1651
2.09	-330.39	2.09	-276.166	2.09	322.584	2.09	12928.4	2.09	7967.22	2.09	1786.28	2.09	4118.69	2.09	2464.19	2.09	7925.72	2.09	-181.971	2.09	280.473	2.09	528.723		810	160	495	16803	1343	1217
2.1	-293.361	2.1	-95.8057	2.1	401.444	2.1	15203.9	2.1	10361.5	2.1	2662.03	2.1	2974.14	2.1	1893.36	2.1	6092.03	2.1	-183.611	2.1	314	2.1	463.277		784	313	370	3856	1484	929
2.11	-393.027	2.11	10.084	2.11	442.555	2.11	17085.5	2.11	12314.4	2.11	4060.14	2.11	2103.8	2.11	1438.67	2.11	4510.72	2.11	-172.582	2.11	295.527	2.11	460.444		1811	192	410	5295	1687	582
2.12	-645.139	2.12	26.3613	2.12	425.999	2.12	18631.2	2.12	13866.4	2.12	6058.14	2.12	1548.44	2.12	1153.78	2.12	3242.03	2.12	-176.611	2.12	254.973	2.12	450		927	160	512	10396	1356	670
2.13	171.027	2.13	69.333	2.13	523.667	2.13	20005.7	2.13	14992.8	2.13	8450.11	2.13	1157.28	2.13	906.277	2.13	2204.89	2.13	-176.611	2.13	276.056	2.13	450.166		703	186	536	4373	2917	998
2.14	435.944	2.14	24.583	2.14	423.25	2.14	21159.3	2.14	15924.1	2.14	10817.3	2.14	778.168	2.14	746.778	2.14	1837.72	2.14	-159.193	2.14	334.444	2.14	482.5		912	256	343	6631	2590	641
2.15	889.473	2.15	31	2.15	291.278	2.15	22175.3	2.15	16376.7	2.15	12571.5	2.15	632.861	2.15	680.028	2.15	1445.89	2.15	-149.111	2.15	366.139	2.15	412		806	239	377	13762	5177	678
2.16	1142.97	2.16	54.7227	2.16	118.416	2.16	22986.2	2.16	16651.3	2.16	13982.9	2.16	517.279	2.16	742.89	2.16	1164.69	2.16	-213.805	2.16	363.584	2.16	369.666		733	235	1256	8246	1793	735
2.17	1409.31	2.17	95.7773	2.17	-29.4727	2.17	23295.3	2.17	17164.7	2.17	14995.2	2.17	423.334	2.17	655.612	2.17	969.889	2.17	-172.584	2.17	337.528	2.17	394.083		749	238	1015	4798	1740	564
2.18	1440.83	2.18	139.389	2.18	-59.0557	2.18	23520.8	2.18	17651.1	2.18	15657	2.18	253.582	2.18	559.695	2.18	745.167	2.18	-212.084	2.18	261.75	2.18	480.917		721	650	1500	4120	2215	688
2.19	1393.08	2.19	159	2.19	-21.5273	2.19	23234	2.19	17679.5	2.19	16149.6	2.19	141.971	2.19	620.112	2.19	698.306	2.19	-199.305	2.19	183.584	2.19	471.083		689	161	691	13457	3225	649
2.2	1309.11	2.2	215.861	2.2	-72.5	2.2	22561.2	2.2	17558.8	2.2	16470.5	2.2	48.416	2.2	654.917	2.2	714.222	2.2	-147.445	2.2	136.5	2.2	489.083		683	197	509	7289	2036	2506
2.21	1224.72	2.21	199.778	2.21	-46.2217	2.21	21488	2.21	17176.9	2.21	16804.4	2.21	-86.3613	2.21	607.638	2.21	733.916	2.21	-123.111	2.21	65.3057	2.21	450.39		1832	352	490	5729	1505	585
2.22	1072.97	2.22	161.833	2.22	46.1397	2.22	20199.1	2.22	16510.3	2.22	16934.3	2.22	-132.055	2.22	582.25	2.22	677.778	2.22	-156.861	2.22	18.8613	2.22	440.111		1085	208	392	3921	2215	812
2.23	983.694	2.23	-2.52832	2.23	78.4717	2.23	18557.8	2.23	15661.1	2.23	16886.5	2.23	-13.6934	2.23	501.972	2.23	582.501	2.23	-109.861	2.23	-44.666	2.23	363.056		715	247	372	6825	4738	924
2.24	762.223	2.24	-21.4707	2.24	65.1387	2.24	16554.8	2.24	14595.8	2.24	16629.3	2.24	-32.3047	2.24	464.972	2.24	454.166	2.24	-50.4727	2.24	-93.2227	2.24	309.75		735	184	343	14649	2478	986
2.25	584.806	2.25	-95.75	2.25	85.8887	2.25	14587.2	2.25	13252.2	2.25	16222.7	2.25	15.166	2.25	445.528	2.25	534.028	2.25	-123.223	2.25	-95.084	2.25	403.86		712	349	410	3853	3144	734
2.26	502.5	2.26	-153.917	2.26	112.639	2.26	12619.9	2.26	11997.6	2.26	15484.7	2.26	49.6387	2.26	413.444	2.26	606.666	2.26	-173	2.26	-106.667	2.26	423.333		1350	576	361	13406	2200	2916
2.27	551.333	2.27	-20.166	2.27	209.973	2.27	10377.5	2.27	10496	2.27	14515.1	2.27	123.25	2.27	334.501	2.27	509.249	2.27	-144.668	2.27	-93.584	2.27	421.778		1254	757	707	6346	2379	1537
2.28	562.555	2.28	309.25	2.28	244.39	2.28	8743.17	2.28	9153.67	2.28	13255.6	2.28	177.555	2.28	239.416	2.28	524.611	2.28	-130.416	2.28	-93.5557	2.28	386.333		904	188	438	4964	3318	763
2.29	499.75	2.29	481.167	2.29	213.861	2.29	7107.97	2.29	7737.51	2.29	12030.5	2.29	263.723	2.29	253.945	2.29	497.723	2.29	-167.195	2.29	-71.25	2.29	358.5		913	195	448	18111	1555	794
2.3	404.223	2.3	478.972	2.3	178.917	2.3	5988.67	2.3	6505.39	2.3	10654.1	2.3	316.084	2.3	258.777	2.3	443.139	2.3	-217.111	2.3	-23.6113	2.3	376.473		706	370	594	7562	1540	1832
2.31	334.305	2.31	393.611	2.31	232.972	2.31	4811.97	2.31	5394.09	2.31	9356.06	2.31	344.166	2.31	251.973	2.31	422.805	2.31	-219.389	2.31	12.5273	2.31	359.723		1398	290	500	3965	4279	1944
2.32	262	2.32	262.056	2.32	226.556	2.32	4019	2.32	4587.44	2.32	8084.92	2.32	291	2.32	253.584	2.32	441.167	2.32	-199.945	2.32	26.2217	2.32	347.611		693	416	454	8897	2201	1650
2.33	267.056	2.33	141.889	2.33	218.416	2.33	3449.3	2.33	3861.28	2.33	6922.53	2.33	391.639	2.33	220.861	2.33	368.806	2.33	-222.25	2.33	64.417	2.33	364.5		1477	161	480	14588	2249	634
2.34	177.944	2.34	153.444	2.34	253.334	2.34	3103	2.34	3362.75	2.34	5764.81	2.34	334.529	2.34	235.36	2.34	303.722	2.34	-230.777	2.34	54.8897	2.34	378.444		1035	842	877	5329	1909	1010
2.35	85.1387	2.35	240.889	2.35	231.527	2.35	2825.33	2.35	2899.94	2.35	4869.72	2.35	305.473	2.35	242.416	2.35	287.362	2.35	-162	2.35	42.3603	2.35	378.416		661	288	601	9038	1418	855
2.36	91.083	2.36	222.027	2.36	202.861	2.36	2667.72	2.36	2599.2	2.36	4250.31	2.36	315.695	2.36	268.749	2.36	270.889	2.36	-192.723	2.36	138.027	2.36	385.084		1074	248	519	8044	3542	1159
2.37	102.361	2.37	285.306	2.37	143.889	2.37	2396.75	2.37	2416.99	2.37	3763.19	2.37	360.695	2.37	201.39	2.37	261.639	2.37	-216.584	2.37	188.139	2.37	409.916		1014	293	423	10526	2571	1788
2.38	114.777	2.38	367.139	2.38	80.3613	2.38	2224.08	2.38	2213.15	2.38	3275.5	2.38	281.5	2.38	201.916	2.38	215.223	2.38	-304.889	2.38	136.723	2.38	432.027		1068	205	504	6409	1360	3098
2.39	81.4443	2.39	319.806	2.39	79.6397	2.39	2026.03	2.39	1810.55	2.39	2992.14	2.39	203.832	2.39	191.277	2.39	248.777	2.39	-451.055	2.39	133.556	2.39	418.889		847	211	414	10702	6233	1570
2.4	112.056	2.4	292.056	2.4	84	2.4	1754.28	2.4	1567.13	2.4	2605.39	2.4	289.832	2.4	261.556	2.4	279.389	2.4	-412	2.4	235.639	2.4	377.139		1180	204	1063	3719	1671	609
2.41	136.722	2.41	259.333	2.41	135.806	2.41	1512	2.41	1289.91	2.41	2438.61	2.41	383.057	2.41	284.167	2.41	219.138	2.41	-365.721	2.41	261.277	2.41	368.917		826	228	315	13147	5143	566
2.42	49.667	2.42	258.194	2.42	97.8057	2.42	1390.22	2.42	1161.83	2.42	2058.97	2.42	359.389	2.42	231.944	2.42	231.056	2.42	-296.305	2.42	206.027	2.42	462.861		1250	162	895	10990	3060	1143
2.43	-0.166992	2.43	261.61	2.43	59.0557	2.43	1189.92	2.43	988.406	2.43	1665.61	2.43	317	2.43	144.805	2.43	217.889	2.43	-357.111	2.43	149.527	2.43	434.027		808	224	584	6908	4166	2447
2.44	-48.6113	2.44	175.194	2.44	18.166	2.44	1029.53	2.44	854.779	2.44	1509.78	2.44	310.639	2.44	122.721	2.44	245.223	2.44	-368.777	2.44	165.111	2.44	405.306		920	397	384	8213	1687	1043
2.45	-30.8613	2.45	120.973	2.45	36.0557	2.45	854.75	2.45	701.779	2.45	1418.11	2.45	351.166	2.45	150.416	2.45	224.001	2.45	-421.307	2.45	236.5	2.45	349.694		893	532	616	3984	2730	685
2.46	-74.0557	2.46	149.11	2.46	81.7217	2.46	921.389	2.46	624.033	2.46	1272.25	2.46	356.166	2.46	243.473	2.46	194.528	2.46	-373.277	2.46	340.778	2.46	357.334		958	215	415	5035	5227	2231
2.47	-47.75	2.47	183	2.47	139.249	2.47	953.75	2.47	526.566	2.47	1046.69	2.47	316.111	2.47	183.639	2.47	88	2.47	-355.529	2.47	301.778	2.47	440.639		715	196	316	19252	1878	735
2.48	-63.417	2.48	148.417	2.48	157.389	2.48	964.277	2.48	436.555	2.48	863.722	2.48	289.611	2.48	145.639	2.48	145.834	2.48	-406.639	2.48	249.222	2.48	450.722		921	209	311	5105	1958	1407
2.49	-96.083	2.49	46.0273	2.49	146.806	2.49	924.805	2.49	374.647	2.49	721.001	2.49	290.693	2.49	150.5	2.49	74.9717	2.49	-390.139	2.49	284.001	2.49	391.11		1087	244	552	9386	1978	1671
2.5	-159.25	2.5	14.9727	2.5	68.2773	2.5	893.221	2.5	337.619	2.5	749.222	2.5	321.75	2.5	142.279	2.5	45.1397	2.5	-386.389	2.5	296.194	2.5	300.806		1030	265	471	8265	1359	1079
2.51	-215.722	2.51	41.6387	2.51	75.8897	2.51	906.334	2.51	276.666	2.51	641.444	2.51	283	2.51	72.3887	2.51	48.501	2.51	-380.805	2.51	287.806	2.51	273.694		1277	209	821	7771	2286	767
2.52	-256.805	2.52	124.861	2.52	129.389	2.52	989.166	2.52	314.426	2.52	589.334	2.52	318.889	2.52	87.0547	2.52	77.0557	2.52	-448.889	2.52	283.556	2.52	250.667		998	185	350	9113	3767	696
2.53	-179.944	2.53	125.056	2.53	95.2217	2.53	840.666	2.53	320.453	2.53	528.611	2.53	303.721	2.53	123.723	2.53	135.583	2.53	-466.389	2.53	274.055	2.53	267.194		663	206	539	10592	1877	1504
2.54	-190.361	2.54	99.3613	2.54	94.4717	2.54	775.334	2.54	303.58	2.54	438.555	2.54	370.529	2.54	71.584	2.54	119.583	2.54	-510.527	2.54	305.306	2.54	284.916		902	271	587	13097	3828	566
2.55	-180.75	2.55	46.8887	2.55	99.8623	2.55	860.307	2.55	320.074	2.55	348.25	2.55	429.193	2.55	47.1953	2.55	222.139	2.55	-532.777	2.55	288	2.55	260.473		1150	186	476	7551	2427	582
2.56	-186.472	2.56	64.6943	2.56	45.4717	2.56	978.084	2.56	328.486	2.56	305.943	2.56	396.861	2.56	50.7773	2.56	262.833	2.56	-481.527	2.56	260.64	2.56	301		1202	161	371	3735	3749	641
2.57	-196.361	2.57	64.083	2.57	55.5	2.57	948.861	2.57	333.613	2.57	242	2.57	411.639	2.57	32.584	2.57	245.722	2.57	-477.555	2.57	312.083	2.57	319.277		685	223	302	8032	2443	596
2.58	-126.806	2.58	-22.9443	2.58	111.749	2.58	1046.86	2.58	370.94	2.58	169.668	2.58	484.943	2.58	99.9727	2.58	198.61	2.58	-508.916	2.58	363.056	2.58	350.527		1125	258	333	11263	2669	748
2.59	-182.056	2.59	-68.3887	2.59	209.361	2.59	1092.64	2.59	383.373	2.59	155.807	2.59	488.723	2.59	151.582	2.59	207.167	2.59	-519.527	2.59	367.195	2.59	332.75		1729	172	567	3934	1337	3076
2.6	-239.75	2.6	33.9443	2.6	209.917	2.6	1153.22	2.6	397.06	2.6	148.057	2.6	501.805	2.6	207.834	2.6	188.944	2.6	-543.139	2.6	325.083	2.6	320.89		1056	271	568	4784	2778	2605
2.61	-178.75	2.61	106.611	2.61	154.806	2.61	1210.53	2.61	390.547	2.61	218.807	2.61	535.945	2.61	95.4453	2.61	198.249	2.61	-558.973	2.61	246.223	2.61	347.889		897	195	625	9242	2233	1299
2.62	-135.361	2.62	139.806	2.62	128.249	2.62	1237.78	2.62	356.953	2.62	154.361	2.62	599.611	2.62	3.41602	2.62	197.139	2.62	-627.723	2.62	274.36	2.62	395.14		1900	187	571	9282	2802	2225
2.63	-218.666	2.63	108.973	2.63	154.028	2.63	1135.78	2.63	262.094	2.63	148.416	2.63	577.945	2.63	137.584	2.63	211.36	2.63	-642.055	2.63	293.583	2.63	364.417		995	927	342	5302	2430	1257
2.64	-188.194	2.64	88.4727	2.64	187.749	2.64	1023.08	2.64	249.914	2.64	108.555	2.64	454.139	2.64	64.6387	2.64	286.889	2.64	-588.445	2.64	298.973	2.64	384.305		695	259	418	9797	2199	695
2.65	-202.61	2.65	64.833	2.65	174.138	2.65	1004.61	2.65	291.215	2.65	118.723	2.65	359.168	2.65	14.4453	2.65	234.362	2.65	-573.195	2.65	269.36	2.65	342.027		806	507	566	7922	7530	601
2.66	-217.667	2.66	49.1943	2.66	107.889	2.66	976.055	2.66	277.894	2.66	150.027	2.66	443.057	2.66	48.25	2.66	241.111	2.66	-529	2.66	239.528	2.66	309.333		1339	362	422	13631	2269	801
2.67	-196.25	2.67	80.916	2.67	99.6113	2.67	939.584	2.67	285.84	2.67	81.0293	2.67	442	2.67	53.7773	2.67	184.361	2.67	-463.334	2.67	270.278	2.67	302.917		786	287	383	10683	3200	596
2.68	-155.973	2.68	123.667	2.68	106.861	2.68	1003.64	2.68	284.025	2.68	57.416	2.68	447.777	2.68	-15.9453	2.68	196	2.68	-532.75	2.68	302.334	2.68	331.806		666	276	314	16943	1381	608
2.69	-120.056	2.69	41.417	2.69	100.082	2.69	871.445	2.69	164.766	2.69	144.668	2.69	404.332	2.69	5.83398	2.69	214.918	2.69	-556.111	2.69	303.417	2.69	244.611		1323	251	396	11888	2019	2184
2.7	-100.39	2.7	10.9443	2.7	75.582	2.7	906.082	2.7	164.307	2.7	191.279	2.7	338.943	2.7	20.9727	2.7	227.555	2.7	-583.027	2.7	288.251	2.7	227.583		1329	592	328	11281	2540	668
2.71	-136.806	2.71	98.2227	2.71	60.1113	2.71	939.057	2.71	186.006	2.71	225.75	2.71	340.5	2.71	3.41602	2.71	127.057	2.71	-528.223	2.71	256.027	2.71	230.333		1292	212	667	6245	3722	2020
2.72	-199.917	2.72	94.916	2.72	70.1953	2.72	859.084	2.72	220.461	2.72	51.1113	2.72	415.307	2.72	-13.9707	2.72	180.916	2.72	-472.223	2.72	235.195	2.72	283.445		947	213	438	13507	2859	566
2.73	-169.973	2.73	6.11035	2.73	126.445	2.73	830.832	2.73	152.795	2.73	-39.5547	2.73	368.834	2.73	15.6387	2.73	194.805	2.73	-462.473	2.73	258.945	2.73	335.89		789	509	517	16939	1704	752
2.74	-192.472	2.74	57.9727	2.74	194.138	2.74	889.084	2.74	106.445	2.74	-186.5	2.74	327.445	2.74	39.668	2.74	172.305	2.74	-495.25	2.74	260.861	2.74	369.333		666	204	675	9811	3837	579
2.75	-137.806	2.75	11.7773	2.75	257.138	2.75	933.916	2.75	79.0254	2.75	-250.582	2.75	249.305	2.75	60.9453	2.75	183.166	2.75	-505.529	2.75	239.973	2.75	299.251		1147	352	348	17533	2502	822
2.76	-213.111	2.76	93.667	2.76	209.639	2.76	982.75	2.76	84.9805	2.76	-132.029	2.76	79.918	2.76	71.8613	2.76	130	2.76	-502.111	2.76	201.75	2.76	285.694		1096	391	576	12262	1493	922
2.77	-134.889	2.77	60.3897	2.77	150.611	2.77	686.027	2.77	62.2949	2.77	-187.666	2.77	130.666	2.77	-5.25	2.77	110.834	2.77	-490.195	2.77	177.584	2.77	345.055		1629	161	321	3880	2652	655
2.78	-40.083	2.78	49.2227	2.78	148.416	2.78	781.471	2.78	94.5137	2.78	-222.418	2.78	99.832	2.78	31.75	2.78	141.193	2.78	-522.361	2.78	155.75	2.78	359.444		1559	194	699	5435	2204	767
2.79	-41.1397	2.79	47.2227	2.79	176.223	2.79	836.889	2.79	64.1465	2.79	-256.611	2.79	101.943	2.79	-10.834	2.79	180.666	2.79	-579.973	2.79	149	2.79	290.972		987	161	619	6231	1325	883
2.8	-150.361	2.8	-27.3887	2.8	158.555	2.8	877.527	2.8	75.0606	2.8	-235.389	2.8	181.666	2.8	24.832	2.8	100.443	2.8	-523.168	2.8	157.277	2.8	352.416		722	194	621	4479	2615	870
2.81	-205.944	2.81	-12.3613	2.81	196.777	2.81	815.805	2.81	137.94	2.81	-289.25	2.81	151.945	2.81	84.3887	2.81	-48.75	2.81	-438.529	2.81	143.305	2.81	353.39		727	246	526	21049	5024	683
2.82	-264.417	2.82	17.4717	2.82	142.943	2.82	865.557	2.82	114.285	2.82	-286.582	2.82	93.8887	2.82	-17.5566	2.82	48.7773	2.82	-459.721	2.82	159.027	2.82	266.972		713	161	467	10079	1288	1357
2.83	-260.61	2.83	-48.7227	2.83	146.832	2.83	879.639	2.83	97.2656	2.83	-263.668	2.83	97.584	2.83	-80.3613	2.83	155.111	2.83	-561.723	2.83	210.723	2.83	219.195		901	386	859	9190	3561	564
2.84	-220.501	2.84	-126.168	2.84	116.611	2.84	952.027	2.84	185.174	2.84	-291.916	2.84	86.6387	2.84	-91.25	2.84	140.139	2.84	-665.277	2.84	182.334	2.84	294.138		949	371	596	8098	3718	866
2.85	-250.417	2.85	-75.7773	2.85	101.805	2.85	967.445	2.85	109.141	2.85	-238.805	2.85	53.1113	2.85	-89.3613	2.85	-36.2227	2.85	-525.277	2.85	158.027	2.85	371.417		951	168	361	8903	6053	1766
2.86	-338.057	2.86	-72.0293	2.86	114.221	2.86	987.527	2.86	56.7656	2.86	-307.5	2.86	94.8613	2.86	-102.611	2.86	43.2773	2.86	-395.666	2.86	173.223	2.86	362.222		1211	267	945	10841	3839	685
2.87	-219.861	2.87	-56.3066	2.87	163.945	2.87	922.277	2.87	131.746	2.87	-302.277	2.87	155.834	2.87	-122.916	2.87	46.25	2.87	-368.943	2.87	193.223	2.87	236.166		1030	246	298	4830	1365	1287
2.88	-150.333	2.88	47.75	2.88	122.611	2.88	915.973	2.88	143.44	2.88	-316.5	2.88	49.1387	2.88	-83.1113	2.88	5.0293	2.88	-464.555	2.88	222.305	2.88	200.832		924	227	427	6971	1303	1815
2.89	-194.89	2.89	68.416	2.89	133.807	2.89	1015.05	2.89	186.894	2.89	-271.666	2.89	106.195	2.89	-127.027	2.89	-89.2773	2.89	-508.277	2.89	269.861	2.89	122.084		1239	196	746	16493	1342	596
2.9	-173.89	2.9	53.3066	2.9	149.695	2.9	1109.72	2.9	196.815	2.9	-255.75	2.9	16.6387	2.9	-163.527	2.9	-71.168	2.9	-420.861	2.9	267.279	2.9	151.668		763	297	595	5448	4448	1942
2.91	-116.222	2.91	65.5557	2.91	100.139	2.91	1199.03	2.91	247.414	2.91	-218.168	2.91	60.1953	2.91	-190.055	2.91	-5.94336	2.91	-367.777	2.91	231.805	2.91	153.555		674	176	747	13396	1548	797
2.92	-148.278	2.92	124.333	2.92	-36.6953	2.92	1330.14	2.92	315.986	2.92	-232.861	2.92	88.8613	2.92	-166.861	2.92	30.25	2.92	-473.223	2.92	220.223	2.92	79		1513	172	457	19110	1351	1098
2.93	-195.39	2.93	86.3897	2.93	17	2.93	1397.86	2.93	321.215	2.93	-168.639	2.93	167.168	2.93	-219.25	2.93	-110.639	2.93	-428.277	2.93	205.889	2.93	39		1020	209	452	7924	4536	1023
2.94	-190.251	2.94	4.94336	2.94	-21.7793	2.94	1422.69	2.94	326.773	2.94	-72.6113	2.94	178.973	2.94	-211.166	2.94	-558.529	2.94	-400.166	2.94	211.639	2.94	43.416		1115	172	428	11818	1904	593
2.95	-217.917	2.95	57.6953	2.95	-24.0293	2.95	1243.81	2.95	221.994	2.95	-64.3613	2.95	95.7207	2.95	-231.5	2.95	-109.75	2.95	-433.139	2.95	283.666	2.95	94.5293		677	192	361	7203	3809	1301
2.96	-200.057	2.96	76.5	2.96	49.8613	2.96	1293.17	2.96	122.006	2.96	-108.75	2.96	51.418	2.96	-389.195	2.96	-2.19531	2.96	-554.943	2.96	299.666	2.96	232.527		1223	437	311	7623	1525	630
2.97	-168.611	2.97	-34.1934	2.97	36.1953	2.97	1236.81	2.97	104.014	2.97	-161.168	2.97	13.9453	2.97	-345.639	2.97	40.334	2.97	-515.195	2.97	241.223	2.97	222.39		991	524	611	10836	3163	1704
2.98	-92.9434	2.98	-97.584	2.98	-125.667	2.98	1143.67	2.98	80.9199	2.98	-178.193	2.98	59.2773	2.98	-304.918	2.98	74.5293	2.98	-521.916	2.98	210.805	2.98	228.75		1010	690	505	8868	4584	827
2.99	-95.8047	2.99	-68.8047	2.99	-166.473	2.99	1061.67	2.99	21.834	2.99	-121.75	2.99	-29.5273	2.99	-316.055	2.99	127.139	2.99	-474.973	2.99	306.639	2.99	250.083		926	281	525	7245	2123	847
3	-131.082	3	-28.1934	3	-142.194	3	1122.69	3	22.2148	3	-141.832	3	-89.5273	3	-332.666	3	76.8887	3	-434.971	3	309.057	3	333.639		707	454	517	14715	3887	1133
3.01	-76.584	3.01	-86.5	3.01	-202.111	3.01	1174.06	3.01	50.4668	3.01	-121.807	3.01	-45.8047	3.01	-419.861	3.01	91.3066	3.01	-478.639	3.01	293.361	3.01	247.834		965	475	513	12275	2013	953
3.02	-197.583	3.02	-204.443	3.02	-246.749	3.02	1165.92	3.02	-0.185547	3.02	-70.2207	3.02	-55.7207	3.02	-484.166	3.02	67.3887	3.02	-462.027	3.02	368.473	3.02	197.75		1258	920	361	10753	3405	1281
3.03	-328.223	3.03	-148.416	3.03	-259.251	3.03	1071.08	3.03	26.1797	3.03	-14.3613	3.03	-46.6113	3.03	-531.25	3.03	44.6113	3.03	-346.277	3.03	417.334	3.03	148.418		784	311	423	5221	9346	615
3.04	-363.167	3.04	-125.307	3.04	-290.084	3.04	1022.83	3.04	71.5938	3.04	-32.25	3.04	-40.8613	3.04	-461.279	3.04	137	3.04	-378.916	3.04	363.416	3.04	180.332		852	316	419	8085	2229	564
3.05	-254.889	3.05	-92.7227	3.05	-361.25	3.05	979.834	3.05	70.7402	3.05	-20.4727	3.05	-54.582	3.05	-386.25	3.05	223.777	3.05	-408.055	3.05	374.443	3.05	247.889		785	171	814	5556	1580	1423
3.06	-73.8613	3.06	-124.973	3.06	-466.443	3.06	980.889	3.06	89.9004	3.06	-80.8047	3.06	-87.168	3.06	-344.445	3.06	214.666	3.06	-308.361	3.06	443.389	3.06	336.028		763	315	390	5395	1748	798
3.07	21.0557	3.07	-39.168	3.07	-488.139	3.07	1003.36	3.07	130.326	3.07	-59	3.07	-74.7793	3.07	-267.639	3.07	184.416	3.07	-322.195	3.07	466.473	3.07	418.056		1061	478	373	18061	1410	1026
3.08	76.4443	3.08	51.8887	3.08	-452.389	3.08	1017.8	3.08	137.434	3.08	-49.168	3.08	-58.5273	3.08	-210.75	3.08	133.389	3.08	-343.416	3.08	447.057	3.08	441.944		1546	180	519	6755	1897	2747
3.09	62.667	3.09	53.3047	3.09	-485.057	3.09	1024	3.09	122.34	3.09	-44.6113	3.09	-29.9434	3.09	-199.277	3.09	27.3887	3.09	-289.695	3.09	411.027	3.09	359.444		997	355	715	7008	3138	1733
3.1	80.8897	3.1	45.5293	3.1	-551.334	3.1	986.666	3.1	130.373	3.1	-30.2227	3.1	-79.6113	3.1	-133.389	3.1	25.4434	3.1	-292.639	3.1	379.611	3.1	385.333		798	373	313	5095	1385	1250
3.11	117.388	3.11	68.25	3.11	-503.417	3.11	981.666	3.11	160.033	3.11	-215.584	3.11	-48.2773	3.11	-93.3613	3.11	8.55469	3.11	-284.973	3.11	430.389	3.11	480.166		663	248	1310	13067	1703	1149
3.12	72.6123	3.12	166.778	3.12	-526.277	3.12	1060.81	3.12	292.647	3.12	-149.166	3.12	-42.6113	3.12	-67	3.12	-6.30469	3.12	-297.166	3.12	471.832	3.12	584.194		1158	180	436	20412	10807	643
3.13	51.834	3.13	171.555	3.13	-481.973	3.13	1098.69	3.13	223.461	3.13	-78.2793	3.13	-30.6953	3.13	-81.084	3.13	9.4707	3.13	-303.111	3.13	386.361	3.13	533.611		896	428	380	7657	1426	743
3.14	107.584	3.14	138.166	3.14	-308.666	3.14	1170.19	3.14	175.766	3.14	-56.3047	3.14	-26.3887	3.14	6.83398	3.14	-19.5293	3.14	-267.277	3.14	309.361	3.14	573.89		995	231	306	12011	2264	898
3.15	107.918	3.15	82.083	3.15	-170.277	3.15	1068.44	3.15	159.613	3.15	89.3613	3.15	-66.6113	3.15	-28.8066	3.15	-69.0547	3.15	-258.5	3.15	239	3.15	546.584		1713	167	488	12785	3418	1773
3.16	146.251	3.16	49.1953	3.16	-53.9727	3.16	1126.47	3.16	157.641	3.16	52.2773	3.16	24.3047	3.16	27.2773	3.16	-193.168	3.16	-242.611	3.16	147.779	3.16	551.417		981	192	677	3704	1481	620
3.17	116.639	3.17	186.972	3.17	68.833	3.17	1021	3.17	120.58	3.17	103.527	3.17	16.3047	3.17	9.94336	3.17	-187.666	3.17	-249.389	3.17	45.9727	3.17	572.694		1470	231	562	3964	2012	1531
3.18	200.055	3.18	277.472	3.18	9.47168	3.18	921.666	3.18	85.8535	3.18	49.166	3.18	102	3.18	-42.75	3.18	-242.332	3.18	-288.055	3.18	73.418	3.18	555.917		773	172	458	3779	2537	652
3.19	139	3.19	225.917	3.19	20.5557	3.19	847.971	3.19	95.7598	3.19	51.9434	3.19	-1.2207	3.19	6.5293	3.19	-260.389	3.19	-316.721	3.19	8.13867	3.19	514.751		779	285	451	15590	6915	1537
3.2	99.7227	3.2	170.084	3.2	251.027	3.2	758.807	3.2	135.846	3.2	6.66797	3.2	61.416	3.2	-8.33398	3.2	-204.557	3.2	-382.057	3.2	-79.0273	3.2	537.945		728	191	296	5247	2745	1134
3.21	112.193	3.21	210.972	3.21	501.639	3.21	730.639	3.21	130.666	3.21	44.5273	3.21	103.584	3.21	36.3613	3.21	-194.277	3.21	-410.777	3.21	-13.9434	3.21	537.167		1087	836	419	7195	1811	1608
3.22	54.75	3.22	227.056	3.22	510.139	3.22	790.055	3.22	85.3066	3.22	47.5273	3.22	50.166	3.22	86.832	3.22	-219.25	3.22	-378.889	3.22	32.6387	3.22	530.166		917	193	1439	6068	1800	913
3.23	82.9727	3.23	161.417	3.23	497.639	3.23	715.75	3.23	77.7734	3.23	-41.5293	3.23	54.5	3.23	136.584	3.23	-177.916	3.23	-297.195	3.23	39.916	3.23	568.138		1152	372	865	14112	1361	596
3.24	115.334	3.24	123.832	3.24	534.694	3.24	708.723	3.24	112.619	3.24	-79.6953	3.24	66.5	3.24	87.918	3.24	-131.695	3.24	-391.057	3.24	-11.7773	3.24	556.361		659	191	902	4122	2711	1002
3.25	139.332	3.25	-10.1953	3.25	444.611	3.25	656.777	3.25	90.4199	3.25	-37.834	3.25	68.3047	3.25	18.6387	3.25	-172.305	3.25	-402.945	3.25	-53.5547	3.25	477.832		661	204	483	6295	1403	1097
3.26	67.25	3.26	-185.529	3.26	346.917	3.26	690.111	3.26	68.2734	3.26	-68.5	3.26	49.0547	3.26	32.5566	3.26	-193.195	3.26	-296.193	3.26	9.83203	3.26	527.972		669	177	541	6230	1505	1443
3.27	100.084	3.27	-212.557	3.27	421.777	3.27	607.695	3.27	4.7793	3.27	-111.943	3.27	43.332	3.27	45.8066	3.27	-165.611	3.27	-325.445	3.27	73.6387	3.27	572.805		747	194	340	7526	1308	1183
3.28	76.666	3.28	-62.6953	3.28	473.306	3.28	524.973	3.28	-11.5938	3.28	-119.139	3.28	-3.30469	3.28	-13.6387	3.28	-117.084	3.28	-276.861	3.28	59.2793	3.28	614.695		1723	177	445	8027	2087	1151
3.29	4.02734	3.29	-103.611	3.29	539.194	3.29	417.027	3.29	-40.9805	3.29	-132	3.29	-22.6387	3.29	30.7227	3.29	-82.834	3.29	-271.361	3.29	53.6113	3.29	588.417		791	169	337	4174	3764	635
3.3	15.6953	3.3	-106.611	3.3	539.167	3.3	425.695	3.3	-95.2207	3.3	-146	3.3	-7.72266	3.3	46.75	3.3	-37.4453	3.3	-322.889	3.3	42.6953	3.3	594.416		1020	290	507	14483	2100	4093
3.31	41.4707	3.31	-135.807	3.31	528.166	3.31	389.582	3.31	-80.7598	3.31	-159.945	3.31	12.3066	3.31	53.5547	3.31	-46.8887	3.31	-309.5	3.31	95.5	3.31	564.945		1248	206	378	5075	2906	767
3.32	5.02734	3.32	-153.557	3.32	502.973	3.32	488.027	3.32	-27.4668	3.32	-172.305	3.32	2.30469	3.32	35.4727	3.32	-72.2773	3.32	-259.027	3.32	221.334	3.32	565.723		1249	334	398	17609	1276	737
3.33	72.9434	3.33	-129.221	3.33	533.5	3.33	499.055	3.33	-92.4531	3.33	-174.389	3.33	6.36133	3.33	-54.1387	3.33	-51.8887	3.33	-225.861	3.33	233.805	3.33	612.611		799	168	502	6119	3083	588
3.34	47.416	3.34	-112.527	3.34	613.723	3.34	456.223	3.34	-110.705	3.34	-210.25	3.34	-44.2227	3.34	-127.277	3.34	0.5	3.34	-242.75	3.34	259.971	3.34	592.223		723	166	1585	10578	1925	1112
3.35	78.3887	3.35	-103.473	3.35	669.89	3.35	420.639	3.35	-114.047	3.35	-259.361	3.35	-50.6387	3.35	-142.916	3.35	79.8047	3.35	-260.639	3.35	319.5	3.35	501.279		843	165	422	4620	1313	574
3.36	-2	3.36	-52.6934	3.36	622.611	3.36	512.389	3.36	-138.147	3.36	-242.639	3.36	5.0293	3.36	-56.7227	3.36	127.305	3.36	-236.307	3.36	356.334	3.36	546.222		889	238	747	10748	3149	859
3.37	19.3047	3.37	-45	3.37	618.223	3.37	535.027	3.37	-68.4805	3.37	-162.666	3.37	62.25	3.37	11.416	3.37	160.195	3.37	-110.445	3.37	400.889	3.37	540.805		881	217	658	4517	2634	966
3.38	57.75	3.38	-20.1387	3.38	615.11	3.38	472.389	3.38	16.1934	3.38	-121.416	3.38	73.5273	3.38	-7.5	3.38	158.943	3.38	-26.1953	3.38	403.057	3.38	609.055		780	200	455	9479	5252	1015
3.39	89.8047	3.39	-40.834	3.39	669.694	3.39	376.166	3.39	10.0664	3.39	-67.9453	3.39	34.916	3.39	-39.0566	3.39	160.166	3.39	158.471	3.39	401.473	3.39	645.111		1493	236	400	6980	1378	607
3.4	35.1953	3.4	-103.473	3.4	661.833	3.4	396.723	3.4	-69.6465	3.4	-50.9707	3.4	99.5273	3.4	50.4727	3.4	176.084	3.4	607.193	3.4	443	3.4	659.445		856	230	358	11330	1275	727
3.41	76.9434	3.41	-138.166	3.41	606.083	3.41	397.082	3.41	-84.1543	3.41	-4.13867	3.41	12.5566	3.41	-19.334	3.41	183.277	3.41	1340.83	3.41	571.334	3.41	639.361		705	236	332	10628	5771	2021
3.42	100.223	3.42	-145.221	3.42	559.583	3.42	409.527	3.42	37.9141	3.42	-26.666	3.42	-120.139	3.42	-51.5566	3.42	235.361	3.42	2041.58	3.42	917.555	3.42	726.945		951	604	339	3774	3010	847
3.43	80.5	3.43	-111.777	3.43	556.056	3.43	412.389	3.43	-11.4609	3.43	-7.0293	3.43	-91.916	3.43	-151.75	3.43	257	3.43	2548.17	3.43	1445.78	3.43	823.166		712	171	413	5250	1638	1973
3.44	50.5273	3.44	-32.416	3.44	524.75	3.44	419.277	3.44	-34.8262	3.44	-18.1953	3.44	-148.418	3.44	-192.361	3.44	186.945	3.44	2630.67	3.44	2093.83	3.44	1030.53		739	270	555	11557	2420	812
3.45	-7.72266	3.45	-83.4453	3.45	531.86	3.45	448.332	3.45	-26.0059	3.45	35.8887	3.45	-149.334	3.45	-51.25	3.45	102.943	3.45	2386.47	3.45	2710.58	3.45	1350.5		786	327	318	6047	1534	589
3.46	-29.3613	3.46	-131.971	3.46	573.112	3.46	558.277	3.46	23.4863	3.46	15.418	3.46	-169.139	3.46	-57.6953	3.46	139.418	3.46	1860.89	3.46	3108.58	3.46	1887.64		1161	164	519	7912	1881	663
3.47	33.666	3.47	-189.527	3.47	649.36	3.47	541.639	3.47	67.8652	3.47	-10.7227	3.47	-107.555	3.47	-54.5	3.47	132.139	3.47	1365.33	3.47	3141.58	3.47	2521.67		735	207	533	7562	1578	870
3.48	35.916	3.48	-148.445	3.48	614.25	3.48	558.057	3.48	12.4336	3.48	-31.3887	3.48	-42.0273	3.48	-19.3613	3.48	45.8613	3.48	983.334	3.48	2803.25	3.48	3005.3		838	740	647	9732	10732	663
3.49	-24.6387	3.49	-105.971	3.49	612.694	3.49	510.805	3.49	-32.0547	3.49	39.332	3.49	-6.66602	3.49	8.19531	3.49	126.945	3.49	670.139	3.49	2280.39	3.49	3106.7		1201	244	299	18894	1614	631
3.5	-48	3.5	-71.416	3.5	620.999	3.5	609.139	3.5	-42.6191	3.5	134.084	3.5	-70.584	3.5	81.6113	3.5	97.6387	3.5	505.779	3.5	1825.31	3.5	2929.61		1314	173	337	4731	1334	1715
3.51	-106	3.51	-98.1953	3.51	588.11	3.51	641.305	3.51	-100.84	3.51	139.945	3.51	132.389	3.51	-27.4707	3.51	87.7207	3.51	538.082	3.51	1427.47	3.51	2487		1157	196	714	5047	6499	691
3.52	-216.861	3.52	-163.861	3.52	455.612	3.52	728.527	3.52	-11.1934	3.52	123.75	3.52	-15.75	3.52	13.416	3.52	52.332	3.52	621.193	3.52	1207.11	3.52	2100.53		1042	371	412	10208	2564	1071
3.53	-171.361	3.53	-88.418	3.53	409.14	3.53	703.277	3.53	51.9746	3.53	218.61	3.53	67.8047	3.53	25.2793	3.53	-83.834	3.53	636.334	3.53	1154.19	3.53	1715.25		715	249	346	8047	1271	665
3.54	-156.25	3.54	132.307	3.54	407.944	3.54	641.861	3.54	67.7402	3.54	293.362	3.54	79.8066	3.54	27.25	3.54	-184.777	3.54	621.307	3.54	1140.28	3.54	1424.42		1086	180	434	3745	2455	739
3.55	-149	3.55	69.2227	3.55	430.751	3.55	554.584	3.55	59.4746	3.55	286.749	3.55	121.389	3.55	-14.7773	3.55	-224.777	3.55	598.057	3.55	1109.5	3.55	1191.53		933	233	471	5513	1364	1500
3.56	-159.693	3.56	-108.723	3.56	424.916	3.56	662.777	3.56	136.715	3.56	306.527	3.56	168.777	3.56	7.86133	3.56	-158.25	3.56	493.695	3.56	1113.61	3.56	1164.53		898	170	373	5019	2807	2187
3.57	-125.639	3.57	-160.807	3.57	414.722	3.57	662.361	3.57	198.047	3.57	381.083	3.57	193.668	3.57	97.0273	3.57	-132.027	3.57	377.777	3.57	1114.19	3.57	1056		1351	278	937	9136	2833	679
3.58	-124.555	3.58	-212	3.58	392.473	3.58	716.277	3.58	178.945	3.58	382.14	3.58	272	3.58	105.916	3.58	5.55469	3.58	187.25	3.58	1093.64	3.58	1071.25		918	537	734	6568	3206	1558
3.59	-207.389	3.59	-243.584	3.59	450.695	3.59	781.168	3.59	151.246	3.59	392.306	3.59	278.139	3.59	155.668	3.59	138.029	3.59	51.418	3.59	941.916	3.59	1111.83		1492	194	475	6386	3224	864
3.6	-299.472	3.6	-243.389	3.6	489.001	3.6	734.943	3.6	143.033	3.6	376.89	3.6	262.445	3.6	184.5	3.6	239	3.6	70.6953	3.6	814.084	3.6	1088.83		829	168	396	5980	2818	1268
3.61	-254.999	3.61	-230.332	3.61	433.944	3.61	634.473	3.61	162.1	3.61	429.167	3.61	363.307	3.61	175.582	3.61	209	3.61	16.25	3.61	723.057	3.61	983.86		1293	215	545	4157	5750	610
3.62	-165.167	3.62	-217.916	3.62	384.501	3.62	607.389	3.62	185.086	3.62	466.249	3.62	617.445	3.62	299.834	3.62	160.918	3.62	-89.832	3.62	654.777	3.62	911.556		1341	175	452	5618	2729	1099
3.63	-180.861	3.63	-213.555	3.63	441.027	3.63	633.25	3.63	166.039	3.63	471.695	3.63	1014.58	3.63	433.334	3.63	140.195	3.63	-51.7207	3.63	629.361	3.63	894.916		1203	252	453	6811	1404	636
3.64	-150.36	3.64	-151.445	3.64	405.445	3.64	570.332	3.64	191.445	3.64	482.972	3.64	1515	3.64	583.195	3.64	240.221	3.64	-27.3887	3.64	575.194	3.64	847.277		1168	370	696	12628	2406	1035
3.65	-137.389	3.65	-117.223	3.65	354.639	3.65	563.973	3.65	285.025	3.65	449.805	3.65	2104.81	3.65	882.279	3.65	359.084	3.65	-84.3613	3.65	542.888	3.65	789		691	202	892	3923	1898	1026
3.66	-195.777	3.66	-104.723	3.66	349.249	3.66	628.75	3.66	337.006	3.66	412.778	3.66	2661	3.66	1372.67	3.66	369.973	3.66	-65.832	3.66	483.667	3.66	821.556		1108	187	357	3984	2181	2384
3.67	-195.167	3.67	-67.8047	3.67	336.499	3.67	747.139	3.67	325.613	3.67	451.89	3.67	3161.67	3.67	1886.44	3.67	549.111	3.67	-47.0547	3.67	432.028	3.67	828.334		1471	211	407	5768	2173	664
3.68	-194	3.68	-87.0293	3.68	269.667	3.68	769.777	3.68	377.6	3.68	497.25	3.68	3491.8	3.68	2384.53	3.68	816.75	3.68	-72.9707	3.68	375.471	3.68	808.555		946	411	298	12004	2091	1928
3.69	-128.001	3.69	-189.166	3.69	278.166	3.69	824.777	3.69	392.926	3.69	455.89	3.69	3470.78	3.69	2846.47	3.69	1249.11	3.69	-107.027	3.69	339.139	3.69	750.888		1021	258	615	6437	2692	1030
3.7	-146.055	3.7	-280.973	3.7	281.445	3.7	1010.44	3.7	458.334	3.7	345	3.7	3222.83	3.7	3226.25	3.7	1794.19	3.7	-57.7207	3.7	417.14	3.7	781.61		730	221	335	25523	3035	578
3.71	-162.973	3.71	-166.695	3.71	339.972	3.71	1303.97	3.71	433.586	3.71	313.306	3.71	2684.67	3.71	3250.11	3.71	2290.47	3.71	-45.6387	3.71	405.361	3.71	814.445		1179	273	317	15734	5773	1209
3.72	-216.64	3.72	-145.25	3.72	349.473	3.72	1531.28	3.72	437.945	3.72	327.778	3.72	1911.31	3.72	3043.58	3.72	2862.06	3.72	-49.416	3.72	396.806	3.72	786.39		765	239	468	7820	1481	1801
3.73	-171.083	3.73	-204.807	3.73	378.61	3.73	1724.94	3.73	413.795	3.73	325.249	3.73	1247.64	3.73	2437.44	3.73	3243.28	3.73	-6.7207	3.73	375.888	3.73	704.612		826	166	378	17647	2818	1431
3.74	-238.528	3.74	-222.305	3.74	341.583	3.74	1965.92	3.74	518.154	3.74	281.306	3.74	701.279	3.74	1767.69	3.74	3319.97	3.74	-72.2227	3.74	387.306	3.74	649.139		919	170	301	8863	2181	563
3.75	-304.139	3.75	-126.25	3.75	324.056	3.75	2256.22	3.75	694.094	3.75	264.75	3.75	572.861	3.75	1204.28	3.75	3059.47	3.75	-111.166	3.75	361.723	3.75	568.111		1230	324	379	10021	4315	840
3.76	-371.25	3.76	-17.8613	3.76	260.001	3.76	2699.33	3.76	780.826	3.76	226.751	3.76	366.279	3.76	765.582	3.76	2550.72	3.76	-75.416	3.76	296.806	3.76	568.694		1509	399	366	3969	4853	1160
3.77	-317.278	3.77	-5.44531	3.77	288.444	3.77	3346.53	3.77	879.807	3.77	288.278	3.77	113.25	3.77	553.916	3.77	1897.14	3.77	-27.666	3.77	258.556	3.77	533.889		885	178	366	21819	2274	1048
3.78	-245.666	3.78	-45.1113	3.78	309.583	3.78	3989.17	3.78	1081.34	3.78	290.167	3.78	21.5566	3.78	497.279	3.78	1241.61	3.78	-173.029	3.78	254.528	3.78	508.251		695	253	401	7464	1795	744
3.79	-251.667	3.79	-45.417	3.79	403.305	3.79	4370.39	3.79	1408.87	3.79	398.611	3.79	-172.305	3.79	454.389	3.79	897.306	3.79	-243.389	3.79	261.39	3.79	471.444		663	188	368	6493	3752	1068
3.8	-247.333	3.8	26.833	3.8	486.944	3.8	4787.5	3.8	1784.5	3.8	547.86	3.8	-117.055	3.8	350.139	3.8	647.694	3.8	-153.693	3.8	261.527	3.8	425.167		783	170	442	12943	2889	1839
3.81	-231.027	3.81	43.0283	3.81	475.888	3.81	5130.08	3.81	2296.17	3.81	753.167	3.81	-48.1387	3.81	231.361	3.81	493.167	3.81	-170.779	3.81	263.389	3.81	402.111		1045	220	498	5532	1485	860
3.82	-133.861	3.82	-27.3887	3.82	410.166	3.82	5141.69	3.82	3047.67	3.82	1049.28	3.82	-34.4453	3.82	293.529	3.82	395	3.82	-116.084	3.82	250.75	3.82	422.89		865	217	440	9902	1820	1345
3.83	-162.222	3.83	-51.6103	3.83	327.472	3.83	4378.44	3.83	3587.7	3.83	1551.75	3.83	-134.611	3.83	272.973	3.83	309.082	3.83	17.4453	3.83	267.166	3.83	458.917		1032	165	862	16087	5248	1119
3.84	-277.25	3.84	-3.11133	3.84	294.917	3.84	3451	3.84	3804.23	3.84	2292.64	3.84	-104.166	3.84	271.555	3.84	259.918	3.84	111.805	3.84	340.389	3.84	515.528		1061	681	323	8681	3031	590
3.85	-220.722	3.85	40.7227	3.85	370.501	3.85	2627.33	3.85	3675.8	3.85	2875.25	3.85	36.8613	3.85	244.639	3.85	135.861	3.85	135.473	3.85	418.444	3.85	534.417		1038	161	353	7518	1338	1611
3.86	-166.973	3.86	37.6387	3.86	340.639	3.86	2002.11	3.86	3217.63	3.86	3377.25	3.86	107.361	3.86	263.973	3.86	61.418	3.86	133.973	3.86	494.277	3.86	581.195		684	201	815	18167	5259	640
3.87	-186.806	3.87	-60.0273	3.87	343.167	3.87	1470.47	3.87	2611.78	3.87	3512.83	3.87	196.834	3.87	268.777	3.87	78.9707	3.87	169.305	3.87	590.556	3.87	569.417		1085	240	396	5065	4115	607
3.88	-64.9443	3.88	-61.917	3.88	357.139	3.88	1170.97	3.88	2068.13	3.88	3220.69	3.88	160.332	3.88	343.693	3.88	147.25	3.88	151.5	3.88	654.111	3.88	548.666		998	168	326	3824	1682	1377
3.89	-33.4443	3.89	-11.8604	3.89	400.084	3.89	897.139	3.89	1532.41	3.89	2733.61	3.89	52.582	3.89	355.166	3.89	163.389	3.89	127.889	3.89	684.694	3.89	634.417		841	164	317	9117	1360	2135
3.9	-66.4443	3.9	-4.91699	3.9	429.555	3.9	954.777	3.9	1222.87	3.9	2233.36	3.9	10.5	3.9	329.583	3.9	161.5	3.9	142.777	3.9	683.89	3.9	746.722		767	228	336	8662	2162	599
3.91	59.3613	3.91	-52.0273	3.91	347.61	3.91	983.723	3.91	1037.71	3.91	1659.39	3.91	-120	3.91	259.223	3.91	135.973	3.91	5.44531	3.91	668.944	3.91	768.666		1458	170	709	6635	8238	1111
3.92	-30.6943	3.92	-30.583	3.92	277.723	3.92	989.943	3.92	933.279	3.92	1095.56	3.92	-177.166	3.92	182.779	3.92	60.0547	3.92	-209.361	3.92	525.277	3.92	839.194		870	322	720	10919	1744	757
3.93	-114.389	3.93	-89.0557	3.93	314.917	3.93	1016.47	3.93	839.18	3.93	883.862	3.93	-121.777	3.93	51.9434	3.93	-7.66797	3.93	-259.973	3.93	419	3.93	749.056		722	269	311	4338	2121	1461
3.94	-138.667	3.94	-155.639	3.94	292.223	3.94	1011.33	3.94	919.92	3.94	716.806	3.94	-32.916	3.94	-87.3613	3.94	-7.05664	3.94	-310.917	3.94	249.695	3.94	694.222		1297	234	534	4786	2513	837
3.95	-78.1113	3.95	-188	3.95	228.777	3.95	1055.89	3.95	969.093	3.95	595.639	3.95	-77.416	3.95	22.1113	3.95	-89.9727	3.95	-368.333	3.95	126.666	3.95	618.777		1187	163	596	5883	2173	825
3.96	-86.333	3.96	-176.528	3.96	203.306	3.96	1240.44	3.96	1006.7	3.96	631.138	3.96	-134.721	3.96	0.195312	3.96	-140.222	3.96	-381.444	3.96	85.8047	3.96	601.444		813	274	577	12359	2080	1000
3.97	-27.4727	3.97	-179.667	3.97	279.694	3.97	1824.08	3.97	1131.03	3.97	662.25	3.97	-103.75	3.97	1.97266	3.97	-60.9443	3.97	-414.945	3.97	135.111	3.97	579.944		791	192	644	13682	1317	563
3.98	27.4443	3.98	-125.777	3.98	253.333	3.98	3131.72	3.98	1544.82	3.98	705.472	3.98	13.332	3.98	72.7783	3.98	-71.4443	3.98	-459.194	3.98	143.527	3.98	507.333		1026	174	636	11258	4663	1034
3.99	7.86035	3.99	-99.2773	3.99	239.278	3.99	4183.31	3.99	2414.13	3.99	844.444	3.99	-80.332	3.99	85.1103	3.99	-144.667	3.99	-488.473	3.99	36.0547	3.99	481.36		1148	707	891	5128	1346	1973
4	-67	4	-138.027	4	274.39	4	4372.81	4	3358.47	4	1132.78	4	-184.389	4	112.638	4	-168.528	4	-399.723	4	-4.80469	4	389.667		772	348	299	12186	1310	679
4.01	8.41699	4.01	-208.64	4.01	276.056	4.01	3584	4.01	3505.85	4.01	1793.61	4.01	-202.027	4.01	56.3613	4.01	-204.25	4.01	-455.305	4.01	55.6397	4.01	344.889		1026	185	753	11925	2327	924
4.02	58.1943	4.02	-174.861	4.02	192.083	4.02	2565.58	4.02	2973.01	4.02	2647.81	4.02	-209.666	4.02	90.833	4.02	-159.39	4.02	-516.861	4.02	22.25	4.02	367.36		1925	1170	411	12290	3767	876
4.03	1.05566	4.03	-129.306	4.03	182.5	4.03	1971.94	4.03	2205.81	4.03	2808.64	4.03	-157.75	4.03	104.694	4.03	-127.777	4.03	-513.195	4.03	46.1113	4.03	378.028		1485	203	335	9169	1798	953
4.04	-106.278	4.04	-127.028	4.04	172.444	4.04	2124.3	4.04	1889.09	4.04	2427	4.04	-136.834	4.04	139.11	4.04	-52.916	4.04	-465.778	4.04	70.8057	4.04	392.139		1767	167	548	4162	1329	794
4.05	-150.973	4.05	-79.1113	4.05	217.277	4.05	2499.36	4.05	1869.17	4.05	1733.86	4.05	-93.334	4.05	115.666	4.05	-89.7227	4.05	-533.084	4.05	102.86	4.05	333.584		1426	237	671	4447	2107	1523
4.06	-99.083	4.06	-18.167	4.06	246.806	4.06	3044.05	4.06	2070.47	4.06	1271.58	4.06	-27.8613	4.06	63.1113	4.06	-74.5	4.06	-584.916	4.06	273	4.06	356.556		949	183	704	6638	3028	1084
4.07	39.833	4.07	-55.167	4.07	310	4.07	3198.97	4.07	2462.05	4.07	1318.75	4.07	-67.25	4.07	33.3887	4.07	-60.8057	4.07	-536.555	4.07	193.917	4.07	318.777		1446	186	774	4764	3995	1110
4.08	-17.3057	4.08	-87.8057	4.08	221	4.08	2935.42	4.08	2646.34	4.08	1559.81	4.08	-118.334	4.08	-21.8887	4.08	-70.3887	4.08	-544.001	4.08	63.9717	4.08	233.751		736	165	554	10182	2274	848
4.09	-103.777	4.09	-27.8057	4.09	193.083	4.09	2485.72	4.09	2518.95	4.09	1846.19	4.09	-175.168	4.09	32.6397	4.09	-70.333	4.09	-605.723	4.09	91.5557	4.09	221.194		1250	343	692	9703	1705	1051
4.1	-114.5	4.1	-43.1397	4.1	241.75	4.1	2081.56	4.1	2164.82	4.1	2048.17	4.1	-141.832	4.1	175.473	4.1	-29.834	4.1	-611.111	4.1	128.473	4.1	240.861		987	217	390	9000	1301	1779
4.11	5.72168	4.11	-84.0273	4.11	246.472	4.11	1728.67	4.11	1920.83	4.11	2069.75	4.11	0.25	4.11	120	4.11	-67.9443	4.11	-650.639	4.11	135.694	4.11	204.194		1006	433	333	17985	1990	644
4.12	24	4.12	-100.166	4.12	194.167	4.12	1731.92	4.12	1820.13	4.12	1769.56	4.12	94.2793	4.12	82.334	4.12	-2.38867	4.12	-625.25	4.12	106.306	4.12	315.223		751	362	358	4431	3025	1102
4.13	18.8057	4.13	-99.0557	4.13	197	4.13	1656.92	4.13	1626.39	4.13	1533.33	4.13	39.2793	4.13	125.084	4.13	15.416	4.13	-574.307	4.13	82.333	4.13	351.806		888	174	658	17350	5400	608
4.14	63.75	4.14	-98.9727	4.14	144.028	4.14	1645.83	4.14	1449.61	4.14	1379.92	4.14	26.8613	4.14	323.722	4.14	4.16699	4.14	-583.943	4.14	83.583	4.14	271.5		718	225	463	6173	1465	798
4.15	82.333	4.15	-142.333	4.15	204.444	4.15	1613.92	4.15	1281.25	4.15	1277.83	4.15	-11.1387	4.15	239.75	4.15	26.75	4.15	-595.249	4.15	172.584	4.15	192		849	163	825	11892	1608	1565
4.16	205.389	4.16	-201.861	4.16	243	4.16	1590.47	4.16	1214.13	4.16	1125.75	4.16	-7.61133	4.16	313.056	4.16	137.056	4.16	-593.193	4.16	109.75	4.16	192.556		817	168	633	6583	1756	1041
4.17	184.083	4.17	-105.277	4.17	258.111	4.17	1561.97	4.17	1227.14	4.17	985.694	4.17	66.582	4.17	324.694	4.17	157	4.17	-582.583	4.17	63	4.17	249.25		803	200	395	3814	1582	602
4.18	77.3603	4.18	115.028	4.18	242.306	4.18	1692.78	4.18	1238.47	4.18	932.306	4.18	123.666	4.18	264.306	4.18	105.25	4.18	-545.194	4.18	30.333	4.18	153.694		657	164	886	5102	1524	830
4.19	-13.833	4.19	87.2227	4.19	262.277	4.19	1686	4.19	1301.55	4.19	959.694	4.19	164.555	4.19	319.444	4.19	105.167	4.19	-533.111	4.19	10.9727	4.19	54.083		1431	254	376	8254	1430	2187
4.2	-69	4.2	93.1943	4.2	239.917	4.2	1602.97	4.2	1293.12	4.2	987.778	4.2	208.223	4.2	329.473	4.2	141.5	4.2	-523.194	4.2	-45.3603	4.2	160.973		826	493	551	9371	1444	1100
4.21	-22.2227	4.21	59.1943	4.21	308.5	4.21	1299.64	4.21	1245.2	4.21	924.556	4.21	133.75	4.21	292.5	4.21	64.8613	4.21	-450.75	4.21	-69.8057	4.21	109.361		971	245	341	6757	2363	1070
4.22	34.5557	4.22	7.58301	4.22	353.027	4.22	1207.14	4.22	1214.53	4.22	880.138	4.22	104.139	4.22	312.473	4.22	40.3057	4.22	-484.194	4.22	-157.972	4.22	148.417		1690	597	297	10464	2650	2030
4.23	39.4443	4.23	-1.66699	4.23	370.223	4.23	1113.36	4.23	1152.47	4.23	845.751	4.23	115.473	4.23	305.723	4.23	172.639	4.23	-472.556	4.23	-275.194	4.23	150.417		731	301	313	6939	1576	711
4.24	5.16699	4.24	54.166	4.24	342.389	4.24	1045.53	4.24	1112.05	4.24	805.862	4.24	176.945	4.24	277.306	4.24	187.444	4.24	-426.584	4.24	-255.083	4.24	162.889		1289	174	1481	10546	3299	806
4.25	17.6387	4.25	111.389	4.25	289.028	4.25	1019.81	4.25	1140.17	4.25	780.944	4.25	194.277	4.25	285.972	4.25	167.917	4.25	-340.472	4.25	-51.166	4.25	216.472		801	230	511	4277	2846	694
4.26	-14.9727	4.26	75.417	4.26	256.944	4.26	1050.19	4.26	1240.93	4.26	839.222	4.26	155.25	4.26	302.973	4.26	146.917	4.26	-462.083	4.26	35.6113	4.26	245.556		874	166	826	3971	3493	816
4.27	30.0283	4.27	27.0273	4.27	276.889	4.27	1043.89	4.27	1101.31	4.27	789.833	4.27	124.221	4.27	289.778	4.27	146.777	4.27	-451.917	4.27	44.5283	4.27	183.166		1102	170	383	12934	4792	1611
4.28	90.3057	4.28	7.25	4.28	361.973	4.28	986.666	4.28	967.067	4.28	733.138	4.28	134.584	4.28	237.583	4.28	164.056	4.28	-432.833	4.28	135.14	4.28	120.167		708	386	576	7641	1441	765
4.29	-26.25	4.29	104.861	4.29	431.722	4.29	947.834	4.29	912.388	4.29	696.805	4.29	185.361	4.29	238.139	4.29	191.027	4.29	-480.917	4.29	188.306	4.29	85.5557		1296	167	376	4609	1714	626
4.3	-58.333	4.3	159.084	4.3	473.528	4.3	963.277	4.3	895.947	4.3	693.862	4.3	291.584	4.3	328.139	4.3	152.083	4.3	-515.417	4.3	133.306	4.3	204.611		762	223	379	4592	1353	775
4.31	49.4727	4.31	54.083	4.31	392.694	4.31	1005.75	4.31	870.567	4.31	645.917	4.31	259	4.31	352.64	4.31	132.584	4.31	-465.917	4.31	120.89	4.31	203.416		1222	184	587	5551	1558	1405
4.32	-6.72168	4.32	39.416	4.32	416.444	4.32	912.695	4.32	862.88	4.32	632.166	4.32	225.029	4.32	349.889	4.32	139.556	4.32	-476.889	4.32	195.278	4.32	218		968	567	316	6128	6197	1100
4.33	-64.833	4.33	44.8057	4.33	666.917	4.33	883.445	4.33	845	4.33	580.862	4.33	253.973	4.33	412.611	4.33	191.473	4.33	-462.222	4.33	196.417	4.33	240		687	423	441	8359	3559	1538
4.34	-106.333	4.34	72.0283	4.34	641.777	4.34	984.083	4.34	809.567	4.34	532.167	4.34	359.223	4.34	447.723	4.34	198.723	4.34	-414.833	4.34	155.083	4.34	263.25		828	311	321	9857	1778	718
4.35	-124.389	4.35	101	4.35	613.278	4.35	1007.39	4.35	778.893	4.35	597.195	4.35	424.75	4.35	336.306	4.35	230.583	4.35	-332.556	4.35	215.14	4.35	301.056		669	213	722	14327	3377	973
4.36	-167	4.36	148.889	4.36	705	4.36	1075.86	4.36	817.207	4.36	650.361	4.36	405.334	4.36	236.612	4.36	310.611	4.36	-216.611	4.36	284.139	4.36	377.89		717	208	339	10010	5097	1169
4.37	-183.611	4.37	157.39	4.37	823.223	4.37	1158.11	4.37	774.173	4.37	677.499	4.37	292.916	4.37	236.277	4.37	306.25	4.37	-192.861	4.37	225.389	4.37	334.472		986	242	703	6496	5108	1076
4.38	-230.889	4.38	84.2783	4.38	750.25	4.38	1326.86	4.38	819.267	4.38	795.973	4.38	212.25	4.38	274.028	4.38	377.5	4.38	-219.194	4.38	137.778	4.38	280.556		1174	290	452	11149	2782	2527
4.39	-204.25	4.39	13.833	4.39	679.889	4.39	1474.72	4.39	953.019	4.39	879.362	4.39	151.332	4.39	250.86	4.39	360.722	4.39	-95.917	4.39	53.417	4.39	242.11		751	164	494	11807	2384	1018
4.4	-172.444	4.4	44.3613	4.4	717.61	4.4	1586.86	4.4	1043.42	4.4	925.333	4.4	20.9453	4.4	266.75	4.4	345.639	4.4	-91.3613	4.4	101.64	4.4	314.444		1086	582	715	6795	1873	613
4.41	-174.389	4.41	20.9717	4.41	726.944	4.41	1679.14	4.41	1095.99	4.41	984.194	4.41	-97.833	4.41	286.917	4.41	248.333	4.41	-90.333	4.41	285.361	4.41	426.861		680	266	373	12764	2104	588
4.42	-211.667	4.42	-1.61133	4.42	772.167	4.42	1572.72	4.42	1092.75	4.42	1091.08	4.42	-248.695	4.42	307.972	4.42	256.972	4.42	-149.834	4.42	418.5	4.42	410.694		684	458	383	4253	8335	1610
4.43	-209	4.43	-51.833	4.43	883.806	4.43	1343.97	4.43	1094.28	4.43	1097.19	4.43	-294.167	4.43	201.89	4.43	174.639	4.43	-146.111	4.43	405.444	4.43	418.639		979	2094	1034	7219	2239	1290
4.44	-158.389	4.44	-76.4727	4.44	883.583	4.44	1202.89	4.44	1004.81	4.44	1121.58	4.44	-347.723	4.44	66.1387	4.44	130.722	4.44	-123.222	4.44	443.972	4.44	446.334		1397	302	467	3981	1715	678
4.45	-241.389	4.45	-19.1113	4.45	915	4.45	1241.72	4.45	784.32	4.45	1067.28	4.45	-388.277	4.45	4.19434	4.45	-17.4717	4.45	-63.166	4.45	515.75	4.45	385.11		979	196	344	6704	3270	1272
4.46	-182.444	4.46	42.417	4.46	954.277	4.46	1456.92	4.46	714.113	4.46	815.361	4.46	-352	4.46	-47.8057	4.46	-119.611	4.46	-54.9727	4.46	540.667	4.46	437.723		673	223	330	14868	3678	883
4.47	-204.89	4.47	57.7783	4.47	988.277	4.47	1888.22	4.47	706.387	4.47	766.972	4.47	-410.139	4.47	3.61133	4.47	-154.5	4.47	-120.972	4.47	513.86	4.47	441.944		901	335	312	9007	1942	1208
4.48	-207.083	4.48	86.75	4.48	1027.78	4.48	2195.81	4.48	864.968	4.48	784.194	4.48	-618.834	4.48	8.27734	4.48	-91.8057	4.48	-193.333	4.48	521.556	4.48	421.389		1577	218	341	20041	4513	605
4.49	-197.416	4.49	-14.25	4.49	1054.42	4.49	2083.56	4.49	1187.87	4.49	856.944	4.49	-628.86	4.49	23.5557	4.49	-0.361328	4.49	-256.278	4.49	557.417	4.49	386.861		665	189	530	10538	1561	982
4.5	-221.861	4.5	-56.5557	4.5	943.973	4.5	2053.86	4.5	1393	4.5	1089.97	4.5	-631.89	4.5	-49.833	4.5	75.667	4.5	-259.75	4.5	441	4.5	323.861		672	692	569	9633	1922	619
4.51	-179.444	4.51	-17.2227	4.51	901.556	4.51	1990.39	4.51	1352.87	4.51	1368.5	4.51	-673.695	4.51	27.4443	4.51	20.2217	4.51	-235.027	4.51	417.333	4.51	243.861		831	176	378	15443	4425	586
4.52	-139.889	4.52	-33.6387	4.52	930.556	4.52	1872.56	4.52	1294.52	4.52	1338.56	4.52	-718.916	4.52	71.583	4.52	-4.69434	4.52	-249.139	4.52	434.028	4.52	187.444		671	172	305	11646	2971	1413
4.53	-156.056	4.53	44.333	4.53	912.166	4.53	1623.03	4.53	1264.13	4.53	1203.58	4.53	-674.693	4.53	-5.63965	4.53	-26.917	4.53	-214.889	4.53	394.25	4.53	235.278		978	430	445	11065	1775	1293
4.54	-176.139	4.54	37.1943	4.54	800.694	4.54	1532.83	4.54	1171.15	4.54	1224.31	4.54	-489.223	4.54	-108.777	4.54	38.7217	4.54	-227.89	4.54	345.889	4.54	269.584		1256	205	354	10353	2122	996
4.55	-138.444	4.55	-8.05566	4.55	766.89	4.55	1561.06	4.55	916.473	4.55	1226.31	4.55	-402.472	4.55	-138.917	4.55	3.75	4.55	-153.417	4.55	368.11	4.55	289.833		1064	573	365	28415	2178	3482
4.56	-156.694	4.56	25.5273	4.56	760.806	4.56	1533.14	4.56	762.727	4.56	978.583	4.56	-417.417	4.56	-188.084	4.56	1.61133	4.56	-194.334	4.56	374.056	4.56	291.639		1178	226	399	36828	2331	796
4.57	-129.61	4.57	1.47266	4.57	788.611	4.57	1453.19	4.57	642.567	4.57	728.584	4.57	-407.25	4.57	-225.583	4.57	1.63965	4.57	-230.306	4.57	416.444	4.57	216.556		1982	289	403	20175	3234	1117
4.58	-179	4.58	14.5273	4.58	728.277	4.58	1413.36	4.58	522.767	4.58	650.778	4.58	-390.25	4.58	-126.611	4.58	117.583	4.58	-248.861	4.58	507.416	4.58	174.027		1263	164	316	15470	1534	565
4.59	-174.222	4.59	-45.2773	4.59	654.167	4.59	1438.39	4.59	426.567	4.59	537.194	4.59	-246.777	4.59	124.222	4.59	194.139	4.59	-223.556	4.59	526.806	4.59	50.8613		1747	370	302	30698	3183	831
4.6	-122	4.6	-6.69434	4.6	667.194	4.6	1315.75	4.6	430.393	4.6	347.917	4.6	-216.61	4.6	233.973	4.6	161.167	4.6	-250.306	4.6	602.917	4.6	9.22266		1036	163	404	9803	1678	1166
4.61	-78.8057	4.61	-28.3896	4.61	679.083	4.61	1113.58	4.61	539.833	4.61	272.14	4.61	-159.75	4.61	161.167	4.61	176.889	4.61	-212.389	4.61	700.639	4.61	132.473		1234	235	560	29310	4782	872
4.62	-113.028	4.62	-51.8057	4.62	668.611	4.62	1033.39	4.62	554.513	4.62	322.277	4.62	-248.473	4.62	140.778	4.62	141.25	4.62	-114.084	4.62	682.806	4.62	195.694		874	162	546	18207	1940	606
4.63	-23.083	4.63	-66.6943	4.63	708.306	4.63	1042.33	4.63	614.393	4.63	420.611	4.63	-158.723	4.63	11.2227	4.63	138.306	4.63	-78.2227	4.63	642.75	4.63	192.583		1544	403	671	14761	1396	1195
4.64	-41.167	4.64	-23.3613	4.64	775.889	4.64	1024.36	4.64	635.993	4.64	317.36	4.64	-121.277	4.64	129.278	4.64	135.222	4.64	-69.6397	4.64	577.889	4.64	181.806		680	193	753	17342	1579	793
4.65	25.667	4.65	45.8603	4.65	772.167	4.65	941.389	4.65	502.113	4.65	333.666	4.65	-87.6943	4.65	137.25	4.65	148.444	4.65	-65.5557	4.65	577.416	4.65	182.028		2181	160	676	15831	4374	1076
4.66	-19.8057	4.66	9.30566	4.66	732.25	4.66	967.25	4.66	413.473	4.66	363.277	4.66	-49.166	4.66	113.222	4.66	270.75	4.66	-26.3057	4.66	543.556	4.66	244.917		1259	210	374	15486	1332	852
4.67	-0.5	4.67	-22.3057	4.67	760.139	4.67	955	4.67	467.92	4.67	406.028	4.67	54.1113	4.67	196.777	4.67	295.611	4.67	-42.8887	4.67	545.806	4.67	225.666		1008	232	367	8994	3214	1139
4.68	35.9443	4.68	3.11133	4.68	700.806	4.68	977.89	4.68	471.367	4.68	409.723	4.68	-33.417	4.68	146.306	4.68	251.167	4.68	75.6943	4.68	498.223	4.68	205.111		677	231	692	13478	5109	1500
4.69	109.389	4.69	-35.3603	4.69	670.083	4.69	1048.97	4.69	340.007	4.69	327.473	4.69	-155.75	4.69	65.5273	4.69	292.584	4.69	190.056	4.69	450.36	4.69	187.973		793	222	378	12694	2321	627
4.7	146.75	4.7	-78.7227	4.7	700.5	4.7	1112.58	4.7	372.133	4.7	226.75	4.7	-255.167	4.7	30.8057	4.7	278.806	4.7	417.444	4.7	540.806	4.7	256.223		828	190	377	35154	3589	591
4.71	185.5	4.71	-44.2227	4.71	740.667	4.71	1006.42	4.71	500.66	4.71	72.3613	4.71	-207.722	4.71	-18.667	4.71	318.25	4.71	516.944	4.71	807.056	4.71	367.139		894	204	479	11560	6525	571
4.72	2.16602	4.72	25.333	4.72	664.056	4.72	1081.33	4.72	504.981	4.72	222.417	4.72	-239	4.72	-147.5	4.72	219.5	4.72	291.25	4.72	960.777	4.72	567.556		786	259	338	22868	1371	1060
4.73	-59.416	4.73	28.6113	4.73	648.806	4.73	1190.56	4.73	465.767	4.73	316.806	4.73	-147.111	4.73	-418.194	4.73	-24.8613	4.73	86.667	4.73	916.889	4.73	677.194		1122	186	421	18639	2767	858
4.74	59.5	4.74	9.91602	4.74	642.417	4.74	1139.94	4.74	501.36	4.74	427.223	4.74	-121.389	4.74	-604.277	4.74	-18.5283	4.74	-11.1113	4.74	554.25	4.74	650.028		1189	233	441	46241	2057	1407
4.75	24.167	4.75	14.0557	4.75	633.278	4.75	995.777	4.75	603.3	4.75	424.306	4.75	-77.917	4.75	-632.723	4.75	23.334	4.75	-62.3897	4.75	372.583	4.75	470.083		1073	410	422	20462	3162	1053
4.76	38	4.76	35.9727	4.76	574.25	4.76	975.834	4.76	660.887	4.76	454.973	4.76	-98.8613	4.76	-314.472	4.76	110.194	4.76	-102.194	4.76	304.472	4.76	355.139		1112	260	335	15098	2146	1133
4.77	87.6387	4.77	41.916	4.77	492.694	4.77	1021.47	4.77	636.58	4.77	510.11	4.77	-105.223	4.77	-77.916	4.77	177.334	4.77	-111.361	4.77	255.834	4.77	313.334		919	175	337	7243	5672	598
4.78	112.64	4.78	-11.917	4.78	464.833	4.78	966.084	4.78	558.74	4.78	428.944	4.78	-6.61133	4.78	-63.3613	4.78	167.083	4.78	-89.7773	4.78	239.917	4.78	292.694		778	240	511	8263	3002	744
4.79	166.333	4.79	-41.084	4.79	500.5	4.79	943.806	4.79	447.993	4.79	327.5	4.79	-37.5557	4.79	-8.66699	4.79	174.861	4.79	-71.8057	4.79	172.667	4.79	242.056		1016	173	387	17349	2350	932
4.8	107.028	4.8	-40.6943	4.8	506.611	4.8	1004	4.8	415.213	4.8	256.86	4.8	47.833	4.8	-81	4.8	177.444	4.8	-100.944	4.8	135.834	4.8	240.834		781	214	297	8593	1595	662
4.81	82.5	4.81	-48.8613	4.81	558	4.81	971.083	4.81	384.027	4.81	260.5	4.81	137.417	4.81	-81.6397	4.81	173.916	4.81	-89.1387	4.81	137	4.81	216.528		740	333	316	17294	3336	843
4.82	3.08301	4.82	-65.1943	4.82	544.167	4.82	1010.17	4.82	321.027	4.82	288.194	4.82	131.528	4.82	-144.917	4.82	110.306	4.82	-39.6113	4.82	155.667	4.82	191.75		1217	298	485	19772	4649	2471
4.83	-31.8613	4.83	-69.084	4.83	477	4.83	991.5	4.83	315.213	4.83	232.972	4.83	221.64	4.83	29.1396	4.83	138.723	4.83	-1.19434	4.83	189.556	4.83	164.833		825	172	305	22254	4673	993
4.84	6.88867	4.84	-34.6397	4.84	388.611	4.84	1197.61	4.84	341.973	4.84	370.194	4.84	321.056	4.84	74.8603	4.84	239.334	4.84	-110.14	4.84	136.834	4.84	194.306		767	189	327	19207	1833	831
4.85	116.944	4.85	-33.417	4.85	429.917	4.85	1320.42	4.85	370.4	4.85	335.056	4.85	695.306	4.85	230.777	4.85	299.5	4.85	-215.194	4.85	129.056	4.85	221.777		1115	227	497	17142	1613	865
4.86	67.2227	4.86	-27.4443	4.86	434.666	4.86	1356.86	4.86	391.447	4.86	373	4.86	1344.61	4.86	942.556	4.86	346.25	4.86	-463.39	4.86	121.25	4.86	263.167		1003	216	1085	26096	2103	571
4.87	70.917	4.87	-12.166	4.87	415.861	4.87	1231.56	4.87	450	4.87	371.473	4.87	1229.47	4.87	1083.19	4.87	557.027	4.87	-535.277	4.87	86.7783	4.87	301.139		753	233	324	23848	2685	577
4.88	14.0557	4.88	-9.61133	4.88	347.973	4.88	1230.94	4.88	424.5	4.88	386.166	4.88	750.14	4.88	270.5	4.88	1175.31	4.88	-214.917	4.88	138.194	4.88	310.639		1051	365	342	8094	1773	669
4.89	-56.25	4.89	46.6943	4.89	411.75	4.89	1292.83	4.89	257.033	4.89	373.667	4.89	505.806	4.89	-538.194	4.89	1082.11	4.89	-44.2783	4.89	159.861	4.89	272.722		723	427	446	9158	4216	1578
4.9	25.167	4.9	40.6943	4.9	429.944	4.9	1499.97	4.9	273.913	4.9	350.417	4.9	350.694	4.9	-405.973	4.9	468.861	4.9	-3.83301	4.9	214.89	4.9	319.5		706	162	320	11414	1984	906
4.91	82.083	4.91	-33.2773	4.91	390.027	4.91	1611.33	4.91	383.14	4.91	381.973	4.91	136.61	4.91	-233.028	4.91	261.611	4.91	53.9443	4.91	244.5	4.91	351.306		798	166	347	16716	1425	1119
4.92	49.7217	4.92	-44.6943	4.92	379.778	4.92	1581.53	4.92	482.747	4.92	413.583	4.92	111.083	4.92	-181.306	4.92	193.89	4.92	125.972	4.92	311.194	4.92	401.027		1248	168	298	11434	1626	658
4.93	-3.30566	4.93	-53.417	4.93	394.75	4.93	1541.39	4.93	719.54	4.93	545.39	4.93	121.194	4.93	8.47266	4.93	186.777	4.93	146.639	4.93	320.778	4.93	391.556		661	366	410	27087	1993	1364
4.94	32.7227	4.94	-87.2217	4.94	422.278	4.94	1646.64	4.94	808.407	4.94	781.583	4.94	0.805664	4.94	8.52734	4.94	128.306	4.94	106.027	4.94	338.444	4.94	413.056		723	256	428	23740	3257	2071
4.95	76.4727	4.95	-96.333	4.95	432.778	4.95	1757.17	4.95	832.447	4.95	964.527	4.95	1.05566	4.95	19.2773	4.95	-23.6113	4.95	11.0273	4.95	241.223	4.95	395.64		664	168	564	8919	5996	610
4.96	132.944	4.96	-57.083	4.96	392.86	4.96	1900.56	4.96	925.981	4.96	937.639	4.96	-95.9717	4.96	84.0557	4.96	-22.0273	4.96	15.6104	4.96	290.111	4.96	483.194		1052	278	395	13168	4137	1850
4.97	159.14	4.97	-54.8887	4.97	452.86	4.97	2083.44	4.97	1096.37	4.97	1023.83	4.97	-195	4.97	105.139	4.97	46.1943	4.97	59.916	4.97	366.806	4.97	441.861		781	264	482	14670	2260	1856
4.98	88.4727	4.98	-48.6113	4.98	401.027	4.98	2107.39	4.98	1215.53	4.98	1220.86	4.98	-322.167	4.98	115.333	4.98	-17.667	4.98	28.75	4.98	202.361	4.98	380.917		774	206	1165	7592	3745	980
4.99	81.0557	4.99	6.58398	4.99	362.806	4.99	1608.89	4.99	1212.5	4.99	1404.17	4.99	-42.666	4.99	62.167	4.99	-18.25	4.99	-18.333	4.99	211.166	4.99	357.444		661	209	727	28484	4400	2005
5	98.3897	5	67.6103	5	330.166	5	1521.22	5	903.327	5	1474.81	5	-93.5	5	109.667	5	126.694	5	-18.7227	5	225.5	5	309.694		1164	184	490	16914	2209	2142
5.01	37.0283	5.01	38.1113	5.01	342.223	5.01	1631.36	5.01	1017.28	5.01	745.611	5.01	-97.5273	5.01	220.334	5.01	215.75	5.01	4.44434	5.01	187.39	5.01	264.917		698	370	520	16517	6250	720
5.02	105.833	5.02	-79.75	5.02	300.473	5.02	1673.86	5.02	1175.11	5.02	590.972	5.02	-257.75	5.02	353.64	5.02	219.334	5.02	-33.7773	5.02	197.472	5.02	363.611		1116	184	323	13250	3881	594
5.03	45.8057	5.03	-149.944	5.03	314.306	5.03	1664.39	5.03	1129.48	5.03	734.473	5.03	-449.194	5.03	333.222	5.03	224.277	5.03	-26.834	5.03	240.333	5.03	446.972		1551	164	401	16745	3852	864
5.04	92.833	5.04	-136.334	5.04	339.194	5.04	1731.89	5.04	1072.06	5.04	913.944	5.04	-664.306	5.04	224.639	5.04	152.556	5.04	-30.75	5.04	248.306	5.04	573.333		1076	164	326	13245	15695	2103
5.05	16.9727	5.05	-77.583	5.05	375.667	5.05	1648.67	5.05	1010.45	5.05	952.723	5.05	-621.223	5.05	91.6387	5.05	78.2773	5.05	-11.6396	5.05	207.778	5.05	578.89		732	1208	627	16275	6909	2717
5.06	-85.0557	5.06	-72.9727	5.06	410.5	5.06	1726.06	5.06	1033.83	5.06	962.833	5.06	-678.083	5.06	71.9717	5.06	-56.0557	5.06	-11.5	5.06	135.973	5.06	559.167		837	349	541	37543	5287	964
5.07	-88.5	5.07	-65.417	5.07	377.889	5.07	1609.56	5.07	964.773	5.07	941.334	5.07	-754.778	5.07	74.417	5.07	-151.556	5.07	22.2217	5.07	114.333	5.07	547.028		810	371	361	30237	2559	1989
5.08	-128.111	5.08	-4.80566	5.08	255.223	5.08	1456.78	5.08	987.793	5.08	896	5.08	-763.667	5.08	88.6943	5.08	-173.194	5.08	-83.666	5.08	192.416	5.08	544.417		723	338	493	15414	2873	584
5.09	-332.777	5.09	-205.139	5.09	284.75	5.09	1325	5.09	1071.53	5.09	783.861	5.09	-647.527	5.09	85.3057	5.09	-169.223	5.09	-106.444	5.09	290.556	5.09	516.666		927	219	540	8131	4649	955
5.1	-395.278	5.1	-427.334	5.1	288.223	5.1	1320.81	5.1	1131.89	5.1	778.611	5.1	-450.806	5.1	61.6113	5.1	-200.556	5.1	-33.334	5.1	303.056	5.1	613.806		1613	217	948	10631	6521	979
																									755	199	360	21933	3285	741
																									1370	501	1049	13921	4343	1691
																									687	368	507	14542	2206	1200
																									1348	176	648	16206	5025	1857
																									997	235	689	17606	2614	674
																									1704	444	309	28507	2057	2194
																									1870	423	792	36276	9183	3438
																									997	190	350	10001	2715	718
																									706	161	305	18101	2768	641
																									683	421	460	10727	8243	714
																									951	623	1055	17506	8576	1554
																									1059	744	459	17756	5249	1222
																									836	238	646	36749	5311	894
																									1146	375	342	8357	2606	1461
																									762	175	699	34723	2383	931
																									1640	266	390	17307	2387	2426
																									895	236	665	22035	3659	721
																									1416	276	437	30434	8257	605
																									1307	193	341	31208	3961	3280
																									1117	189	448	28249	9039	926
																									777	187	619	21001	2982	591
																									1021	187	368	11942	7297	580
																									659	187	384	12917	3390	1323
																									713	480	300	30060	4202	1041
																									1283	175	374	26086	9426	1017
																									666	223	361	10972	7462	621
																									663	206	470	16398	3728	596
																									1259	485	586	27150	2024	866
																									661	804	499	25216	5677	2036
																									852	164	367	10297	2040	1137
																									2125	1182	305	28827	2560	593
																									834	205	413	11190	6110	813
																									794	350	581	28406	2006	1638
																									692	279	454	27650	5062	804
																									1457	184	663	16723	3592	1216
																									1022	360	303	29447	5473	1504
																									1285	200	491	10027	4438	1420
																									1095	186	317	10690	5802	585
																									937	506	728	26592	8625	1010
																									1940	235	370	8318	3037	614
																									749	284	374	15018	2251	585
																									656	175	463	20063	2105	995
																									904	268	476	27064	3599	1637
																									1247	356	591	14243	13351	591
																									1290	303	498	19623	5436	1152
																									797	508	656	12150	3858	1998
																									1019	346	411	12449	4726	866
																									722	656	537	10797	8263	582
																									949	409	311	22030	4953	584
																									799	185	407	15803	2158	740
																									1174	250	877	15000	2222	695
																									997	166	679	19751	2108	1900
																									685	451	813	16251	6325	1477
																									1083	196	375	12946	3004	869
																									1817	163	503	28057	8907	935
																									1372	180	479	42423	2254	580
																									2305	450	562	12240	3837	584
																									853	815	666	7947	2743	580
																									954	304	559	15858	6902	628
																									658	647	324	15213	11242	605
																									740	184	324	14313	2705	624
																									792	256	415	32566	2862	576
																									988	175	303	34761	12342	683
																									1027	454	316	18623	9496	619
																									3925	191	787	11949	3247	2802
																									786	267	541	24384	3523	2471
																									711	193	523	19946	2877	598
																									816	685	412	18417	2162	1021
																									989	237	950	16977	6268	945
																									956	179	327	12657	2808	1539
																									689	165	489	11532	7556	1304
																									756	196	419	17805	2622	1343
																									715	207	639	20954	3713	855
																									1220	169	867	30203	3827	586
																									2254	186	357	38867	7682	831
																									1807	278	387	37039	3010	729
																									821	335	425	19609	3588	868
																									907	277	599	13706	2685	1259
																									661	313	311	35669	2252	2565
																									767	221	462	23947	2277	755
																									671	336	336	16455	12620	592
																									993	215	296	14916	5480	968
																									1002	213	611	14841	2284	1832
																									698	198	686	21401	2255	637
																									1348	176	372	9435	2510	653
																									827	183	400	31615	2482	631
																									696	312	442	17316	4295	845
																									1189	235	456	30055	7953	1448
																									722	208	726	19794	2248	2644
																									1275	517	1025	31182	7951	702
																									1116	315	396	15228	8608	653
																									724	443	361	14934	3056	2400
																									931	200	441	21999	5282	1020
																									739	220	368	10791	2080	1890
																									1798	292	596	15931	2864	588
																									1407	178	837	10187	2905	3606
																									5364	411	598	26463	2416	657
																									873	676	570	14904	5112	1986
																									736	165	676	7599	4142	603
																									1763	164	575	33830	5195	1142
																									659	412	360	35859	2379	756
																									760	428	397	21936	5168	778
																									1155	384	628	15903	2463	924
																									670	213	743	22178	2184	580
																									974	161	407	17233	2486	2044
																									1246	226	1225	21579	2905	2618
																									858	260	305	13290	2158	1562
																									2163	218	632	7810	8691	698
																									878	198	770	13423	3386	851
																									1325	229	325	22403	6067	661
																									1095	301	677	36083	2305	1349
																									1028	162	296	10865	4368	1577
																									656	299	1147	19490	2676	1007
																									1069	244	608	25443	3312	1729
																									1523	298	433	15475	8184	1173
																									1238	161	296	26572	2617	612
																									847	381	321	7827	3175	931
																									3821	199	360	30045	2818	2150
																									703	232	345	22323	4113	730
																									722	316	318	13010	2939	1196
																									672	251	629	22901	5610	1144
																									716	220	347	11366	4249	2785
																									1189	360	380	20663	3569	918
																									1114	216	329	26882	5360	1280
																									2568	227	302	21824	4125	853
																									1309	207	520	23159	3029	3007
																									782	279	562	32914	2884	760
																									849	585	964	19201	4391	846
																									709	391	494	13801	4327	1827
																									710	183	570	9202	5879	946
																									2910	251	993	16508	6151	719
																									751	190	772	15767	9427	3687
																									1675	171	782	16958	4455	2193
																									1816	329	555	19796	12602	965
																									2981	243	344	20904	6521	619
																									946	213	428	16102	2768	1042
																									698	163	344	22203	4172	3229
																									2995	194	313	27477	2893	636
																									1207	197	609	20276	2295	945
																									658	178	518	42558	4047	567
																									1150	792	537	30163	6891	990
																									937	202	592	18678	3811	563
																									1217	220	379	23608	5578	775
																									714	371	366	16509	3658	591
																									1061	658	591	13678	2993	598
																									803	164	409	9957	2098	751
																									1029	179	740	18256	6236	659
																									1235	160	354	12472	3934	823
																									2306	242	327	17466	2856	1400
																									3002	218	307	10277	4426	1397
																									909	280	328	11449	7349	1291
																									795	269	308	17579	7582	696
																									1245	372	536	9792	2177	766
																									922	272	301	9742	4906	1379
																									660	663	406	25143	2313	615
																									690	305	420	8383	2523	1345
																									934	254	582	32914	2407	1623
																									761	279	650	25238	2980	681
																									1132	393	1043	29642	2613	1273
																									847	203	305	31153	2439	1026
																									659	285	315	7646	2708	730
																									770	281	450	16929	2784	1016
																									735	221	711	7834	2368	1714
																									1143	161	364	9829	6188	2237
																									1239	163	323	30633	6970	1761
																									1010	207	350	28361	4593	728
																									774	161	1037	20182	2854	1020
																									1135	209	456	23638	7199	1042
																									701	249	558	20664	2652	684
																									1286	210	817	18538	2027	635
																									766	544	924	28365	5264	1217
																									1059	175	610	14392	3844	738
																									1152	170	448	25934	2238	686
																									796	1275	313	11992	2931	589
																									1135	212	299	12663	3138	1311
																									2991	176	591	18336	3496	1118
																									710	163	303	7928	6705	744
																									1188	406	511	12022	4530	604
																									1047	271	564	21018	4434	777
																									1020	362	374	35141	6152	959
																									3539	168	492	25461	2687	1290
																									710	164	351	17152	2687	875
																									1121	244	342	26046	8501	812
																									983	176	315	22955	4100	749
																									1203	422	299	30745	5855	2823
																									978	623	817	19785	4396	978
																									1049	190	319	11032	3639	1530
																									959	216	953	9599	4736	639
																									728	171	357	26291	16385	779
																									662	224	725	19968	2343	645
																									3002	285	312	13885	7490	689
																									665	173	1539	11893	5811	625
																									778	190	480	18364	9673	774
																									1381	261	312	7918	4118	1062
																									1047	188	698	13030	2640	565
																									1456	174	403	15668	7077	775
																									913	263	322	18362	2889	583
																									687	277	309	20486	3884	960
																									1098	180	382	25351	3174	1496
																									756	194	579	16503	2592	689
																									1077	379	442	36931	4193	1422
																									1212	160	664	19548	3817	3905
																									866	275	629	10933	7282	815
																									881	194	338	21055	2898	1035
																									1133	173	628	22209	3180	907
																									836	196	545	15135	6092	2494
																									793	197	429	17382	2484	1798
																									1181	168	449	30813	11479	1500
																									902	232	310	12639	2838	572
																									658	227	1177	25586	3936	641
																									872	218	666	15475	2117	644
																									919	1085	573	14448	2464	719
																									1022	161	538	24767	2124	2944
																									966	252	903	20712	2808	1286
																									779	304	1179	20295	2204	735
																									1131	208	316	18181	6109	772
																									911	174	373	19126	2303	602
																									1105	168	563	12679	4050	880
																									1691	384	350	8266	5905	1010
																									855	167	724	13964	10653	3182
																									778	166	375	22377	3014	649
																									1578	224	316	9888	3130	2122
																									2901	236	358	25501	1994	759
																									1368	421	450	25222	4655	722
																									713	241	376	9500	2506	1440
																									1070	250	885	24790	6531	1063
																									1110	362	443	19826	2684	861
																									791	198	381	19731	2474	937
																									1007	211	311	7588	6336	865
																									1503	364	382	14931	2130	581
																									856	381	463	13804	2358	690
																									1762	230	431	38875	4687	1148
																									1439	225	320	13051	4893	1362
																									1514	196	314	8849	6293	1219
																									1387	250	302	14817	4366	1864
																									2035	251	757	21300	3053	1352
																									878	189	323	13415	7295	1251
																									932	270	702	16589	7786	608
																									722	175	797	17618	3521	2341
																									1014	300	338	24896	3113	583
																									1143	162	329	15644	9224	2305
																									1689	433	346	21348	8992	1166
																									660	353	492	18392	2685	698
																									947	314	549	10177	3462	725
																									1439	193	310	10082	2043	616
																									740	305	485	18281	2907	988
																									1155	191	327	32382	2028	1955
																									682	206	411	25182	3987	1798
																									1354	187	428	18943	7849	1271
																									709	272	620	22906	3302	1007
																									717	224	433	22207	2077	1088
																									981	411	745	16038	2371	2068
																									1022	169	382	20931	12410	753
																									1043	250	402	12358	11220	662
																									706	455	362	35465	3855	1451
																									1012	170	414	12363	4571	1369
																									1474	393	1326	16016	5345	647
																									822	272	1167	30708	2670	817
																									1181	207	448	9566	2395	1354
																									1075	218	377	22721	4569	1336
																									2142	163	446	7227	3721	681
																									1004	683	443	11926	5721	703
																									1078	181	361	20143	2008	1413
																									1045	182	325	23078	7071	1785
																									1336	260	393	8640	8650	1599
																									1652	296	594	13814	3344	595
																									949	206	313	14736	5940	733
																									1392	198	641	16240	2496	1411
																									2407	187	355	7363	2651	792
																									1242	172	784	18242	4333	1080
																									679	228	451	24545	2486	565
																									1000	175	518	7743	3460	1021
																									1254	432	619	12760	5367	1279
																									729	218	494	38372	2982	1439
																									1271	197	595	8457	4308	1435
																									903	253	420	9573	2334	835
																									1599	161	652	16478	3957	848
																									1231	177	384	9257	5286	702
																									1274	307	838	9316	2362	1304
																									831	178	330	11669	7385	603
																									1520	178	420	11006	5405	901
																									1156	223	416	19750	3962	1373
																									1252	224	342	28296	4831	1021
																									976	199	325	17083	4285	2154
																									661	176	642	10859	3355	614
																									1612	160	801	18833	11829	1060
																									935	269	496	18761	2976	565
																									911	253	320	7351	6621	781
																									1349	230	868	28947	5034	1033
																									1046	445	547	18250	4126	3379
																									1207	180	309	21772	5077	679
																									1064	254	333	24455	3263	1213
																									916	164	415	16980	3811	1313
																									728	230	350	13710	2576	679
																									742	214	650	16094	2045	1947
																									1769	165	414	16773	3394	2251
																									1014	248	371	16207	2143	1766
																									1374	174	625	18269	9950	644
																									1115	1244	363	13144	3340	1100
																									732	399	602	17491	7041	1279
																									862	239	474	20649	3303	729
																									974	238	655	31011	7293	1222
																									1133	172	438	14707	3445	677
																									1537	319	499	21521	3780	1665
																									874	276	724	10145	5391	1390
																									704	382	429	18482	2114	715
																									942	183	802	24119	3391	1173
																									784	225	1189	14909	3727	620
																									827	467	384	7550	2706	599
																									758	365	460	13387	2829	1071
																									1642	349	545	11936	2229	770
																									1115	231	321	15287	2775	1531
																									1574	162	661	13983	5866	1753
																									1680	242	501	21604	2603	667
																									984	185	447	15566	9867	1955
																									950	203	326	19810	6320	754
																									820	510	731	7294	2606	1323
																									1480	180	752	23746	2195	638
																									843	192	793	11079	2747	1546
																									1046	230	555	10375	2243	1136
																									719	213	348	19513	5678	585
																									799	272	330	8337	9035	1308
																									679	213	301	28230	3425	2722
																									2282	247	390	19577	5089	828
																									987	286	348	18492	6132	826
																									1119	167	422	21281	2955	899
																									666	217	758	9834	3754	743
																									1468	167	594	8761	4401	622
																									1331	532	425	12952	3582	629
																									1139	263	542	28672	2680	1955
																									773	239	363	32910	4856	912
																									943	193	377	9399	2029	1734
																									706	225	635	10116	2276	812
																									1179	171	378	21586	2689	883
																									728	199	331	11374	2571	1800
																									664	217	298	17679	3960	1563
																									1762	536	541	13087	3455	677
																									1477	269	423	11042	7008	767
																									752	186	563	18429	3016	660
																									869	162	1029	19030	8346	586
																									822	294	404	25813	2961	1213
																									1112	283	522	11939	5434	966
																									685	191	606	8456	5350	647
																									1092	182	409	9367	2991	1130
																									1805	169	459	13621	3382	1286
																									738	425	341	10939	3344	1077
																									667	231	563	12107	4194	1610
																									1555	206	296	10430	3312	1681
																									994	209	334	7620	2132	1349
																									1198	204	583	19389	4583	1898
																									753	317	809	18464	2506	893
																									766	180	344	34373	2324	912
																									873	197	868	18095	2759	1332
																									1230	204	849	17878	7682	775
																									794	317	386	10909	8777	662
																									1976	353	521	15249	3308	916
																									1113	232	442	14464	4537	783
																									978	164	415	10969	5836	864
																									1299	244	364	11233	2625	2703
																									1811	237	1086	9119	5642	643
																									1361	536	437	18705	2181	779
																									788	346	480	15371	2081	697
																									1917	428	375	14533	2097	731
																									1068	310	1090	16172	2177	593
																									854	160	411	11168	3432	931
																									1508	232	315	14140	3976	596
																									877	182	638	10964	2355	967
																									1144	209	581	8432	2047	749
																									1466	720	340	22923	7231	1998
																									2657	190	388	9466	7014	588
																									1465	346	992	24160	2183	2366
																									668	533	525	8316	11004	1836
																									1779	270	419	9449	2097	1043
																									782	370	849	8369	5170	627
																									1991	160	615	27077	3078	1830
																									683	323	305	10954	2883	842
																									715	178	361	27770	2161	826
																									759	176	386	28194	2341	1470
																									1402	420	515	11563	4019	1414
																									887	297	592	42975	7849	2677
																									694	268	332	19424	2072	627
																									1263	294	475	21072	4270	564
																									1184	165	485	19093	4846	679
																									2366	246	300	20817	2200	908
																									2217	186	700	47196	2269	588
																									921	201	328	22105	4207	1177
																									1557	620	407	16953	2734	1312
																									692	175	366	25496	5064	814
																									880	214	453	17722	4249	913
																									1544	411	553	11384	6134	1224
																									785	198	521	28222	3772	845
																									1759	305	414	25364	2522	1395
																									1364	220	424	31918	3073	1050
																									803	528	820	8716	2350	583
																									660	262	1089	10904	2058	734
																									1116	573	608	22304	4498	806
																									891	315	297	16849	2441	946
																									1711	678	385	8127	3333	822
																									2028	512	319	22475	3385	745
																									1555	685	420	14142	2719	613
																									1129	190	445	14900	2029	634
																									929	171	636	28417	3444	1173
																									815	174	443	7211	2520	1474
																									933	287	331	15199	3047	637
																									1368	164	297	23037	2643	1941
																									1461	206	611	12618	4006	993
																									968	209	519	23169	2479	1265
																									911	365	348	13679	6153	1595
																									1153	207	376	13905	6309	582
																									935	297	512	30722	4033	564
																									676	175	331	15083	10464	1712
																									887	182	604	28685	8020	886
																									1653	187	341	45963	2295	1166
																									2391	324	305	33163	2045	1000
																									4485	717	317	8166	4062	998
																									750	225	297	16513	4345	1736
																									1419	205	414	16381	2106	743
																									717	262	6295	13363	7383	761
																									1970	175	658	39595	3006	738
																									766	167	404	40916	3347	1324
																									734	500	334	11165	5330	593
																									1772	216	805	17261	7398	1046
																									682	569	327	17697	9445	664
																									698	188	528	18152	2515	886
																									2404	174	589	7611	7169	2731
																									1243	266	968	10565	5611	718
																									1779	231	1031	9517	3168	585
																									735	162	562	29184	7201	764
																									989	228	486	22765	3736	1194
																									848	410	476	14810	3218	1770
																									968	202	825	31057	4920	1886
																									1502	282	303	14696	2252	599
																									829	194	402	29841	9157	937
																									1633	279	1234	10682	2054	691
																									1813	240	608	9255	9792	1614
																									700	177	431	15059	3350	575
																									766	170	914	20416	3344	2867
																									1022	177	439	17461	6376	1041
																									889	1551	1018	23011	2112	749
																									1429	174	386	16742	3349	1704
																									1549	271	434	17676	6517	741
																									744	286	333	17284	4302	569
																									723	219	562	31065	4702	965
																									782	187	379	11218	4208	1228
																									1621	356	374	18285	2027	1792
																									666	438	412	18985	5392	4400
																									754	702	333	12500	2667	1904
																									1155	211	521	24480	4285	1003
																									1068	950	597	20454	2767	798
																									840	204	462	17804	3166	799
																									868	267	352	18096	2484	721
																									1524	256	302	30477	2141	564
																									818	592	304	19872	7211	564
																									1356	205	371	16256	2545	1117
																									707	248	661	33275	6759	2395
																									850	164	799	13334	2296	2084
																									2149	241	611	13032	4753	1214
																									1074	189	604	22800	2165	1543
																									1140	373	528	35673	2143	1916
																									788	213	611	7824	6915	837
																									825	468	346	18825	7282	942
																									1147	197	702	8786	2091	1683
																									1377	196	323	17532	6069	1262
																									1234	608	437	31908	2715	1414
																									778	414	303	26692	7369	1648
																									1127	203	607	34217	4685	796
																									677	455	445	8209	2924	1826
																									1238	240	339	27202	5022	644
																									748	179	903	26268	3104	596
																									1263	286	493	31908	2167	995
																									1348	224	837	13055	1999	611
																									731	281	328	21899	3235	2193
																									1765	341	470	15673	2554	2471
																									1249	257	417	30658	5364	993
																									1130	170	782	11395	8566	761
																									899	233	775	27272	3539	800
																									878	171	697	12018	2308	1385
																									703	203	379	27403	4023	1270
																									1984	308	452	12664	2207	567
																									899	174	876	27529	2209	750
																									663	369	874	32297	4538	2419
																									757	219	361	8835	4251	640
																									675	188	296	21768	5616	631
																									1193	182	393	10616	5987	897
																									945	231	433	31163	3264	1042
																									706	266	318	37525	3393	1587
																									822	174	504	20465	3070	1824
																									776	577	339	18969	2134	1146
																									718	200	407	31430	3914	944
																									769	556	593	19589	3690	764
																									787	596	350	19750	3929	736
																									1178	604	360	13250	5531	1857
																									943	343	372	15631	5703	563
																									1067	262	358	26237	3758	1824
																									1360	233	420	15732	2427	567
																									1549	209	307	21413	2546	918
																									1226	639	474	18167	4894	811
																									728	211	778	11967	2737	990
																									1741	381	332	28788	2467	967
																									888	242	602	29648	2675	608
																									687	195	920	24724	3137	1547
																									1242	216	562	14785	9386	952
																									1136	260	403	27253	2326	922
																									858	212	921	25189	2483	590
																									868	193	422	25124	9298	1803
																									863	169	987	29086	6101	698
																									1044	180	388	15245	2163	581
																									885	240	428	25022	11383	1120
																									1990	1062	310	39908	2085	591
																									987	196	605	32610	2615	1943
																									997	177	778	8310	4052	635
																									749	208	412	12400	2055	1372
																									994	238	1238	25964	8665	738
																									730	168	309	9944	2262	722
																									1068	177	519	23500	12752	624
																									1052	314	381	42247	2902	715
																									990	643	305	8673	3713	586
																									1340	194	579	26818	4281	785
																									955	167	752	12431	2535	909
																									822	217	997	31812	2463	805
																									734	243	545	25353	5579	854
																									1632	231	518	8005	2428	760
																									728	219	573	14244	10937	695
																									1143	245	508	10906	2998	1617
																									986	168	419	26681	9151	2410
																									965	268	963	23243	8948	890
																									1166	256	766	29777	4246	2725
																									1257	249	547	29337	9384	1273
																									1118	435	532	21792	4615	656
																									1472	285	660	18043	6846	620
																									1130	164	340	31557	2049	573
																									681	206	423	17703	4115	579
																									957	173	349	32253	4884	974
																									1438	202	336	34919	2290	634
																									665	186	531	13255	2911	954
																									1475	267	606	15591	7520	1219
																									680	193	324	19356	2458	817
																									1964	165	482	9283	2814	649
																									1541	247	484	13886	2000	2803
																									1659	264	572	25575	5448	1298
																									936	161	296	9518	6101	1063
																									900	301	355	27545	2928	2757
																									742	195	843	23689	2692	675
																									761	194	412	14703	5402	941
																									952	296	423	7985	2894	603
																									1777	226	362	18683	2188	2597
																									1279	203	576	24173	2819	1237
																									739	206	923	19560	3471	582
																									971	168	649	20886	2877	1174
																									710	390	349	29283	5069	598
																									754	364	474	24058	3322	597
																									797	261	309	13509	3203	1130
																									1002	160	490	28727	2351	3265
																									1538	248	335	34467	2466	711
																									848	189	342	30097	3046	734
																									845	220	309	24116	3513	1644
																									992	214	675	27365	2519	602
																									672	234	544	12511	3170	1417
																									1539	169	483	17080	7281	1277
																									894	164	308	24949	4421	1013
																									1111	420	599	27373	3963	4051
																									2630	248	461	12678	3555	1040
																									1325	168	619	10526	5372	864
																									1111	168	731	17404	3451	2261
																									1448	249	361	19771	2315	1189
																									749	245	582	28362	2480	619
																									1362	182	497	25911	5615	738
																									734	241	421	7426	2146	618
																									1362	617	578	20447	2969	568
																									1123	254	432	32717	2117	638
																									777	411	366	38939	2779	2500
																									907	308	461	9525	8536	1440
																									725	189	408	22024	9049	675
																									1201	185	522	15009	5343	1441
																									1690	548	379	27790	2446	688
																									781	293	888	33330	2999	2792
																									1336	636	479	8354	3106	1587
																									1153	234	527	7349	2559	672
																									1128	196	341	24503	2519	1126
																									671	177	499	12384	11187	725
																									1348	177	396	31967	6382	712
																									1107	299	345	23102	3157	1029
																									709	164	410	23642	6151	774
																									890	403	860	7808	2184	2530
																									747	172	442	26137	6317	677
																									854	177	432	25234	4456	568
																									1273	260	596	25406	3649	886
																									2657	310	367	13016	2720	661
																									958	265	1211	26498	2422	579
																									981	222	373	12072	4505	668
																									1064	188	372	12854	4545	780
																									731	278	718	22639	3318	726
																									1418	171	455	16374	4796	1988
																									2358	160	330	10070	11519	624
																									881	964	339	28062	2322	903
																									1536	314	338	36924	2037	651
																									786	510	323	34050	6881	590
																									1020	171	797	14381	7398	588
																									2114	238	807	19358	2513	683
																									862	210	753	22943	2248	767
																									1171	200	703	18009	7472	614
																									964	195	907	16876	11794	621
																									1177	202	316	54038	5736	604
																									1165	215	491	34291	2575	734
																									1779	450	470	28722	4579	804
																									718	488	412	14663	2583	819
																									831	178	631	26305	3697	572
																									753	264	424	32988	4264	622
																									781	299	477	19629	5493	977
																									671	377	430	29978	2605	1529
																									819	252	442	11944	6959	670
																									1466	174	474	7341	2756	868
																									929	202	486	25784	8532	1093
																									1337	188	465	21887	2229	1802
																									1564	309	879	23572	9520	599
																									1394	298	350	28092	6398	663
																									836	191	1133	17866	2063	1192
																									827	163	327	24263	2572	1139
																									1054	553	567	23366	2315	1559
																									671	715	400	14577	7163	1268
																									756	214	519	12172	4029	818
																									993	179	437	7243	3238	643
																									1463	300	1061	24904	5757	1888
																									814	174	769	12259	3363	1857
																									891	250	453	20417	4609	3905
																									857	264	633	28919	2342	596
																									677	657	536	28546	2141	1155
																									691	169	541	36222	4577	1542
																									1042	160	410	27334	6878	580
																									845	165	374	21160	3462	6275
																									697	320	331	23454	8596	712
																									726	209	777	18856	2423	1620
																									888	246	396	8580	2183	1928
																									1827	278	417	33861	3335	719
																									1668	393	628	27460	2190	882
																									1502	277	380	21569	6658	1559
																									1422	202	327	17941	4219	571
																									1348	195	415	13876	3984	642
																									1207	200	363	8323	2307	913
																									712	207	519	25092	7623	1382
																									660	248	335	15609	3354	967
																									1278	228	502	24378	12702	634
																									1041	217	339	29500	4408	1070
																									671	224	520	8312	5712	671
																									1444	180	306	7955	4773	588
																									693	391	570	13713	2016	830
																									916	537	934	26880	2404	843
																									1076	194	750	8912	2641	1809
																									738	279	393	21654	2084	1243
																									715	231	667	24438	2488	595
																									1078	301	374	32388	8399	1555
																									937	216	433	38946	4372	880
																									1066	203	597	18641	3036	855
																									889	239	338	15406	3611	1379
																									934	166	448	24415	3119	613
																									664	217	516	20954	3628	2204
																									1161	707	309	21604	2578	1138
																									864	226	317	20950	3337	1251
																									751	333	438	10881	5489	960
																									1136	178	354	29773	3738	1831
																									955	257	840	27039	5361	1414
																									1191	176	352	34719	2505	782
																									676	238	518	15505	2609	1028
																									798	213	327	21223	3441	601
																									763	292	345	13065	5530	6168
																									764	168	841	12344	3620	847
																									906	174	322	26897	3023	1592
																									698	251	608	17347	9115	1482
																									993	268	315	7434	2783	1074
																									1017	238	367	19314	5033	636
																									1531	210	328	33609	3855	1770
																									2155	170	613	9047	3535	716
																									1358	293	764	28612	5554	931
																									848	235	407	12812	5032	730
																									754	191	526	19554	3120	1189
																									658	247	327	25123	2128	1252
																									1003	284	312	28960	2118	774
																									772	319	660	22402	5236	677
																									717	209	310	19182	7191	1774
																									950	385	408	29930	4613	1513
																									996	201	381	18044	4028	853
																									1135	227	459	11246	5741	784
																									1314	267	475	26024	2043	574
																									832	344	587	15180	3351	777
																									766	727	412	11850	2293	710
																									2472	274	379	12300	5530	631
																									710	661	542	11233	4981	752
																									1404	274	591	20342	4680	884
																									772	210	882	8704	2488	1477
																									1259	224	334	18492	4176	570
																									919	264	506	28744	4329	1629
																									1099	411	784	25707	5410	599
																									755	271	460	22508	1997	598
																									789	164	393	26596	2163	1966
																									800	174	446	25373	6392	1549
																									1058	191	492	46645	5777	719
																									798	281	321	23006	4452	1398
																									693	331	1226	23719	3180	1068
																									1055	216	312	21854	2264	661
																									792	732	527	33307	2143	1981
																									679	757	748	26128	2436	866
																									2770	162	343	24523	2457	1071
																									900	559	423	9345	2850	815
																									850	690	1174	22930	2166	662
																									938	182	317	24663	4736	1255
																									1205	306	297	39198	2358	1399
																									950	193	541	9974	2159	1046
																									926	210	555	13998	2520	981
																									788	202	473	14208	2242	572
																									1140	400	405	13413	2490	1361
																									912	173	853	25988	2048	1102
																									984	283	299	31979	3364	755
																									890	245	423	23006	2048	1268
																									1425	242	403	11405	2859	689
																									658	462	636	17283	2439	689
																									809	193	301	17691	2009	775
																									1080	241	361	15458	4703	862
																									789	207	765	8143	10112	676
																									899	316	572	11614	3254	1693
																									894	198	459	21892	2742	1036
																									738	454	593	23588	2284	711
																									902	368	820	22580	7901	1030
																									1920	164	472	49738	2862	657
																									675	177	718	16542	2834	2974
																									832	710	493	30211	3586	584
																									694	175	786	20819	2557	842
																									1083	168	438	7685	12517	2529
																									772	206	526	14141	2809	1828
																									1459	336	690	19455	5734	734
																									1485	722	407	12020	2021	896
																									691	196	329	19201	2558	2006
																									907	170	392	26648	3222	2350
																									962	196	838	9653	3822	663
																									1506	178	642	17292	2197	787
																									2416	211	627	22447	3580	1032
																									700	904	496	29551	6766	1485
																									815	401	332	19573	2441	614
																									1064	172	486	26543	3236	825
																									1290	261	471	8492	6719	794
																									1080	244	448	23812	8024	952
																									1332	264	600	19542	3230	1396
																									893	279	522	12463	4379	1195
																									1092	380	556	19887	2480	893
																									1193	198	336	24058	2157	837
																									983	348	1080	7954	5964	2025
																									1426	178	535	21086	5033	909
																									724	170	493	28640	5184	704
																									778	188	333	26272	2891	1597
																									733	169	504	21902	2228	1426
																									1016	340	1474	22417	2130	587
																									1855	229	521	14506	3716	804
																									775	199	451	39632	3536	790
																									1249	205	711	23052	3173	992
																									910	216	498	22220	3499	1018
																									670	290	355	30317	2209	817
																									1120	194	563	18735	4573	2248
																									2757	338	669	11864	2406	1357
																									1861	241	521	25048	2649	950
																									1080	232	1253	17770	4685	917
																									4302	484	307	13789	4648	768
																									1082	543	409	23452	2518	584
																									1280	225	319	32580	3396	2004
																									1181	197	321	19597	3672	755
																									1236	171	322	25900	2627	582
																									1625	204	620	12045	2548	1109
																									1118	232	323	10870	3861	1556
																									705	202	469	36648	10905	691
																									941	160	327	24363	2367	1078
																									936	348	861	16705	9520	1110
																									908	164	456	16812	3645	726
																									1087	191	647	7972	6060	622
																									876	260	377	16314	2141	1162
																									703	174	381	23464	8366	706
																									710	578	585	21763	2658	1059
																									660	184	593	10269	4635	682
																									782	176	339	24462	3881	1651
																									873	340	616	16053	3296	1066
																									853	202	581	17145	3340	695
																									1078	185	329	21150	7422	807
																									1135	170	499	21758	6789	1996
																									888	238	885	24679	2812	1665
																									1080	325	396	32602	2362	646
																									853	267	615	19731	6743	612
																									991	233	362	21269	4352	1235
																									2332	165	523	22464	2474	850
																									697	179	514	32887	3008	596
																									693	169	437	18015	2445	788
																									869	197	339	16422	7703	1857
																									656	222	344	10022	2842	1615
																									763	312	324	26680	2596	672
																									847	190	388	20153	2538	571
																									1639	243	394	19606	7200	1605
																									887	234	692	17232	4829	780
																									1139	190	794	34012	4512	1042
																									840	343	340	27843	2122	697
																									2216	347	539	27067	2035	1318
																									955	229	489	28233	4681	1036
																									1123	242	337	28484	7219	1491
																									1311	284	347	23846	3032	619
																									1052	250	306	33170	2853	786
																									1494	269	453	8284	2048	859
																									978	310	374	10134	5147	967
																									909	162	1028	20671	5413	814
																									1192	217	472	25749	2019	779
																									711	165	332	30404	2356	1045
																									1056	190	877	28872	3513	2079
																									906	208	429	21060	4000	723
																									762	257	645	22691	7766	787
																									670	199	412	10825	4510	1725
																									1229	258	370	19550	2058	1309
																									680	291	307	13730	5053	833
																									3115	216	482	14714	6669	1116
																									2780	261	597	9286	3621	1275
																									969	263	345	25962	2449	1167
																									1511	336	312	28573	5159	2768
																									1372	162	635	10086	4235	624
																									914	254	504	19146	5698	615
																									828	221	911	24123	4302	611
																									1535	229	342	18319	2619	749
																									1252	273	441	19399	2530	568
																									1128	172	509	19992	6210	648
																									804	210	784	8400	6847	1403
																									843	210	324	17432	5303	1160
																									737	221	347	13921	12867	580
																									1120	170	306	19263	4545	3399
																									719	168	489	19570	2142	690
																									664	271	578	39202	3532	814
																									706	164	429	35502	2194	598
																									709	163	487	16092	3120	897
																									887	197	664	31263	2437	578
																									1345	358	717	11071	2121	621
																									1314	188	357	22116	2318	698
																									1048	235	571	11310	4141	821
																									1065	232	458	32270	2304	678
																									678	281	299	10644	2829	1134
																									2919	197	516	7873	3116	619
																									751	213	354	29635	3470	1386
																									766	179	594	36110	4815	1178
																									754	438	467	24848	3041	3065
																									1333	357	346	34883	5179	977
																									1289	335	340	25292	3290	1221
																									1032	163	719	19070	3110	975
																									921	188	406	29645	2070	750
																									2424	169	683	19862	2943	1169
																									711	279	878	31704	3503	1432
																									749	272	310	8382	3162	1397
																									696	226	516	15044	4966	1723
																									891	513	338	32739	2785	3054
																									675	187	425	13970	11109	2487
																									1111	172	302	30262	4475	571
																									1761	305	481	27854	3007	811
																									1599	179	621	28736	2064	704
																									1277	231	506	14507	2137	1283
																									956	478	610	21374	2146	694
																									1122	444	438	26152	4768	581
																									754	192	425	16057	2200	800
																									735	394	705	22943	3679	684
																									903	367	453	28169	7895	811
																									1051	161	598	31007	2598	567
																									2746	394	301	10856	2407	737
																									2925	172	782	16843	6166	1433
																									944	318	539	21080	3347	1263
																									930	173	501	16015	6724	779
																									1500	184	722	12044	2658	620
																									1138	210	429	24747	4635	772
																									1089	220	527	9305	2826	820
																									743	219	340	23129	3577	1412
																									889	213	735	10763	2403	2618
																									723	247	425	8605	4027	659
																									1208	274	350	8306	3092	767
																									964	247	378	10453	6600	990
																									903	200	449	10115	5148	1806
																									815	172	422	10828	3895	1004
																									1375	379	779	27991	3519	860
																									687	272	367	22630	4817	613
																									926	323	736	10168	5155	1802
																									852	245	712	21515	2220	724
																									674	240	938	16776	3112	717
																									828	247	306	10663	2028	1927
																									818	325	468	22493	2516	569
																									1007	183	329	28466	5615	1409
																									737	198	322	21735	2626	1285
																									669	185	411	27056	4196	702
																									1063	205	468	14878	2657	1999
																									1539	194	315	19543	4000	641
																									1348	162	490	18877	10907	599
																									842	314	1006	21683	5030	1767
																									719	216	511	35454	2989	727
																									911	214	406	20686	2760	871
																									774	165	321	22083	4595	881
																									804	569	498	14876	3460	618
																									1623	172	428	11168	3866	1035
																									1041	199	334	11728	4496	698
																									1606	171	349	28468	6604	1139
																									708	333	502	10634	3985	1718
																									1605	231	426	14695	3518	645
																									1198	205	551	19351	2854	1094
																									823	173	373	29350	4291	1343
																									1512	186	936	12628	3070	939
																									1082	218	354	12788	2276	1131
																									900	165	1293	28281	2857	715
																									772	291	892	8159	2255	688
																									674	172	858	16334	3180	2093
																									656	202	1845	20779	9141	1057
																									793	161	366	22928	2120	611
																									674	171	364	11425	3265	840
																									976	220	487	20308	2468	695
																									771	160	345	12603	2026	587
																									815	259	531	11373	3185	1099
																									1217	196	400	17346	6504	927
																									814	191	369	14053	4332	2640
																									983	236	350	25763	2468	1954
																									1113	288	486	22473	4758	571
																									2372	223	624	10354	3353	934
																									2502	284	445	13036	3517	625
																									815	451	447	15395	2555	909
																									663	261	487	14905	2327	1006
																									787	165	472	11095	2710	891
																									895	210	668	23621	2628	1007
																									1644	255	414	8776	6715	789
																									977	254	316	7967	2714	1411
																									2018	217	573	16209	5391	2041
																									682	602	323	8591	2008	631
																									746	400	307	10803	2490	972
																									1371	312	587	18464	4866	1185
																									2516	450	802	15244	10283	937
																									695	199	509	15472	8922	772
																									794	184	586	8220	8224	756
																									1030	242	381	7925	4197	599
																									1313	182	659	17666	3348	734
																									732	276	554	8594	2206	565
																									757	415	489	8290	3773	782
																									1002	876	477		2762	1050
																									1140	170	475		2194	616
																									689	184	309		10156	1217
																									1286	210	315		5331	1280
																									1580	181	317		3256	589
																									1212	220	303		2011	2247
																									791	660	395		8612	1235
																									948	287	377		8016	1880
																									694	210	608		6591	600
																									827	432	919		2266	1505
																									980	265	497		2020	1466
																									847	863	402		8377	827
																									749	660	970		2515	4001
																									1217	178	335		3093	720
																									983	178	1461		3378	894
																									809	359	869		2788	1563
																									928	187	296		2463	645
																									753	169	314		9694	1152
																									1050	323	343		3466	808
																									778	323	466		4058	620
																									754	170	339		6075	683
																									983	242	523		5467	3866
																									760	582	837		3835	579
																									708	524	480		5513	754
																									813	258	467		2587	1524
																									1617	378	313		2274	1019
																									1284	188	577		2713	847
																									806	206	325		2396	592
																									849	269	477		8063	732
																									1001	179	314		3145	628
																									948	618	853		6841	801
																									691	175	409		6744	856
																									1158	204	620		4341	816
																									854	163	306		7150	716
																									692	211	505		2733	1448
																									754	288	389		2407	1212
																									1296	220	412		7288	603
																									1666	169	824		6275	708
																									920	186	371		5540	727
																									667	169	379		2909	567
																									1135	164	464		2973	1261
																									2364	345	884		2207	759
																									1432	253	350		7032	569
																									1023	255	488		3533	788
																									837	193	368		7034	1176
																									1336	423	423		5343	642
																									894	165	410		11307	649
																									695	284	509		3754	879
																									1020	184	331		6060	1055
																									1107	364	462		6994	809
																									1085	224	541		5795	1012
																									709	245	549		6898	915
																									985	380	379		4092	566
																									1273	212	542		6599	780
																									940	328	540		2128	3669
																									698	1070	1148		4760	2572
																									970	161	547		3116	2850
																									1819	334	552		9351	1006
																									861	485	313		2207	1096
																									856	197	376		3526	590
																									854	408	465		6997	578
																									657	343	544		3467	660
																									764	236	361		3846	1227
																									2393	178	572		9989	646
																									800	214	383		8163	617
																									751	187	799		2086	1771
																									693	182	416		2779	1048
																									1438	297	337		4703	1915
																									1068	172	444		2071	998
																									667	340	317		2492	2307
																									1543	670	468		2674	600
																									765	226	635		2291	945
																									913	335	520		3111	2275
																									1582	305	521		2068	657
																									1499	199	384		5232	1499
																									785	244	360		2598	1015
																									1401	321	687		2122	567
																									796	301	357		8092	581
																									657	217	323		4336	1260
																									781	265	456		2255	689
																									1676	340	1496		6261	1403
																									2288	224	414		3524	1175
																									786	197	393		3001	1646
																									1186	207	1068		9062	1118
																									726	237	452		3112	921
																									1043	252	416		3041	7179
																									914	246	526		4135	1909
																									1272	265	712		2365	607
																									876	170	442		5399	1448
																									1001	214	316		2667	1660
																									1332	307	299		6273	758
																									658	527	708		3429	1330
																									1015	265	475		7424	629
																									1702	237	607		2416	777
																									834	242	435		6885	1203
																									1232	383	431		3310	1529
																									1121	207	438		2181	1519
																									765	225	414		7373	1017
																									827	318	344		2522	861
																									927	414	551		4758	880
																									1253	291	665		4002	983
																									1245	253	341		2119	808
																									1512	160	1055		2984	813
																									721	197	362		2627	563
																									1080	217	584		7318	1304
																									1541	227	353		3011	1681
																									694	230	346		2056	1608
																									715	208	547		2629	2158
																									940	196	671		4068	1853
																									916	170	317		3214	2247
																									1059	252	526		2288	642
																									1194	269	331		5416	563
																									1235	429	586		2135	696
																									775	241	314		5418	567
																									1230	286	308		3210	1227
																									1219	166	648		8803	754
																									724	202	844		5600	1656
																									2078	161	587		2514	1367
																									1023	261	649		5744	814
																									1013	237	863		2356	1021
																									818	209	373		2106	3254
																									922	202	418		3364	757
																									685	179	330		2426	617
																									705	205	309		5776	905
																									1115	179	329		2489	755
																									1000	182	536		2337	1375
																									824	277	385		5155	850
																									697	286	300		3184	1054
																									1208	200	449		6888	937
																									824	203	493		2117	629
																									903	504	489		2497	737
																									866	177	379		3327	2392
																									1198	212	426		2949	569
																									702	165	451		3278	822
																									701	224	416		2386	689
																									699	282	455		4308	1299
																									762	300	418		3029	1746
																									1792	222	609		2835	1035
																									853	171	413		2054	631
																									1152	225	638		2784	581
																									656	165	587		2560	704
																									711	572	310		3317	568
																									1079	251	607		2212	1130
																									665	226	664		3459	1441
																									1621	537	536		10300	739
																									1344	813	409		2471	626
																									780	187	349		2541	1533
																									1016	444	766		2362	653
																									661	331	454		4169	599
																									1250	196	351		3065	1577
																									1194	271	673		4398	867
																									1387	178	699		5717	672
																									694	302	752		3529	1145
																									952	193	323		4113	739
																									870	375	650		3410	867
																									938	339	946		7573	1619
																									711	201	430		2015	716
																									910	201	497		4380	973
																									659	200	853		2730	621
																									1188	192	629		5006	976
																									1411	240	546		3776	867
																									983	289	405		3105	1934
																									1541	185	298		5367	2622
																									725	176	453		2078	641
																									1023	193	319		4424	1785
																									1258	174	337		6947	1368
																									1100	180	536		10908	663
																									835	170	700		5470	670
																									1043	904	528		3443	2983
																									1568	300	365		4074	1348
																									1201	182	455		4257	613
																									1092	553	313		2460	842
																									1144	477	1120		2536	1023
																									994	210	357		2064	737
																									754	298	445		2827	3098
																									748	235	611		7940	1242
																									1446	288	411		2512	2213
																									1417	195	625		2184	1798
																									1933	301	306		2406	603
																									804	168	589		6050	803
																									940	255	365		5537	793
																									1148	208	412		4565	929
																									976	387	741		4035	646
																									1283	653	380		2653	908
																									680	301	437		3028	698
																									979	200	377		2247	1227
																									1120	183	776		3438	598
																									844	360	309		4574	1022
																									1416	254	470		5437	566
																									1027	240	312		3405	832
																									825	218	405		4211	587
																									698	1104	958		3749	2691
																									1027	180	622		3442	1338
																									938	239	466		3372	1508
																									781	160	311		2075	1515
																									1189	377	411		2105	1063
																									879	224	323		8791	744
																									692	323	569		9667	749
																									1493	359	631		4411	586
																									760	278	686		4390	718
																									1104	244	321		2442	588
																									1052	231	519		3855	690
																									760	850	576		4265	1258
																									740	182	609		7289	2236
																									778	198	353		3680	2589
																									1008	203	555		4759	581
																									874	188	1939		5786	1327
																									1450	223	952		6386	2434
																									745	356	306		3020	1377
																									1131	406	353		6196	1111
																									768	207	914		2387	670
																									1051	278	673		7723	2507
																									1103	175	722		4375	610
																									883	260	441		5438	1485
																									976	408	371		2858	668
																									889	226	574		3974	1104
																									740	191	402		3358	636
																									1361	179	509		3755	964
																									1045	201	605		3506	2282
																									706	169	470		3776	1527
																									1030	172	300		3400	1607
																									1169	177	484		3417	638
																									1846	645	395		3346	1637
																									1426	221	498		2693	660
																									2237	216	397		2132	670
																									760	221	577		3642	2188
																									957	160	322		2905	708
																									1467	560	815		2991	758
																									1120	283	415		5158	1581
																									993	202	531		2135	619
																									697	315	330		2299	608
																									1486	747	1179		2667	689
																									952	180	531		4285	658
																									868	195	300		4619	707
																									723	184	389		2775	2787
																									673	183	429		7394	648
																									1108	375	454		4033	1411
																									899	397	379		2563	1531
																									1435	162	388		4296	579
																									918	177	374		2944	1268
																									1179	256	342		4606	740
																									967	222	490		2281	625
																									1086	243	341		2025	583
																									1472	313	500		6298	862
																									1055	248	362		5628	589
																									921	296	768		2298	1196
																									1148	312	619		6368	703
																									1404	231	489		2194	1536
																									697	181	382		4602	741
																									700	200	365		5224	853
																									1001	228	426		7031	763
																									1153	163	559		2649	1018
																									764	620	362		3579	575
																									1812	239	490		3520	865
																									1019	269	439		3107	1312
																									769	178	963		5882	593
																									770	217	355		1996	3333
																									1338	209	391		2489	564
																									1302	478	384		2296	1321
																									2213	205	504		2946	1737
																									1214	249	552		8241	830
																									1309	287	411		2254	1365
																									3022	241	347		4067	1240
																									701	226	501		9339	613
																									775	178	798		2898	3147
																									965	281	415		3194	689
																									943	195	352		4417	760
																									842	188	495		2204	827
																									2918	694	618		5239	1860
																									1255	236	479		3805	622
																									1709	167	337		3182	957
																									1150	743	425		2125	726
																									852	260	455		4339	1190
																									1659	227	689		2007	701
																									1051	298	445		2333	602
																									2786	187	487		3100	747
																									794	383	314		4728	2859
																									706	218	827		3402	756
																									759	290	327		6274	1734
																									1084	179	1059		3784	1201
																									743	214	347		2623	1554
																									862	212	709		2104	661
																									1513	207	302		3620	1948
																									1436	291	410		2020	860
																									1330	531	304		3834	563
																									1055	302	654		3003	1045
																									2004	185	439		5103	574
																									741	177	567		4104	1389
																									1145	314	302		2214	1267
																									870	190	385		3441	580
																									813	230	371		2440	642
																									1503	198	438		2121	646
																									1320	184	589		2020	704
																									946	257	513		2909	639
																									936	2261	331		4497	719
																									734	165	381		3040	955
																									1457	160	742		4347	1727
																									851	554	317		2043	1506
																									1008	164	334		3905	841
																									906	510	617		7013	1321
																									861	236	722		2818	910
																									1480	342	603		2037	1390
																									889	226	444		4890	643
																									1415	160	343		3680	1130
																									836	259	598		2599	600
																									1230	283	386		2000	601
																									957	239	680		5889	854
																									1089	176	460		2832	1257
																									656	244	751		6750	771
																									674	252	468		2749	1821
																									979	277	313		4200	594
																									705	760	567		2355	685
																									1100	181	385		3976	682
																									1255	589	360		4744	663
																									982	574	688		3457	650
																									1686	171	386		2276	1033
																									1657	183	426		2250	1097
																									917	188	430		5395	827
																									2900	169	410		2130	766
																									796	167	647		5978	1679
																									1127	214	312		2955	575
																									1004	209	584		3380	2617
																									1122	282	493		2597	1045
																									1270	349	556		2585	610
																									1340	202	1836		2398	665
																									785	258	424		3837	1999
																									2767	160	395		6922	2751
																									706	199	447		2807	830
																									683	937	366		5088	589
																									670	284	498		5188	615
																									952	293	306		2384	700
																									1066	212	307		2962	1130
																									1006	184	360		9528	890
																									806	224	538		3049	1393
																									1226	551	337		2432	1158
																									719	177	324		2088	736
																									2174	295	449		3203	600
																									657	203	477		3936	664
																									910	161	370		6374	3158
																									742	244	300		3526	970
																									2260	216	473		2042	570
																									1405	364	450		1994	1090
																									1491	195	329		5842	1122
																									864	346	911		4671	708
																									782	441	474		7458	1275
																									894	269	520		7195	590
																									1687	358	549		4445	982
																									841	235	380		2043	1399
																									1208	492	543		5817	2650
																									794	377	740		2665	1450
																									769	233	305		2603	1458
																									798	352	420		3563	753
																									898	212	616		7026	618
																									1161	161	464		2075	928
																									1156	218	395		4010	1019
																									728	195	492		2393	904
																									1295	207	523		2926	884
																									2044	302	510		3367	729
																									1435	448	450		5213	1729
																									919	551	309		2610	1588
																									1797	268	353		4828	644
																									1483	250	316		2900	5934
																									1166	185	538		2053	721
																									688	367	324		3555	862
																									1205	160	379		2573	1039
																									716	198	344		2030	1194
																									1012	213	303		3497	729
																									1308	336	329		2935	1851
																									853	227	404		4479	1471
																									811	482	514		2686	881
																									1100	210	385		3738	1209
																									775	166	299		5997	683
																									2223	217	388		2226	1836
																									875	301	572		2885	2267
																									693	208	311		4894	760
																									672	240	647		2415	1017
																									1376	323	415		5665	1259
																									1470	166	392		10111	1644
																									1002	259	314		3991	1820
																									753	268	308		4230	1393
																									1288	385	465		2163	867
																									717	191	2904		3078	1268
																									1347	215	507		2775	822
																									690	648	455		2916	1606
																									762	378	302		5105	817
																									686	174	393		2918	567
																									792	589	324		11416	1464
																									721	1175	737		2642	843
																									829	183	502		4772	1583
																									712	340	1093		2578	2997
																									812	321	350		1993	571
																									1445	260	403		3491	1290
																									887	296	384		8296	572
																									881	236	344		2989	2698
																									1373	187	424		9915	1057
																									669	414	353		4084	1710
																									1384	174	526		2535	1260
																									1040	274	416		2309	1435
																									904	330	349		2704	1245
																									884	308	388		7083	776
																									694	178	319		3548	686
																									1154	558	595		2350	614
																									777	456	559		3654	1685
																									809	192	601		2562	1563
																									661	282	304		8076	967
																									1093	229	548		4770	669
																									688	410	778		2426	1332
																									1327	176	522		6720	1226
																									1775	197	455		3884	895
																									738	162	313		4015	933
																									948	229	673		3201	741
																									1457	671	390		2027	855
																									690	161	401		4388	1035
																									2120	229	525		4473	2050
																									1245	326	313		2274	1291
																									1224	314	313		2851	564
																									840	205	382		2829	1116
																									768	237	412		2572	721
																									952	205	852		3850	2186
																									1439	217	343		5358	583
																									761	542	901		2146	1008
																									1405	209	725		2921	859
																									776	284	588		2234	787
																									2474	561	916		2268	590
																									1737	209	397		5971	707
																									865	250	520		2935	1266
																									824	196	594		6903	599
																									1087	427	798		3241	572
																									671	223	451		2164	1772
																									942	164	746		2217	1348
																									2472	266	388		2935	617
																									952	224	868		2373	586
																									1304	313	726		2058	1146
																									776	216	380		8303	614
																									659	235	524		6012	1970
																									1229	375	614		5240	1565
																									1391	162	349		3605	596
																									733	618	427		2901	575
																									836	165	382		2529	715
																									678	422	483		6631	612
																									1455	162	405		6657	1076
																									2231	340	432		2681	733
																									1414	283	448		6962	717
																									724	479	410		4382	1073
																									657	178	357		2197	717
																									1209	210	527		7748	566
																									1501	414	357		2628	2380
																									2041	492	1098		3646	1651
																									1536	442	443		2607	639
																									1390	230	636		2006	5667
																									2161	167	531		5719	2484
																									1672	164	464		2783	1454
																									1393	221	501		3192	674
																									1715	195	384		2897	1158
																									1012	241	373			713
																									1036	168	379			811
																									698	162	784			1256
																									866	172	594			798
																									670	260	701			1975
																									766	181	1037			1510
																									1101	477	297			774
																									1740	184	407			774
																									1122	167	297			1097
																									741	187	495			622
																									900	268	857			896
																									1393	162	331			944
																									800	241	370			682
																									987	384	337			746
																									1093	399	414			563
																									1173	776	307			1287
																									758	218	297			577
																									731	246	384			671
																									863	205	788			1502
																									1394	204	549			1894
																									656	281	331			1460
																									712	173	450			769
																									1592	282	314			578
																									1588	184	559			883
																									956	501	503			965
																									663	166	809			780
																									1037	204	429			3113
																									1511	178	343			568
																									1209	195	342			771
																									793	214	364			928
																									1028	162	352			575
																									924	656	371			1345
																									805	656	746			1518
																									750	165	530			570
																									883	208	423			1203
																									668	651	757			884
																									1340	227	328			589
																									2097	451	441			751
																									1869	237	484			1660
																									823	257	404			1644
																									781	177	320			1744
																									678	220	428			1097
																									700	296	348			1971
																									766	181	538			1513
																									1006	183	467			997
																									1678	180	433			1375
																									1276	183	681			601
																									832	288	381			1760
																									794	235	736			635
																									1104	444	1155			821
																									1049	390	385			1554
																									921	194	302			893
																									930	300	471			659
																									1138	189	579			883
																									1002	287	327			653
																									787	1661	665			695
																									950	378	440			589
																									868	510	306			1262
																									1074	299	630			1359
																									1283	413	514			698
																									1078	232	458			1798
																									707	458	717			2399
																									1733	486	320			2582
																									847	322	1041			1811
																									813	183	352			613
																									769	347	494			1356
																									920	320	820			671
																									1408	210	404			1120
																									673	215	535			613
																									1701	253	486			2747
																									1070	217	410			669
																									934	283	391			1852
																									1321	287	445			2104
																									905	178	373			622
																									1215	219	516			634
																									666	268	393			914
																									836	390	418			605
																									802	211	794			923
																									910	161	336			3008
																									702	190	680			1088
																									674	293	496			1319
																									1014	171	416			853
																									931	180	843			1616
																									799	434	512			961
																									983	379	732			829
																									711	190	301			1691
																									1117	238	314			933
																									2086	568	481			569
																									810	237	300			664
																									813	184	534			816
																									765	160	459			716
																									2303	490	565			916
																									1534	167	403			687
																									681	239	349			983
																									1073	290	916			622
																									960	200	521			601
[truncated: 17,975 more rows]
