# Supplementary material for: Wag31, a membrane tether, is crucial for lipid homeostasis in mycobacteria
Source: eLife journal article supplement (doi:10.7554/elife.104268), 2025-01-17
Supplement: fig5-data1 [file elife-104268-fig5-data1-v1.zip]

Figure 5a-Source Data

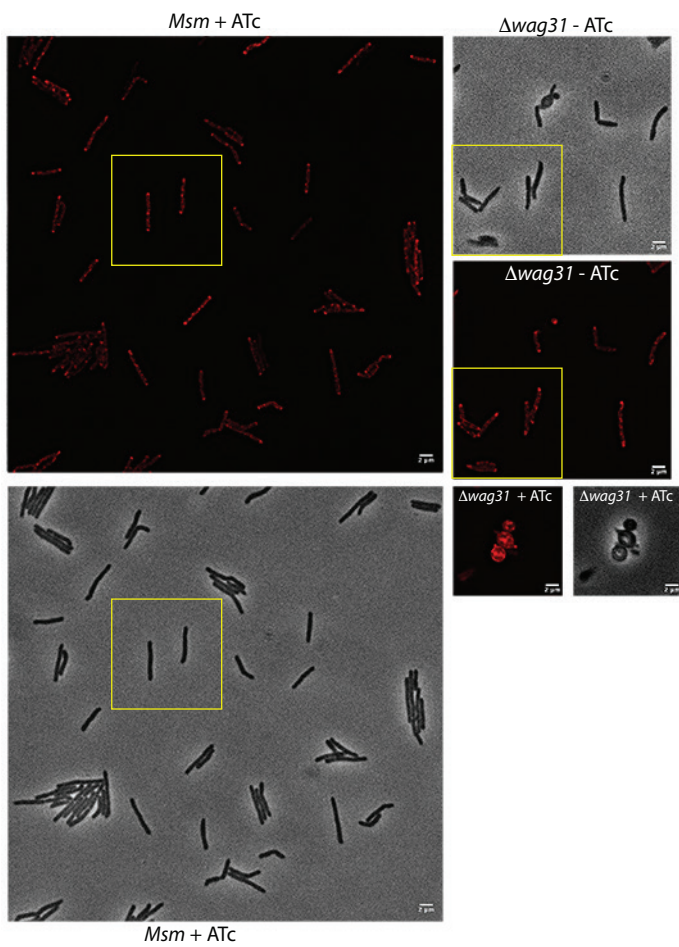

Boxed areas were used for the figure

Figure 5b-Source Data

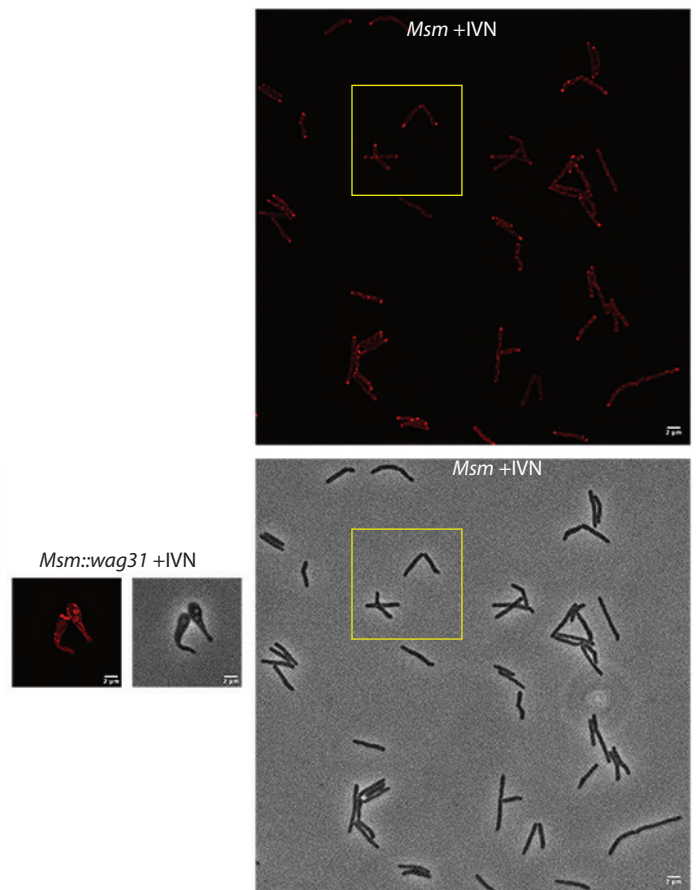

Boxed areas were used for the figure
