# Supplementary material for: Wag31, a membrane tether, is crucial for lipid homeostasis in mycobacteria
Source: eLife journal article supplement (doi:10.7554/elife.104268), 2025-01-17
Supplement: fig5-data3 [file elife-104268-fig5-data3-v1.zip]

## Sheet: Sheet1
Figure 5b-Source Data					Figure 5d-Source Data
Cell length	Msm	Wag31KD	Wag31KD+ATc		Cell length	VC +IVN	Wag31 OE
0	70.4496	67.0558	45.6748		0	90.0327	17.9865
1	71.2145	68.3503	45.9657		1	89.718	18.9336
2	82.2867	80.3108	48.7553		2	89.4563	24.232
3	86.2233	86.0798	53.6319		3	85.1141	29.8663
4	85.8979	88.4858	56.9937		4	79.3536	35.1735
5	82.5079	88.4933	58.3445		5	72.7231	40.0061
6	77.2164	84.983	58.5228		6	65.1167	43.269
7	69.8709	80.5577	58.0819		7	57.6398	45.1668
8	62.8656	76.0878	57.3091		8	50.4156	45.4386
9	55.8389	71.1753	56.2311		9	44.278	46.0381
10	50.2833	66.2317	54.2418		10	39.1865	44.5295
11	45.2543	62.4323	52.393		11	34.9602	42.8112
12	41.412	59.3102	50.8689		12	32.9317	40.5724
13	38.497	55.6902	48.1065		13	30.9249	38.1684
14	36.4802	51.8907	47.1868		14	29.9662	35.8469
15	33.9218	48.3932	46.0728		15	29.461	34.853
16	32.995	46.2656	44.442		16	29.4328	33.2879
17	32.1867	44.0723	43.6392		17	29.7809	32.3592
18	32.4756	41.5186	42.6951		18	30.1623	31.7548
19	32.3782	40.3569	42.452		19	30.4679	31.1686
20	32.7836	39.056	42.4141		20	30.7312	30.8097
21	32.3126	38.9113	41.9677		21	30.4259	30.4862
22	32.4467	37.127	41.8189		22	30.4838	30.2351
23	33.1502	37.3269	42.1412		23	30.3093	30.4666
24	33.3963	36.8439	42.3191		24	29.6782	30.634
25	33.9491	35.1223	43.2677		25	29.6517	29.9724
26	34.2766	35.2961	43.715		26	29.8314	29.0238
27	34.1978	34.9459	43.7274		27	30.2417	28.1192
28	34.8632	35.3023	44.6068		28	30.6817	26.7017
29	35.8759	36.2101	45.6036		29	31.277	26.2751
30	35.9572	36.7136	45.9391		30	31.7447	26.3515
31	35.8643	37.5142	46.7424		31	32.2748	26.2005
32	35.4299	38.5483	47.773		32	32.6711	26.9394
33	35.3186	38.837	49.3341		33	32.4218	27.5404
34	35.2174	38.6905	49.6878		34	32.2569	27.6482
35	35.3692	38.4314	50.8518		35	31.8977	27.6772
36	35.8896	38.4971	51.6392		36	30.8103	27.9515
37	36.6344	38.2426	51.8122		37	30.514	27.5858
38	36.9674	37.5846	53.0318		38	30.4087	26.823
39	37.3014	37.152	53.6823		39	30.8471	27.1241
40	37.2083	37.3587	54.1843		40	31.9733	28.085
41	36.7652	37.3305	54.3698		41	32.9799	28.7829
42	36.652	38.1643	54.4314		42	33.4512	30.3217
43	37.1856	38.5576	54.8788		43	33.5782	31.5714
44	37.7484	39.7583	55.0521		44	33.2494	32.4426
45	37.5289	40.5521	54.8625		45	32.6412	32.5558
46	37.4573	40.8247	54.8849		46	32.5958	31.7905
47	36.9521	40.5442	55.5358		47	32.5677	30.6204
48	36.1038	40.4176	54.7046		48	32.1041	29.5314
49	35.4068	39.7285	53.9776		49	31.5708	28.7355
50	35.6506	39.3926	53.076		50	31.3274	27.4365
51	35.684	39.2182	53.0105		51	31.3068	27.3745
52	36.815	39.7719	52.7283		52	32.2604	27.423
53	37.3669	40.3444	51.9027		53	32.7578	27.747
54	38.1848	41.1703	51.2237		54	32.9932	28.8029
55	39.038	41.0289	50.3927		55	33.6657	30.0549
56	39.7891	41.2508	50.0852		56	34.9329	30.8856
57	39.8274	41.6902	49.4534		57	35.8685	31.2503
58	40.3574	41.2227	49.0622		58	36.8668	31.1558
59	39.0189	40.7952	48.7372		59	36.203	31.2908
60	37.7701	40.1178	47.8618		60	34.9049	31.3953
61	36.5316	39.278	47.4781		61	33.5235	32.1611
62	35.4018	38.7161	47.3047		62	31.5619	31.9215
63	34.7944	38.5946	46.475		63	30.9118	31.2934
64	33.8646	38.1116	46.8416		64	30.4176	31.7435
65	33.6882	38.388	47.3253		65	30.2858	31.3341
66	33.9407	38.5449	46.3502		66	30.3756	30.8937
67	34.1932	38.5149	46.4027		67	30.5319	29.8723
68	34.4018	38.9493	45.4951		68	30.5997	29.8701
69	34.1709	39.3189	45.0432		69	30.4139	29.5657
70	33.5515	39.538	45.0354		70	29.8789	29.5355
71	33.7313	39.6161	44.2554		71	29.7357	30.2221
72	33.2998	38.606	44.5108		72	29.7975	31.2309
73	33.9733	38.5988	43.9063		73	29.4572	32.9424
74	34.1801	38.5302	43.8469		74	29.2227	33.1113
75	34.7793	38.4773	43.2616		75	29.76	33.4044
76	34.7509	38.3399	43.0973		76	30.6671	33.4044
77	34.7157	37.7514	43.0017		77	31.54	33.0601
78	35.2951	37.3726	42.9396		78	32.0625	32.9201
79	35.3314	37.01	43.8479		79	31.469	32.8454
80	35.4991	35.8932	43.9567		80	31.117	33.1594
81	35.0925	34.7898	45.1529		81	30.7904	32.8223
82	35.3576	34.1046	45.4405		82	30.3145	33.9902
83	35.4588	33.3927	46.2943		83	30.9047	34.2492
84	35.1227	33.5515	47.5722		84	31.0188	34.4186
85	34.6263	34.1134	48.6208		85	31.3365	34.7983
86	34.8045	34.6966	49.5232		86	31.6796	35.8066
87	34.1614	35.3176	50.4144		87	31.3164	36.8528
88	33.8392	35.9642	51.6095		88	30.6871	37.4238
89	33.4606	36.6006	52.641		89	30.798	37.5293
90	33.3509	38.304	54.5436		90	31.6982	37.5437
91	34.7572	41.1741	55.3622		91	33.1103	36.9783
92	36.7132	43.8452	55.6961		92	35.897	36.3114
93	39.8846	48.6234	57.2162		93	38.2097	35.8163
94	43.7018	53.493	59.6126		94	41.4738	34.3463
95	49.4915	59.0386	59.2798		95	45.4782	33.7605
96	55.2632	66.1868	58.8579		96	49.9447	33.5224
97	59.183	72.0297	59.9705		97	55.3819	31.006
98	63.3018	76.2884	57.0277		98	59.3104	27.7864
99	63.9881	76.7498	56.105		99	62.1191	23.7366
100	58.4738	69.7105	47.0295		100	61.1059	19.5666
Figure 5f-Source Data
	Msm+ATc			Wag31 KO			Wag31KO +ATc			Wag31KO::FL			Wag31KO::FL+ATc			Wag31KO::K20A			Wag31KO::K20A+ATc			Wag31KO::Delta			Wag31KO::Delta+ATc
0	5000000	3000000	9000000	4000000	4000000	6000000	8000000	5000000	3000000	5000000	3000000	7000000	5000000	7000000	7000000	6000000	5000000	4000000	4000000	4000000	6000000	3000000	4000000	3000000	2000000	2000000	4000000
12	400000000	300000000	400000000	300000000	400000000	300000000	6000000	7000000	7000000	300000000	500000000	200000000	200000000	300000000	100000000	300000000	400000000	100000000	200000000	100000000	200000000	300000000	100000000	400000000	5000000	4000000	5000000
Figure 5g-Source Data
Msm
Rods	all						rods	bulged	round
1						Msm	1	0	0
Wag31KD-Atc						Wag31KD-Atc	0.65	0.335	0.01
Rods	Bulged	Round	total			Wag31KD+Atc	0.328	0.3	0.37
123	64	2	189			Wag31KD+Atc:: FL Wag31	0.66	0.32	0.02
						Wag31KD+Atc:: Wag31K20A	0.76	0.225	0.01
						Wag31KD+Atc:: Wag31DEltaN	0.21	0.54	0.25
Wag31KD+Atc
Rods	Bulged	Round	total
62	57	70	189
Wag31KD+Atc:: FL Wag31
Rods	Bulged	Round	total
125	60	4	189
Wag31KD+Atc:: Wag31K20A
Rods	Bulged	Round	total
144	43	2	189
Wag31KD+Atc:: Wag31DEltaN
Rods	Bulged	Round	total
40	102	47	189
