# Supplementary material for: Wag31, a membrane tether, is crucial for lipid homeostasis in mycobacteria
Source: eLife journal article supplement (doi:10.7554/elife.104268), 2025-01-17

Figure 6a-Source Data- Area shown by yellow box is used for making the figure

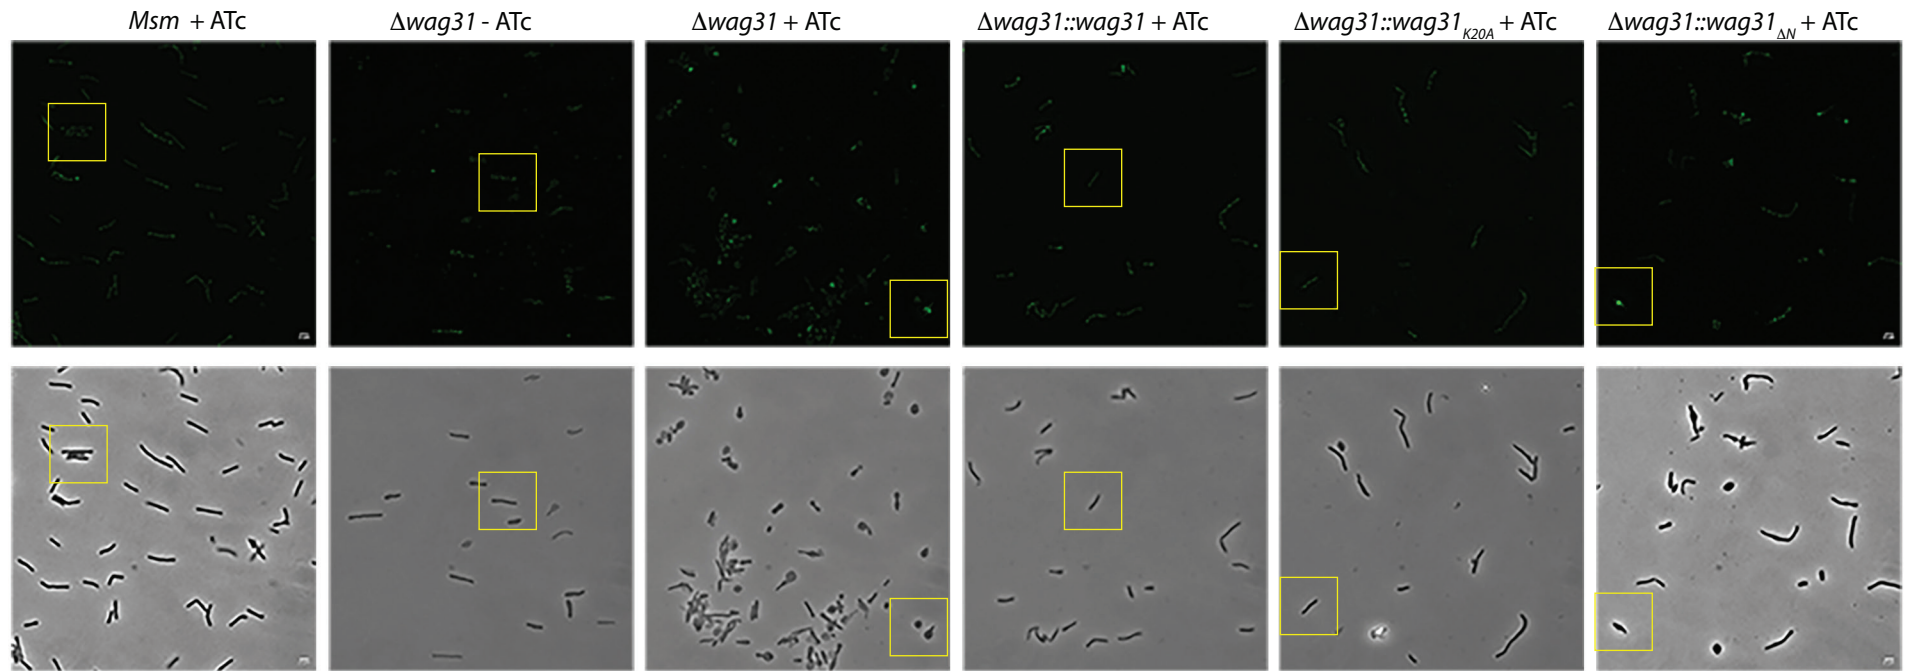

Figure 6c-Source Data- Area shown by yellow box is used for making the figure

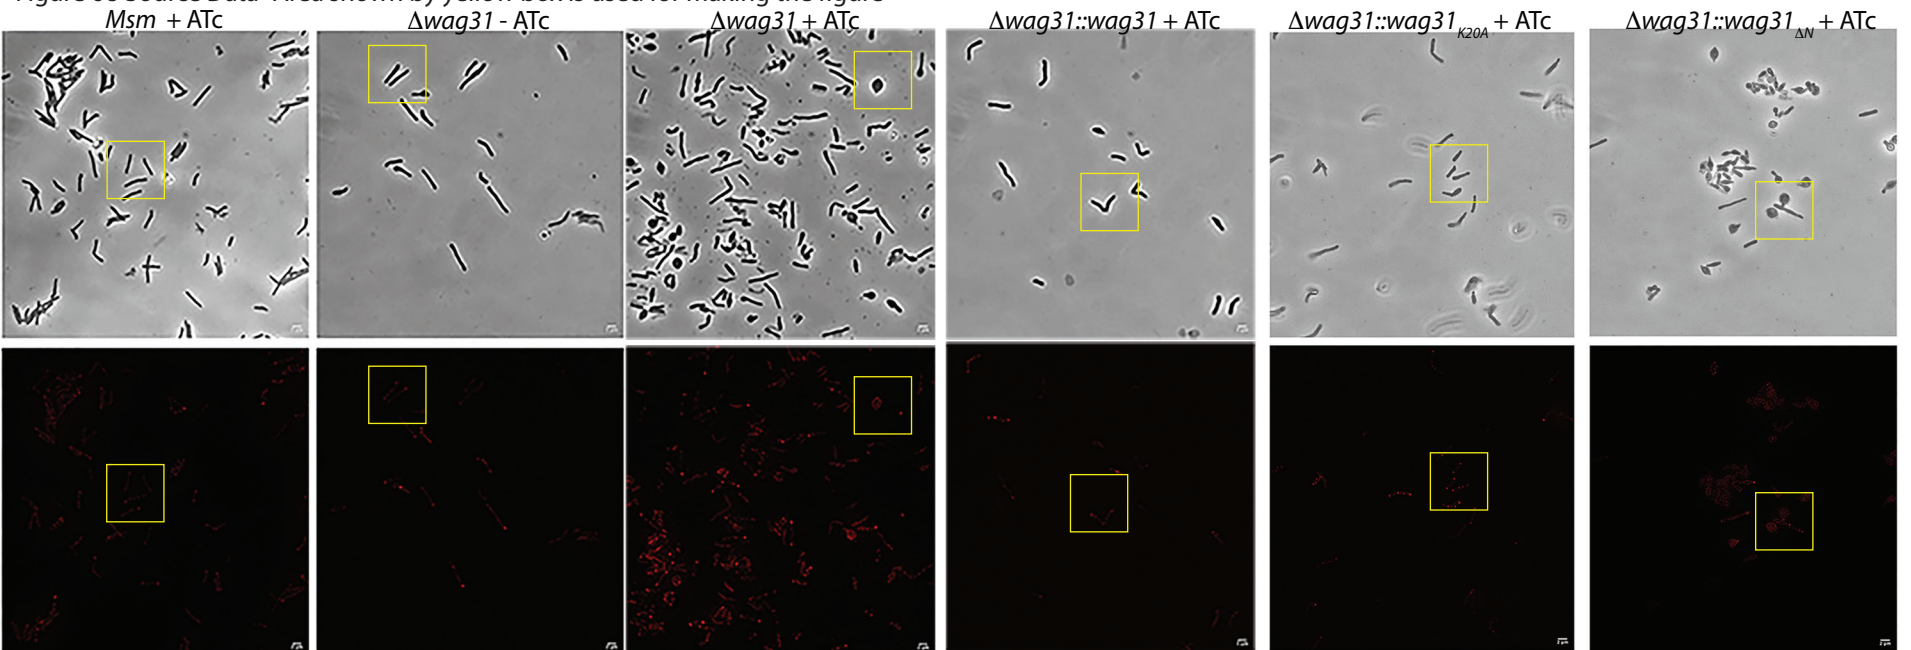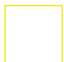

Supplement: fig6-data1 [file elife-104268-fig6-data1-v1.zip]
