# Supplementary material for: Wag31, a membrane tether, is crucial for lipid homeostasis in mycobacteria
Source: eLife journal article supplement (doi:10.7554/elife.104268), 2025-01-17
Supplement: fig6-data3 [file elife-104268-fig6-data3-v1.zip]

## Sheet: Sheet1
Figure 6b-Source Data							Figure 6d-Source Data
Msm+ATc	Wag31-ATc	Wag31+ATc	FL +ATc	K20A +ATc	DeltaN +ATc			msm+atc	wag31 KO - atc	wag31 KO +atc	FL+atc	k20A+atc	deltaN+atc
2753.69	2165.18	3489.58	4031.36	11192.9	25861.8		0	27.8381	31.7917	50.0733	35.7317	40.0353	39.1298
1282.72	2060.42	7934.42	4964.02	5245.2	7471.87		1	27.8381	34.8442	50.3008	35.7317	40.6353	39.3285
1653.01	1970.94	5272.31	10217.9	6829.48	8136.96		2	38.2716	42.4343	50.4049	36.091	41.7417	41.2659
1146.09	3066.02	4011	11529.9	5836.34	6484.16		3	45.8382	48.082	51.6185	39.1037	42.4194	41.7373
1452.75	1828.92	5917.58	5757.9	6616.86	8492.69		4	50.091	50.0813	53.0933	37.2417	42.5689	44.2007
1244.01	4491.37	6949.69	4222.73	6010.08	40950.2		5	53.7398	50.4997	51.8526	39.9816	42.1351	46.2532
811.276	3839.42	3381.79	8434.01	5462.27	41831.7		6	54.4819	46.7759	52.7172	39.4165	42.0352	47.7585
1306.62	3926.59	13436.1	13810.6	3728.88	38107.2		7	52.8777	41.9179	50.9797	40.3427	42.2621	48.7634
1256.01	1991.2	4979.95	6583.67	7858.58	32802.7		8	49.7084	37.6104	51.1547	38.9875	40.6076	47.6568
990.188	4451.57	5663.01	6037.57	4555.9	10392.7		9	46.0002	32.9845	50.4975	39.8177	38.3946	48.3652
1086.7	4677.74	3953.68	4238.52	3070.09	38412.6		10	42.2862	29.8327	50.0088	39.0253	34.3393	48.5738
1484.05	2937.09	9285.93	4990.89	2584.96	19356.9		11	38.2383	25.0741	48.6538	39.9893	32.349	46.9582
1558.64	5113.31	4950.45	5047.3	5930.84	44867.4		12	33.0236	22.5375	48.5406	37.2272	28.0237	46.3511
1537.81	3778.37	8319.86	6365.33	6118.26	36525.1		13	30.259	21.5137	47.0445	33.9383	27.0884	43.6573
956.949	2371.32	9228.97	5016.45	6803.6	15140.9		14	26.6666	21.8783	45.6448	31.4398	25.5753	42.4178
1711.32	3071.28	3905.9	4306.83	4222.65	11450		15	25.4547	21.2407	45.9382	28.5193	25.1364	40.7644
1498.26	3511.4	4477.24	14423	1977.49	44264.4		16	24.0282	21.7218	46.7302	26.6712	25.7902	40.4387
1314.28	4702.88	13272	11297.7	5160.43	21819.4		17	23.1911	19.8985	46.6577	24.8106	25.9522	39.7076
1998	4417.75	8290.26	3910.97	5677.41	16928.9		18	23.0559	17.6687	46.5935	22.8847	27.385	39.6874
2011.19	3829.57	7328.12	3708.48	9543.71	18282		19	22.6488	15.7253	47.9747	21.9064	27.9809	37.5386
2767.03	2164.62	6410.67	52100.9	7885.1	36507.1		20	21.3623	13.475	47.2605	20.6297	29.0165	35.2323
46021.4	3179.08	60420.7	46786.3	4626.99	46408.7		21	21.5707	14.0115	46.865	20.918	29.7152	35.2084
59128.5	4886.86	125770	47236.9	5121.98	39497.7		22	20.6849	13.619	47.4101	20.5521	27.8898	34.4909
56439.9	5597.04	43882.2	49264.6	5444.38	40183.4		23	20.9715	17.0062	47.0575	20.1017	27.1689	34.1061
97388.5	5021.4	86361.2	35375.7	5775.34	39261.4		24	20.4705	18.8454	47.4464	19.7387	26.5079	33.5439
110650	2999.87	64956.1	38328.5	6770.48	45500.9		25	20.6819	20.1369	47.7381	17.4739	26.1042	31.8502
85125.7	4623.4	18739.1	38133.3	4157.35	37247.8		26	20.151	19.0381	48.2988	17.4115	25.8567	31.217
42796.9	5357.87	64712.5	6301.01	4554.96	29164		27	19.8843	18.3655	49.4224	15.8508	24.5641	31.0206
42561.4	4480.9	38573.7	4654.1	2588.21	37804		28	18.3512	16.7755	49.4734	14.9306	24.4268	31.9425
51122.4	4084.14	40555.4	7611.75	2647.34	44313.3		29	18.1644	16.9428	50.7218	13.3278	23.3045	33.9829
37822.5	6758.78	34249.6	3173.08	2604.75	45398.2		30	16.5484	17.5885	50.9051	12.8326	22.8814	35.8339
27977.4	3704.97	125666	8699.79	4074.8	33427.4		31	16.4918	18.0368	50.2679	12.9141	22.1078	35.8421
3371.91	6169.76	30160.9	3672.55	8080.3	28775.4		32	15.1226	16.8755	49.2119	12.5428	22.7008	35.8884
3033	3787.32	73174.8	8689.07	9199.63	26705.5		33	14.9079	18.5054	48.7824	13.3857	22.5216	36.3235
2707.55	8677.71	5513.56	4123.84	8580.21	33449		34	16.5692	19.0833	47.9354	14.0234	23.6854	34.9814
2853.05	6279.28	9886.17	2480.64	4950.99	39286.1		35	17.2075	20.3434	47.465	14.6401	23.721	34.8592
5335.15	7403.84	6492.22	3873.7	6268.93	8531.75		36	19.1899	21.2527	46.0966	15.8635	24.094	34.405
2311.81	9032.54	3382.93	6953.44	5085.87	30989.5		37	20.571	20.817	45.4447	17.1158	24.5104	35.6176
3990.38	7724.13	5568.67	45252.1	5714.14	35301.6		38	22.026	21.1262	44.0327	17.5161	24.2024	37.7067
4128.41	5408.8	6829.02	27413.2	4051.74	18472.4		39	22.8275	20.1657	45.104	18.6234	22.8812	38.9457
2401.33	5161.17	6459.42	4245.49	7158.38	43914.9		40	22.2421	18.5122	43.1009	19.1532	22.9655	39.5618
3741.18	8761.92	6498.79	5095.19	7637.68	14800.5		41	23.0148	17.4815	42.7443	18.6967	22.0699	39.4271
4076.34	3926.05	10715.5	2686.69	4793.25	25747.6		42	21.9798	17.0205	42.7329	17.6435	21.6424	39.3191
3293.54	4979.5	5919.33	3122.31	8277.9	15162.4		43	21.8025	17.7588	41.2887	17.3252	21.31	38.1843
1933.27	4491.44	5218.93	2575.03	3938.17	9813.24		44	20.6403	18.25	41.2574	16.7049	20.8925	38.3257
1672.44	3142.15	11476.2	4542.62	7232.37	16678.6		45	19.8244	17.7448	40.1568	16.6953	21.3757	37.2705
2371.97	9406.86	10961.3	6151.93	7020.92	11004		46	19.5289	19.2436	39.9682	16.1808	22.9751	37.3667
2194.68	5370.91	6567.07	4272.38	6497.91	18316.7		47	18.5936	19.7108	39.8853	16.1512	23.3387	37.2101
2520.66	3374.15	5562.18	54297.5	8095.21	22882		48	18.6291	19.8682	39.6868	17.1304	23.4446	36.4918
2008.49	6986.18	7187.34	38520.5	5870.18	16898.6		49	18.3679	19.8953	40.7738	17.9704	22.5028	35.8668
3490.35	3799.61	74095.8	50060.9	9393.14	38481.4		50	17.6693	17.9656	41.249	20.0841	21.661	35.5184
2117.26	6368.44	57580.2	24837.3	4276.07	25919.9		51	17.8543	18.6202	41.1019	20.3213	22.0802	35.6644
1746.96	3369.25	81321.4	38029.9	4631.32	25861.8		52	17.4773	17.7433	42.1084	20.6893	21.2305	36.282
3225.96	2103.47	26472.9	3832.65	4030.42	7471.87		53	16.1051	17.4445	42.1395	20.8934	22.0681	37.8422
3403.94	2449.45	102836	5313.59	6415.48	8136.96		54	17.0692	16.1711	42.6797	20.9806	22.082	37.6591
2314.39	2007.19	25440.5	40666	4761.73	6484.16		55	16.8977	15.8716	43.6686	19.6038	22.73	39.4865
3393.48	1706.63	34071.1	5839.61	5003.95	8492.69		56	17.4321	14.6927	44.9826	19.8079	22.9773	41.0615
1826.16	4178.03	29249.8	7605.15	9363.12	40950.2		57	17.7554	12.1498	45.7662	18.6468	23.6999	40.4239
2845.97	1708.88	24069.2	3409.63	34969.3	41831.7		58	18.9178	12.1414	47.5327	17.5309	23.2542	41.6871
3741.25	3277.58	58829.9	5937.4	39709.3	38107.2		59	19.6497	10.8074	48.0582	15.8805	24.1091	40.486
3582.45	2155.14	31870.1	5344.85	32125.7	32802.7		60	21.3519	10.928	48.2338	14.9934	24.1508	39.6679
3854.57	2506.76	49482.4	6225.58	25087.7	10392.7		61	21.8958	11.2975	48.6728	14.6157	24.2167	38.5696
2145.76	2364.09	50740.8	2797.76	33835.6	38412.6		62	22.405	12.4983	47.8448	14.1213	24.9106	37.821
3964.44	2170.41	68898.6	4060.49	35808.2	19356.9		63	21.6253	13.5505	47.9604	13.7513	24.5697	36.0685
2095.19	2827.53	28490.9	3326.43	19820.2	44867.4		64	21.7571	14.1164	47.562	13.8464	23.7764	36.6561
1930.64	2275.05	71810.8	3254.37	24120.9	36525.1		65	21.1546	13.4618	47.6816	14.3308	22.6402	36.7046
3408.5	3574.03	132166	2638.7	29724.1	15140.9		66	21.6106	13.7107	47.8635	14.6772	22.0415	36.3191
1974.79	2131.64	62540.8	3703.27	29959.3	11450		67	20.6016	13.1673	47.318	15.1727	21.2996	35.1946
1568.47	1877.5	64259.8	4865.56	39690.4	44264.4		68	20.7099	13.4153	47.4245	14.8771	21.3383	34.6455
893.811	3025.21	78234.8	2248.73	33161.5	21819.4		69	19.3553	12.2321	48.2687	15.2851	21.7354	34.3174
765.789	3722.17	64862.6	5462.72	34921.3	16928.9		70	18.5459	15.071	47.6203	15.7422	22.4165	34.4955
812.89	6205.99	96904.8	3814.16	35562	18282		71	17.8285	15.9141	48.0331	15.9553	23.137	34.9168
1030.53	2122.07	41659.8	2698.49	31031	36507.1		72	18.2566	16.9076	48.2192	16.7953	23.2681	34.448
1228.37	2446.73	56359.6	5199.81	33803.3	46408.7		73	16.8182	17.0546	47.3719	17.9086	23.0098	35.0088
1320.1	4471.98	66221.6	2125.59	41602.6	39497.7		74	17.1893	15.6119	47.6256	17.2907	22.2453	35.7351
899.727	3576.65	59390.1	3685.28	9154.93	40183.4		75	17.1823	15.6389	46.3578	17.8275	22.1771	36.0838
1427.22	2760.18	82153.7	4956.13	2655.71	39261.4		76	17.9508	14.692	45.3948	17.1967	21.56	35.8645
1608.74	3131.64	65618.6	3961.1	3851.52	45500.9		77	18.327	14.0336	43.6723	17.1849	21.1404	34.4963
1882.19	2560.35	47236.7	3341.37	3985.54	37247.8		78	19.9196	15.01	44.8774	17.1722	21.1214	32.8584
2433.49	1663.12	39610.2	2964.93	4748.56	29164		79	20.9805	15.5268	45.4567	18.2073	21.1908	31.5702
1365.98	3089.47	44112.6	3634.25	10131.5	37804		80	22.1809	18.2407	45.5455	18.7609	21.4843	31.1571
1145.73	1992.54	56631.8	3562.02	15151.8	44313.3		81	22.9511	20.4243	46.5107	19.5396	21.8405	29.6516
2447.09	2469.52	38529.7	3009.3	8825.97	45398.2		82	22.3029	23.1062	48.6705	20.6469	22.2055	30.4419
1049.34	2830.64	67647.9	4429.83	3585.39	33427.4		83	22.4831	25.1968	48.1776	22.0578	22.5436	30.08
2577.12	2359.76	139690	2752.95	4965.16	28775.4		84	20.1637	26.3857	48.4009	23.065	23.9115	30.9
1876.04	1776.32	43249.1	2807.05	8888.46	26705.5		85	20.3222	27.338	50.2571	24.592	25.5497	30.6561
1803.92	2046.63	28906.4	7804.2	6554.9	33449		86	20.4173	24.0866	49.6805	24.6488	26.5009	30.9875
1313.87	3827.44	23720.1	4491.32	7325.11	39286.1		87	19.9281	25.3063	49.8003	25.2746	26.5831	31.8138
1045.72	2601.33	43938.5	15717.7	4797.13	8531.75		88	21.7787	22.665	50.2169	26.4795	27.027	32.8563
1410.16	3622.79	29643.3	9767.25	7477.7	30989.5		89	21.9253	23.7873	49.073	27.2558	27.675	33.8161
1903.96	2747.08	30208	4408.31	5609.14	35301.6		90	23.9597	22.3561	50.1356	28.6628	28.0703	34.0805
1963.82	2127.19	67582.7	4748.35	18270.2	18472.4		91	24.6682	23.7453	49.9654	29.3343	28.2019	34.9871
2092.93	2856.43	38053.9	4709.5	41497.8	43914.9		92	25.7054	21.2685	49.7206	31.36	28.7955	35.3281
1489.88	3644.21	74804.2	1909.84	27752.3	14800.5		93	26.996	22.65	50.3066	31.4015	30.1166	36.7305
1683.4	4566.68	26275.7	1952.3	33527.9	25747.6		94	28.4105	22.4373	50.4782	31.8651	31.4648	37.4288
840.471	3890.44	61014	1995.39	46122.5	15162.4		95	27.9429	22.271	49.7077	33.4651	31.7209	37.1822
1467.95	2385.73	45146.8	2599.53	47430.7	13430.4		96	27.3896	22.1515	49.0974	35.0254	32.5867	35.5309
936.137	3549.76	33293.9	4400.3	15156.6	14834.5		97	26.3684	23.1025	49.0827	32.6153	31.807	34.61
1281.34	1848.18	36879.9	13999.4	11959.7	17174.3		98	25.0079	22.737	47.1707	31.9675	30.8167	33.1932
1155.93	1907.61	242804	30077.2	6022.43	31047.3		99	22.7293	19.9693	47.0068	28.8819	28.7297	31.968
							100	19.7643	15.8071	49.7207	21.8208	25.5828	30.1903
