# Supplementary figures and images for: Wag31, a membrane tether, is crucial for lipid homeostasis in mycobacteria
Source: eLife journal article supplement (doi:10.7554/elife.104268), 2025-01-17

Source Data: Fig 1- Fig Supplement 1b: Control and other  
PCRs shown in the figure are marked.

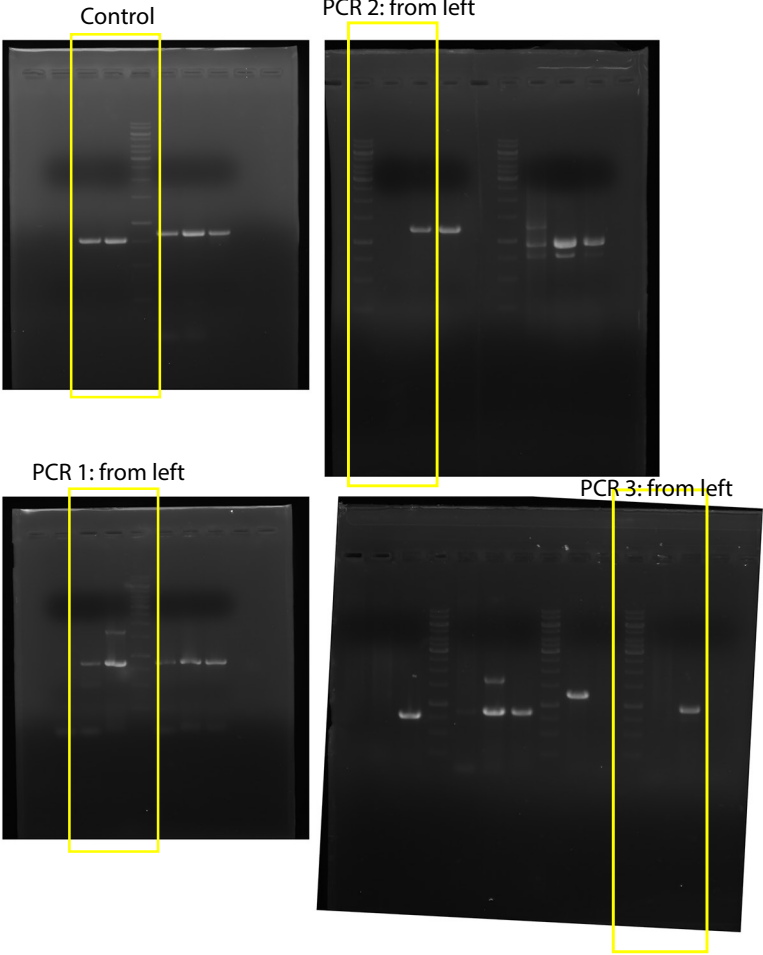

Supplement: fig1-figsupp1-data1 [file elife-104268-fig1-figsupp1-data1-v1.zip]

Figure 2-Figure Supplement 1-Source Data 1

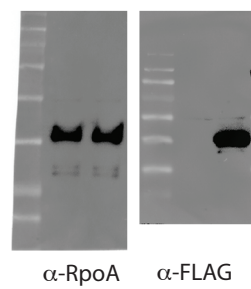

Supplement: fig2-figsupp1-data1 [file elife-104268-fig2-figsupp1-data1-v1.zip]

Figure 3- Source Data 2- Source data used for generating 3b, 3c and 3d

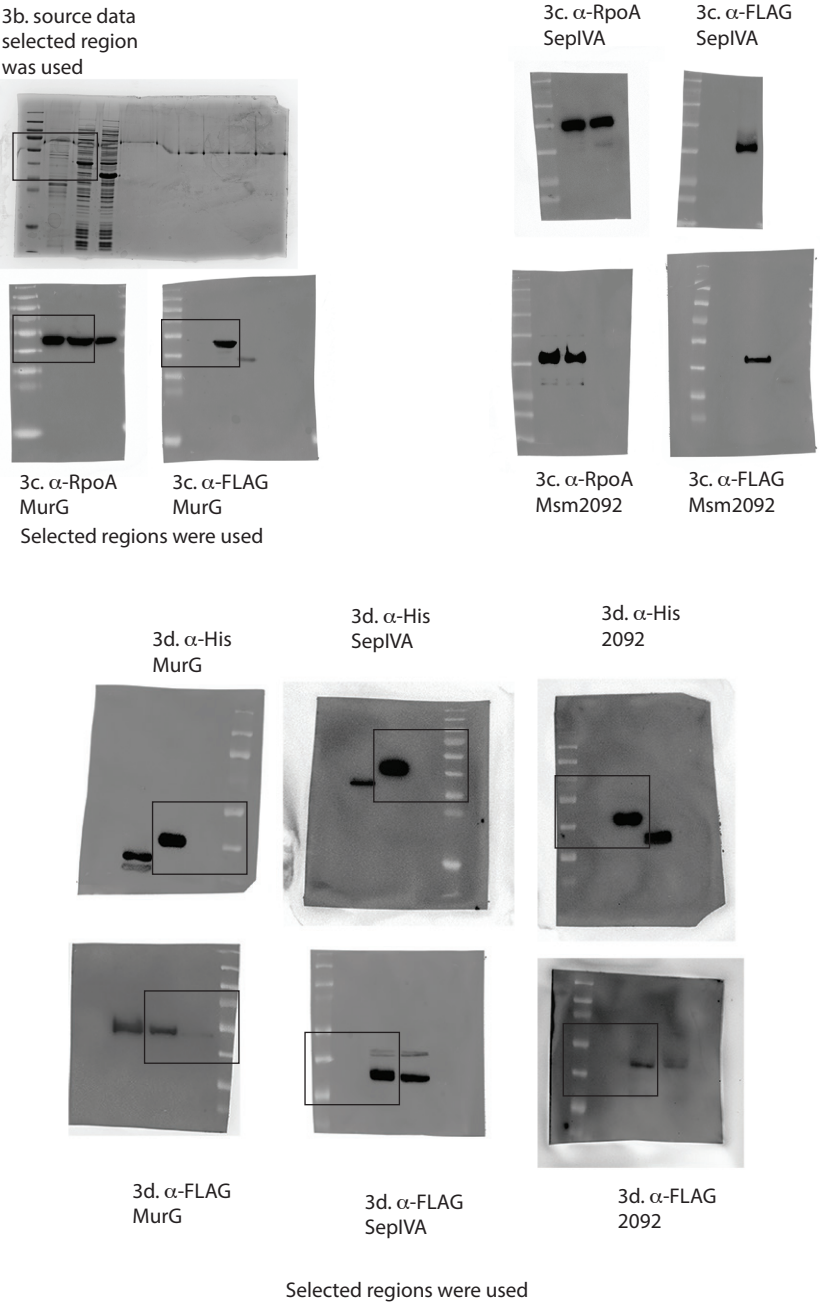

Supplement: fig3-data3 [file elife-104268-fig3-data3-v1.zip]

Figure 3-Figure Supplement 1- Source Data

Figure 3-Figure Supplement 1a- Source Data

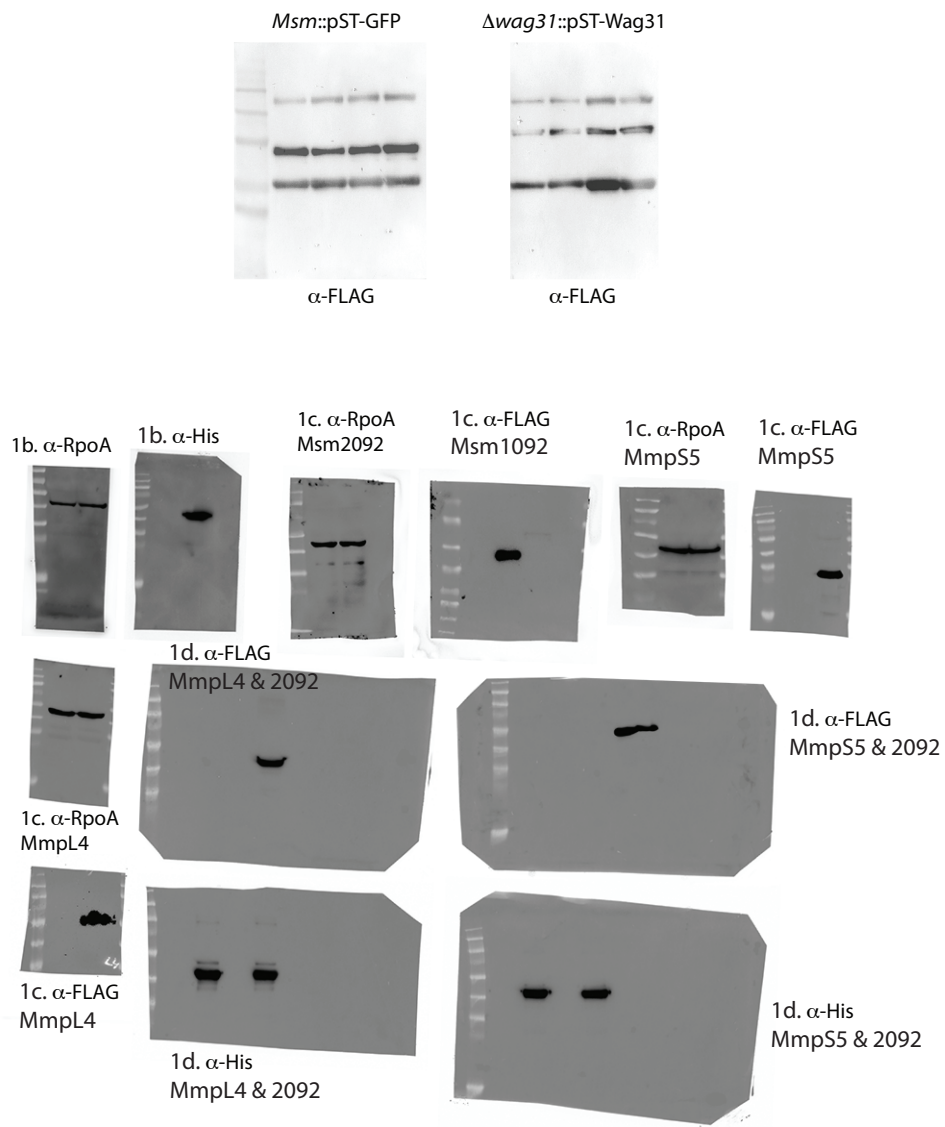

Supplement: fig3-figsupp1-data1 [file elife-104268-fig3-figsupp1-data1-v1.zip]

Figure 7-Source Data 1

Figure 7b. Selected region was used for the figure

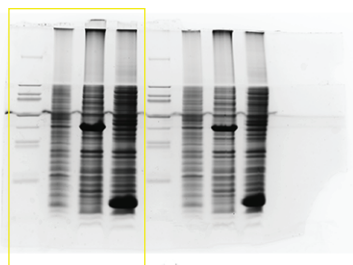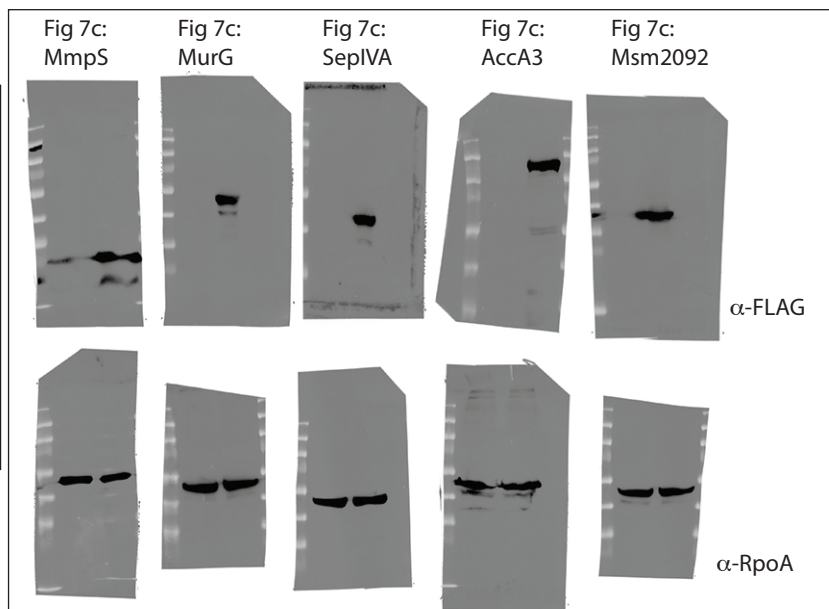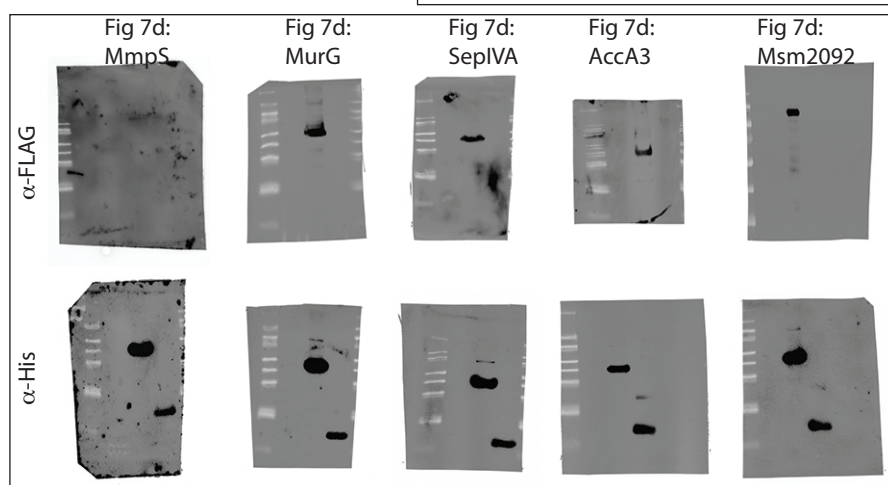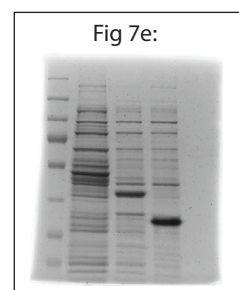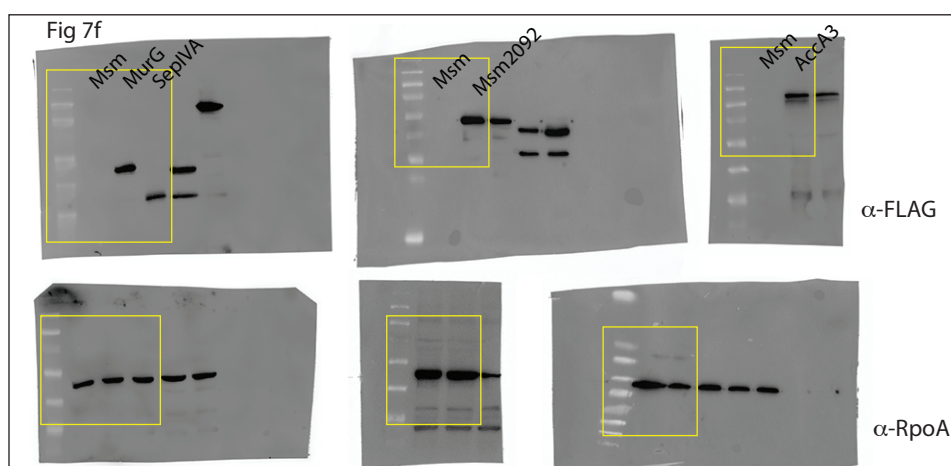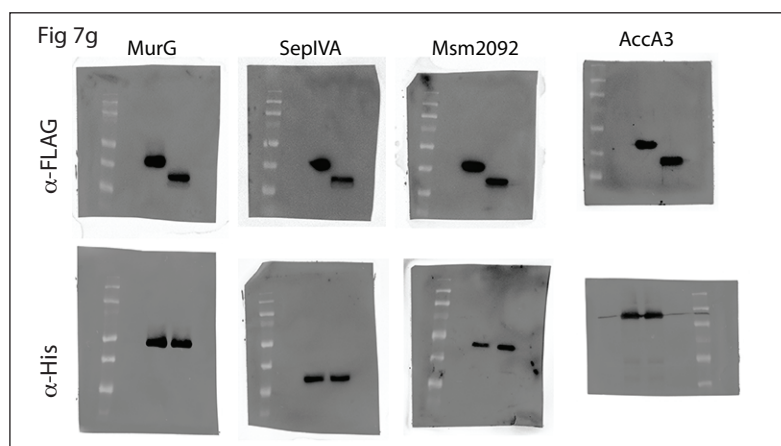

Supplement: fig7-data1 [file elife-104268-fig7-data1-v1.zip]
